# Supplementary material for: Synthesis of 3-CF3-4-acyl-substituted quinoline derivatives via a cascade reaction of nitrosoarenes and β-CF3-1,3-enynes
Source: Royal Society of Chemistry journal article supplement (doi:10.1039/d3qo01208e), 2023-01-01

# Supporting Information

## Synthesis of 3-CF<sub>3</sub>-4-acyl-substituted quinoline derivatives via a cascade reaction of nitrosoarenes and $\beta$ -CF<sub>3</sub>-1,3-enynes

Wenhui Li<sup>a</sup>, Shuangping Huang<sup>a</sup>, Qiang Liu<sup>a</sup>, Xing Li<sup>a,\*</sup> and Wenwen Chen<sup>b,\*</sup>

<sup>a</sup>Department of Biomedical Engineering, Taiyuan University of Technology, 79 West Yingze Street, Taiyuan 030024, People's Republic of China. E-mail: [lixing@tyut.edu.cn](mailto:lixing@tyut.edu.cn)

<sup>b</sup>School of Chemistry and Material Science, Shanxi Normal University, 339, Taiyu Road, Taiyuan 030000, People's Republic of China. Email: [chenww@sxnu.edu.cn](mailto:chenww@sxnu.edu.cn)

### Table of Contents

|                                                                                                           |     |
|-----------------------------------------------------------------------------------------------------------|-----|
| 1. General information.....                                                                               | S2  |
| 2. Optimization of reaction conditions.....                                                               | S2  |
| 3. General procedures.....                                                                                | S4  |
| 3.1 Operational procedure for the synthesis of compound <b>2n-3</b> .....                                 | S4  |
| 3.2 General procedure for the synthesis of products <b>3</b> .....                                        | S4  |
| 3.3 Operational procedure for 5.0 mmol-scale preparation of product <b>3aa</b> .....                      | S4  |
| 3.4 Operational procedure for the synthesis of compounds <b>4</b> and <b>5</b> .....                      | S5  |
| 4. Crystal data of products <b>3aa</b> , <b>3va</b> and <b>4</b> .....                                    | S5  |
| 5. Characterization data for substrate <b>2n</b> .....                                                    | S9  |
| 6. Characterization data for all products <b>3</b> .....                                                  | S10 |
| 7. Characterization data for compound <b>4</b> .....                                                      | S22 |
| 8. Characterization data for compound <b>5</b> .....                                                      | S23 |
| 9. References.....                                                                                        | S23 |
| 10. <sup>1</sup> H NMR, <sup>13</sup> C NMR and <sup>19</sup> F NMR spectra for substrate <b>2n</b> ..... | S25 |
| 11. <sup>1</sup> H NMR, <sup>13</sup> C NMR and <sup>19</sup> F NMR spectra for products <b>3</b> .....   | S26 |
| 12. <sup>1</sup> H NMR, <sup>13</sup> C NMR and <sup>19</sup> F NMR spectra for compound <b>4</b> .....   | S79 |
| 13. <sup>1</sup> H NMR, <sup>13</sup> C NMR and <sup>19</sup> F NMR spectra for compound <b>5</b> .....   | S80 |

## 1. General information

Unless otherwise indicated, all reagents were purchased from commercial sources and used without further purification. And deuterated solvents were purchased from Sigma–Aldrich. Substrates such as nitrosoarenes<sup>1</sup> and 2-CF<sub>3</sub>-1,3-enynes<sup>2</sup> were synthesized according to the corresponding literature procedures. Unless otherwise stated, all reactions were accomplished in the reaction tubes under air atmosphere. All reactions were monitored by thin layer chromatography (TLC). Column chromatography was carried out using 200–300 mesh silica gel. <sup>1</sup>H NMR spectra were recorded on a Bruker Avance III 400 or 600 MHz NMR spectrometer and chemical shifts (in ppm) were referred to CDCl<sub>3</sub> ( $\delta$  = 7.26 ppm), as an internal standard. <sup>1</sup>H NMR spectra were recorded as follows: chemical shift, multiplicity (s = singlet; d = doublet; q = quartet; m = multiplet; br = broad), coupling constant (Hz), and integral. Proton-decoupled <sup>13</sup>C NMR spectra were obtained by using the same NMR spectrometer, running at 150 or 100 MHz, respectively and were calibrated with CDCl<sub>3</sub> ( $\delta$  = 77.16 ppm). The <sup>19</sup>F NMR spectra were recorded at 564 or 376 MHz. High-resolution mass spectra were performed on a micrOTOF-Q II instrument with an ESI source. Melting points were measured with an RD-II melting point apparatus and are uncorrected.

## 2. Optimization of reaction conditions

Next, some other reaction conditions including catalyst loading, amount of base, solvent dosage and temperature were also examined, respectively (Table 2). 30 mol% Cu(OTf)<sub>2</sub> and 0.5 equiv of DMAP were suitable for this transformation. Increasing or decreasing their amounts led to the lower yields (Table 2, entry 1 vs 2–7 and entry 1 vs 8–11). The solvent dosage had little effect on the reaction yield (Table 2, entries 12–14). It was more appropriate to use 0.8 mL EA (Table 2, entry 13). Variation of reaction temperature could not further improve the yield (Table 2, entries 13 and 15–17). The investigation of material ratio showed that the better yield (83%) was obtained when the ratio of nitrosobenzene **1a** and [3-(trifluoromethyl)but-3-en-1-yn-1-yl]benzene **2a** was 2.3:1.0 (Table 2, entry 22 vs 13, 18–21 and 23–25). After systematic optimization of the reaction conditions, the optimal condition was

determined. In the presence of Cu(OTf)<sub>2</sub> (22.0 mg, 0.06 mmol, 30 mol%) and DMAP (12.5 mg, 0.10 mmol, 0.5 equiv), the reaction of nitrosobenzene **1a** (50.8 mg, 0.46 mmol, 2.3 equiv.) and (3-(trifluoromethyl)but-3-en-1-yn-1-yl)benzene **2a** (40.5 mg, 0.20 mmol, 1.0 equiv.) was conducted in ethyl acetate (EA, 0.8 mL) at 30 °C for 12 h, affording the desired product **3aa** in 83% yield (Table 2, entry 22).

**Table 2. Optimization of Other Reaction Conditions<sup>a</sup>**

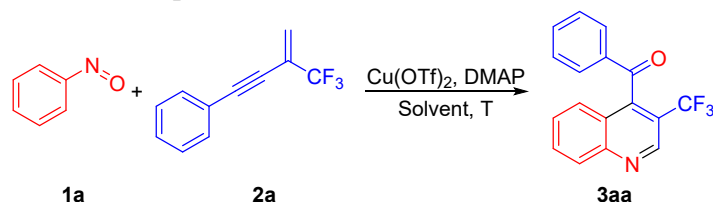

| entry     | catalyst (mol%)                 | base (equiv)      | solvent (mL)    | T/°C      | <b>1a:2a</b>   | yield <sup>b</sup> (%) |
|-----------|---------------------------------|-------------------|-----------------|-----------|----------------|------------------------|
| 1         | Cu(OTf) <sub>2</sub> (30)       | DMAP (0.5)        | DCE (1.0)       | 30        | 1.0:1.0        | 55                     |
| 2         | Cu(OTf) <sub>2</sub> (10)       | DMAP (0.5)        | DCE (1.0)       | 30        | 1.0:1.0        | 38                     |
| 3         | Cu(OTf) <sub>2</sub> (20)       | DMAP (0.5)        | DCE (1.0)       | 30        | 1.0:1.0        | 43                     |
| 4         | Cu(OTf) <sub>2</sub> (25)       | DMAP (0.5)        | DCE (1.0)       | 30        | 1.0:1.0        | 50                     |
| 5         | Cu(OTf) <sub>2</sub> (28)       | DMAP (0.5)        | DCE (1.0)       | 30        | 1.0:1.0        | 50                     |
| 6         | Cu(OTf) <sub>2</sub> (32)       | DMAP (0.5)        | DCE (1.0)       | 30        | 1.0:1.0        | 53                     |
| 7         | Cu(OTf) <sub>2</sub> (35)       | DMAP (0.5)        | DCE (1.0)       | 30        | 1.0:1.0        | 50                     |
| 8         | Cu(OTf) <sub>2</sub> (30)       | DMAP (0.4)        | DCE (1.0)       | 30        | 1.0:1.0        | 49                     |
| 9         | Cu(OTf) <sub>2</sub> (30)       | DMAP (0.45)       | DCE (1.0)       | 30        | 1.0:1.0        | 50                     |
| 10        | Cu(OTf) <sub>2</sub> (30)       | DMAP (0.6)        | DCE (1.0)       | 30        | 1.0:1.0        | 52                     |
| 11        | Cu(OTf) <sub>2</sub> (30)       | DMAP (0.7)        | DCE (1.0)       | 30        | 1.0:1.0        | 50                     |
| 12        | Cu(OTf) <sub>2</sub> (30)       | DMAP (0.5)        | EA (0.5)        | 30        | 1.0:1.0        | 67                     |
| 13        | Cu(OTf) <sub>2</sub> (30)       | DMAP (0.5)        | EA (0.8)        | 30        | 1.0:1.0        | 70                     |
| 14        | Cu(OTf) <sub>2</sub> (30)       | DMAP (0.5)        | EA (1.2)        | 30        | 1.0:1.0        | 63                     |
| 15        | Cu(OTf) <sub>2</sub> (30)       | DMAP (0.5)        | EA (0.8)        | 20        | 1.0:1.0        | 47                     |
| 16        | Cu(OTf) <sub>2</sub> (30)       | DMAP (0.5)        | EA (0.8)        | 40        | 1.0:1.0        | 70                     |
| 17        | Cu(OTf) <sub>2</sub> (30)       | DMAP (0.5)        | EA (0.8)        | 50        | 1.0:1.0        | 62                     |
| 18        | Cu(OTf) <sub>2</sub> (30)       | DMAP (0.5)        | EA (0.8)        | 30        | 1.3:1.0        | 78                     |
| 19        | Cu(OTf) <sub>2</sub> (30)       | DMAP (0.5)        | EA (0.8)        | 30        | 1.5:1.0        | 77                     |
| 20        | Cu(OTf) <sub>2</sub> (30)       | DMAP (0.5)        | EA (0.8)        | 30        | 1.7:1.0        | 75                     |
| 21        | Cu(OTf) <sub>2</sub> (30)       | DMAP (0.5)        | EA (0.8)        | 30        | 2.0:1.0        | 76                     |
| <b>22</b> | <b>Cu(OTf)<sub>2</sub> (30)</b> | <b>DMAP (0.5)</b> | <b>EA (0.8)</b> | <b>30</b> | <b>2.3:1.0</b> | <b>83</b>              |
| 23        | Cu(OTf) <sub>2</sub> (30)       | DMAP (0.5)        | EA (0.8)        | 30        | 1.0:1.3        | 77                     |
| 24        | Cu(OTf) <sub>2</sub> (30)       | DMAP (0.5)        | EA (0.8)        | 30        | 1.0:1.5        | 78                     |
| 25        | Cu(OTf) <sub>2</sub> (30)       | DMAP (0.5)        | EA (0.8)        | 30        | 1.0:2.0        | 75                     |

<sup>a</sup> Unless otherwise noted, all reactions were performed with nitrosobenzene **1a** (22.1 mg, 0.2 mmol, 1.0 equiv.), [3-(trifluoromethyl)-3-buten-1-ynyl]benzene **2a** (40.5 mg, 0.2 mmol, 1.0 equiv.), a catalyst (0.06 mmol, 30 mol%) and a base (0.1 mmol, 0.5 equiv.) in a solvent (1.0 mL) at 30 °C (water bath) under air atmosphere for 12 h. <sup>b</sup> Isolated yield after column chromatography.

### 3. General procedures

#### 3.1 Operational procedure for the synthesis of compound **2n-3**<sup>3,4</sup>

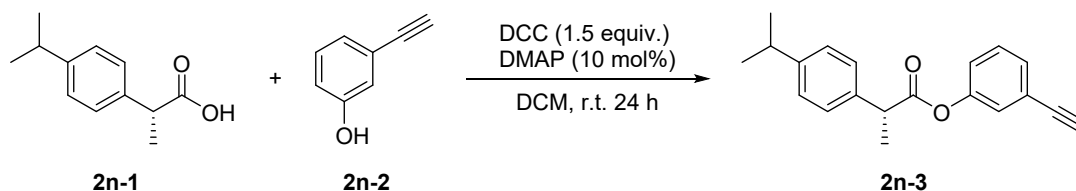

To a 100 mL of round-bottom flask equipped with a magnetic stir bar were added (*R*)-2-(4-isopropylphenyl)propanoic acid **2n-1** (2.5 g, 12.0 mmol, 1.2 equiv.), 3-ethynylphenol **2n-2** (1.1 mL, 10.0 mmol, 1.0 equiv.), dicyclohexylcarbodiimide (DCC, 3.1 g, 15.0 mmol, 1.5 equiv.), 4-dimethylaminopyridine (DMAP, 122.2 mg, 1.0 mmol, 10 mol%) and CH<sub>2</sub>Cl<sub>2</sub> (30 mL). The mixture was then stirred at room temperature for 24 h. Finally, after the reaction mixture was evaporated, the residue was purified by column chromatography (silica gel, hexane/EtOAc) to give the 3-ethynylphenyl (*R*)-2-(4-isopropylphenyl)propanoate **2n-3**.

Subsequently, substrate **2n** was synthesized using the compound **2n-3** as a starting material via the method in the reference 2.

#### 3.2 General procedure for the synthesis of products **3**

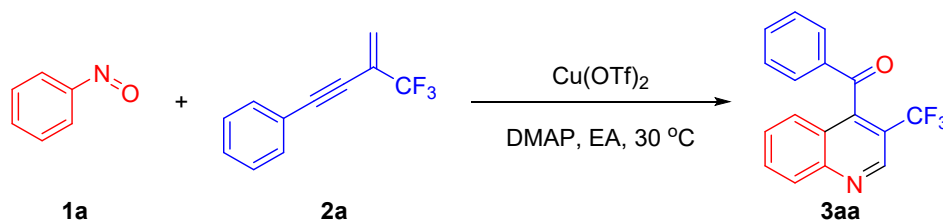

To a reaction system of nitrosobenzene **1a** (0.46 mmol, 2.3 equiv), Cu(OTf)<sub>2</sub> (0.06 mmol, 30 mol%) and DMAP (1.0 mmol, 0.5 equiv.) in ethyl acetate (EA) as a solvent (0.8 mL) was added (3-(trifluoromethyl)but-3-en-1-yn-1-yl)benzene **2a** (0.2 mmol). Then, the resultant solution was stirred under air atmosphere at 30 °C (water bath) for 12 h. Finally, the reaction mixture was purified by silica gel column chromatography (PE:EA = 15:1) to provide the corresponding product **3aa** (83% yield).

#### 3.3 Operational procedure for 5.0 mmol-scale preparation of product **3aa**

The reaction system of Cu(OTf)<sub>2</sub> (1.5 mmol, 30 mol%), DMAP (2.5 mmol, 0.5

equiv.), nitrosobenzene **1a** (11.5 mmol, 2.3 equiv.) and (3-(trifluoromethyl)but-3-en-1-yn-1-yl)benzene **2a** (5 mmol) in ethyl acetate as a solvent (20.0 mL) was stirred at 30 °C (water bath) for 15 h. At last, the reaction mixture was concentrated in vacuum and purified by silica gel column chromatography to give the desired product **3aa** (0.998 g, 67% isolated yield).

### 3.4 Operational procedure for the synthesis of compounds **4** and **5**

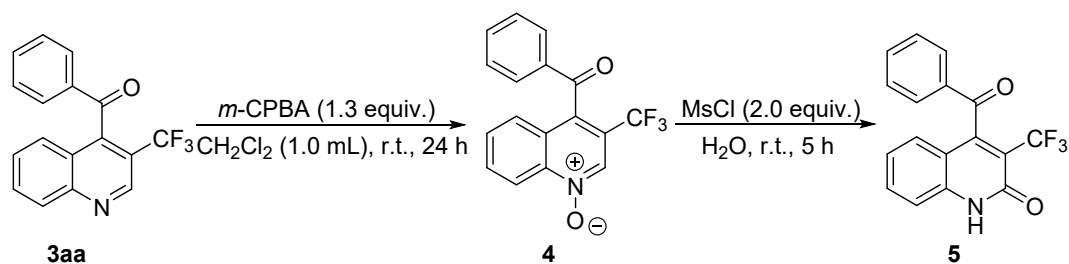

To a solution of the phenyl(3-(trifluoromethyl)quinolin-4-yl)methanone **3aa** (30.7 mg, 0.1 mmol) in CH<sub>2</sub>Cl<sub>2</sub> (1.0 mL) was added *m*-chloroperoxybenzoic acid (*m*-CPBA, 28.0 mg, 0.13 mmol, 1.3 equiv.) at 0 °C. The reaction mixture was then allowed to stir at room temperature (water bath) for 24 h. Next, the reaction mixture was washed with saturated aq. NaHCO<sub>3</sub> solution (2.0 mL) and extracted with CH<sub>2</sub>Cl<sub>2</sub> (5.0 mL X 3). The organic extracts were dried over anhydrous Na<sub>2</sub>SO<sub>4</sub>, filtered and concentrated under reduced pressure. The crude product was purified by column chromatography on silica gel to obtain the pure 4-benzoyl-3-(trifluoromethyl)quinoline 1-oxide **4** (94% yield). To a 10 mL round bottom flask equipped with a magnetic stir bar were consecutively added 4-benzoyl-3-(trifluoromethyl)quinoline 1-oxide **4** (96.1 mg, 0.3 mmol), H<sub>2</sub>O (3.0 mL) and MsCl (51.6 μL, 0.6 mmol). Subsequently, the reaction system was stirred at room temperature (water bath) for 5 h and the mixture was then extracted with CH<sub>2</sub>Cl<sub>2</sub> (10.0 mL X 3). The organic extracts were dried over anhydrous Na<sub>2</sub>SO<sub>4</sub>, filtered and concentrated under reduced pressure. The crude product was purified by column chromatography on silica gel to obtain the pure 4-benzoyl-3-(trifluoromethyl)quinolin-2(1H)-one **5** (94 % yield).

## 4. Crystal data of products **3aa**, **3va** and **4**

Crystallographic data for compounds **3aa** (2212193), **3va** (2255170) and **4** (2255167) have been deposited with the Cambridge Crystallographic Data Centre. Copies of the data can be obtained, free of charge, on application to CCDC (Email:

deposit@ccdc.cam.ac.uk).

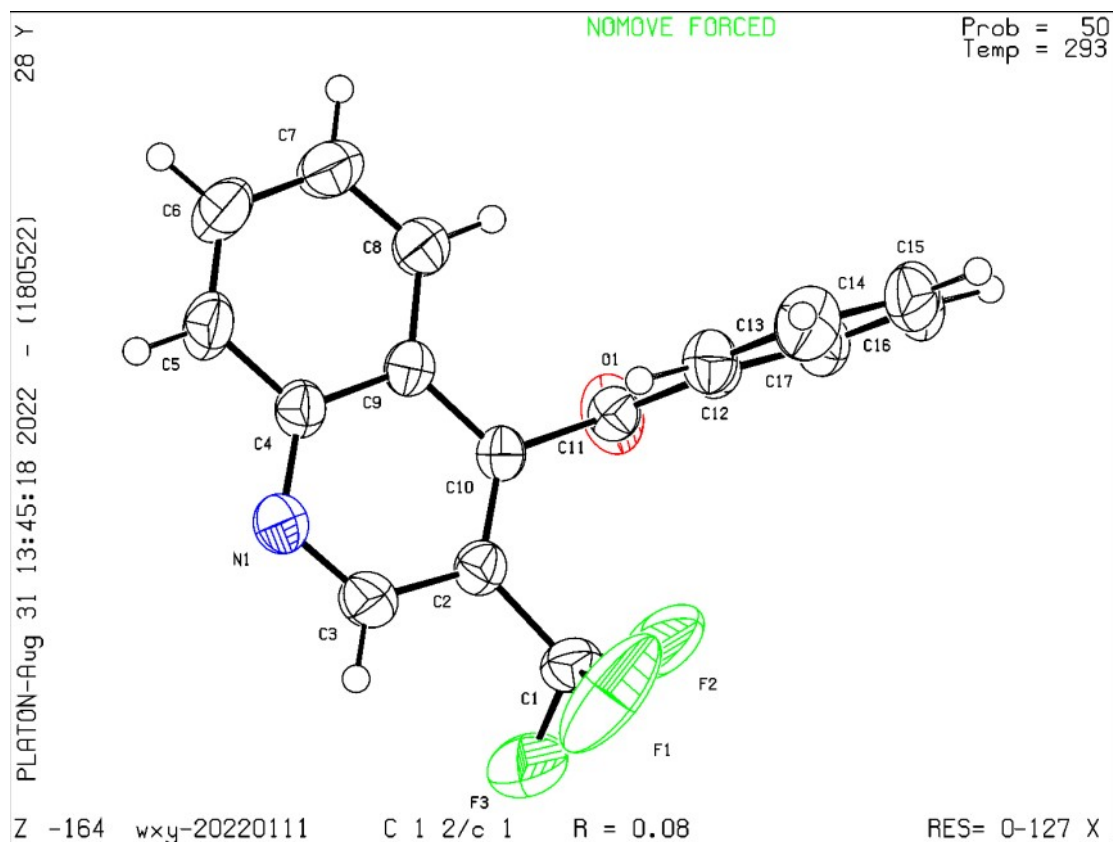

|                                    |                                                   |
|------------------------------------|---------------------------------------------------|
| CCDC number                        | 2212193                                           |
| Identification code                | <b>3aa</b>                                        |
| Empirical formula                  | C <sub>17</sub> H <sub>10</sub> F <sub>3</sub> NO |
| Formula weight                     | 301.26                                            |
| Temperature/K                      | 293(2)                                            |
| Crystal system                     | monoclinic                                        |
| Space group                        | C2/c                                              |
| a/Å                                | 23.0671(4)                                        |
| b/Å                                | 7.9648(2)                                         |
| c/Å                                | 15.0332(3)                                        |
| α/°                                | 90                                                |
| β/°                                | 94.736(2)                                         |
| γ/°                                | 90                                                |
| Volume/Å <sup>3</sup>              | 2752.54(10)                                       |
| Z                                  | 8                                                 |
| ρ <sub>calc</sub> /cm <sup>3</sup> | 1.454                                             |
| μ/mm <sup>-1</sup>                 | 1.019                                             |
| F(000)                             | 1232.0                                            |

|                                             |                                                               |
|---------------------------------------------|---------------------------------------------------------------|
| Crystal size/mm <sup>3</sup>                | 0.29 × 0.25 × 0.2                                             |
| Radiation                                   | Cu Kα (λ = 1.54184)                                           |
| 2θ range for data collection/°              | 7.692 to 143.066                                              |
| Index ranges                                | -24 ≤ h ≤ 28, -9 ≤ k ≤ 9, -18 ≤ l ≤ 15                        |
| Reflections collected                       | 5836                                                          |
| Independent reflections                     | 2617 [R <sub>int</sub> = 0.0192, R <sub>sigma</sub> = 0.0247] |
| Data/restraints/parameters                  | 2617/0/199                                                    |
| Goodness-of-fit on F <sup>2</sup>           | 1.128                                                         |
| Final R indexes [I ≥ 2σ (I)]                | R <sub>1</sub> = 0.0838, wR <sub>2</sub> = 0.2317             |
| Final R indexes [all data]                  | R <sub>1</sub> = 0.0962, wR <sub>2</sub> = 0.2380             |
| Largest diff. peak/hole / e Å <sup>-3</sup> | 0.80/-0.46                                                    |

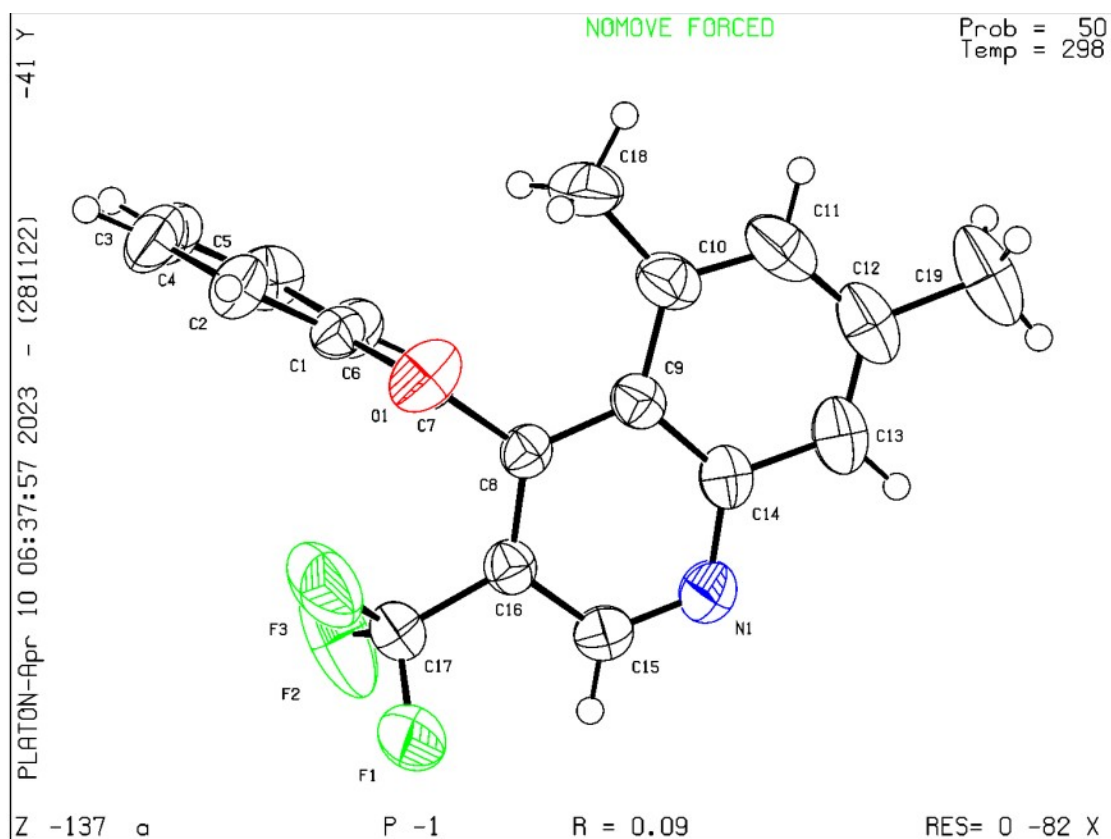

|                     |                                                   |
|---------------------|---------------------------------------------------|
| CCDC number         | 2255170                                           |
| Identification code | <b>3va</b>                                        |
| Empirical formula   | C <sub>19</sub> H <sub>14</sub> F <sub>3</sub> NO |
| Formula weight      | 329.31                                            |
| Temperature/K       | 298                                               |
| Space group         | P -1                                              |
| a/Å                 | 8.201(3)                                          |
| b/Å                 | 9.496(3)                                          |

|                                           |               |
|-------------------------------------------|---------------|
| c/Å                                       | 11.840(4)     |
| $\alpha/^\circ$                           | 100.468 (8)   |
| $\beta/^\circ$                            | 96.571 (7)    |
| $\gamma/^\circ$                           | 9115.027 (8)  |
| Volume/Å <sup>3</sup>                     | 802.4 (5)     |
| Z                                         | 2             |
| $\rho_{\text{calc}}/\text{g}/\text{cm}^3$ | 1.363         |
| $\mu/\text{mm}^{-1}$                      | 0.108         |
| F(000)                                    | 340.0         |
| Nref                                      | 4030          |
| Tmin, Tmax                                | 0.974, 0.984  |
| h, k, lmax                                | 10, 12, 15    |
| Data completeness                         | 0.967         |
| Theta(max)                                | 28.427        |
| R(reflections)                            | 0.0896 (2876) |
| wR2(reflections)                          | 0.2929 (3895) |
| S                                         | 1.079         |
| Npar                                      | 219           |

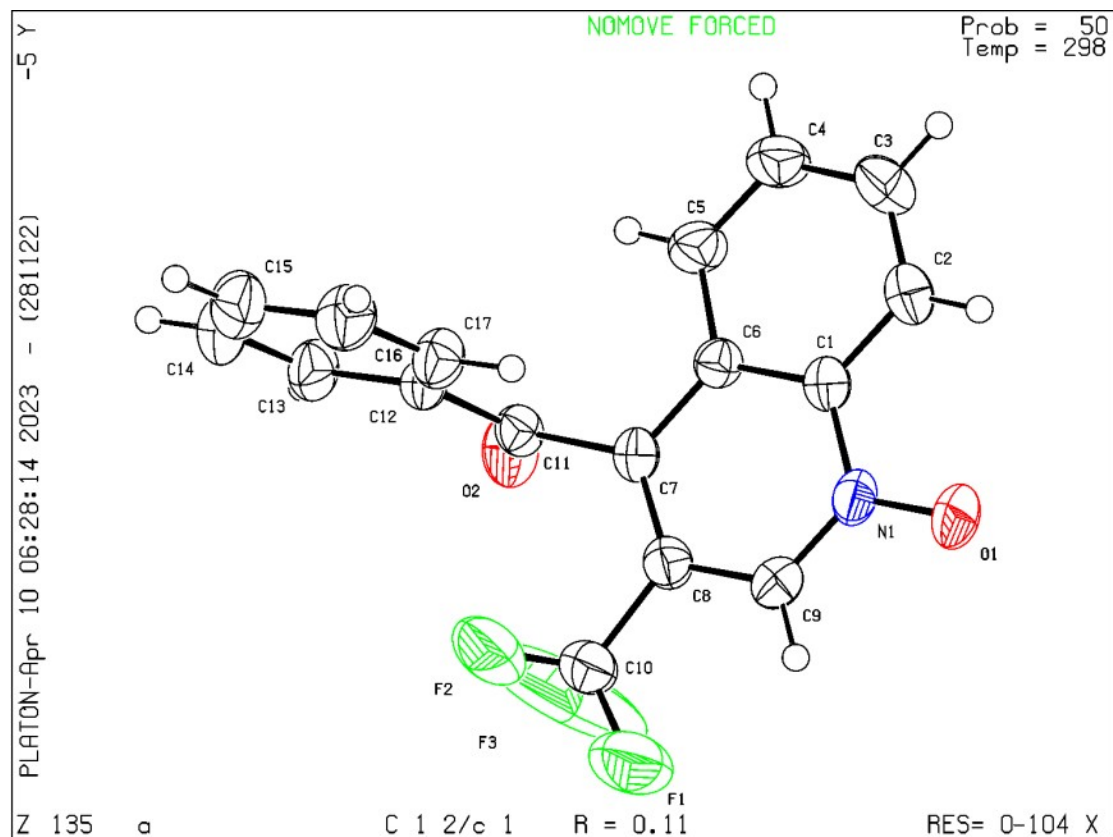

|                     |         |
|---------------------|---------|
| CCDC number         | 2255167 |
| Identification code | 4       |



|                                      |                                                                |
|--------------------------------------|----------------------------------------------------------------|
| Empirical formula                    | C <sub>17</sub> H <sub>10</sub> F <sub>3</sub> NO <sub>2</sub> |
| Formula weight                       | 317.26                                                         |
| Temperature/K                        | 298                                                            |
| Space group                          | C2/c                                                           |
| a/Å                                  | 25.164(3)                                                      |
| b/Å                                  | 8.0110(8)                                                      |
| c/Å                                  | 14.6926(14)                                                    |
| α/°                                  | 90                                                             |
| β/°                                  | 109.992 (2)                                                    |
| γ/°                                  | 90                                                             |
| Volume/Å <sup>3</sup>                | 2783.4(5)                                                      |
| Z                                    | 8                                                              |
| ρ <sub>calc</sub> /g/cm <sup>3</sup> | 1.514                                                          |
| μ/mm <sup>-1</sup>                   | 0.127                                                          |
| F(000)                               | 1296.0                                                         |
| N <sub>ref</sub>                     | 3490                                                           |
| T <sub>min</sub> , T <sub>max</sub>  | 0.966, 0.972                                                   |
| h, k, l <sub>max</sub>               | 33, 10, 19                                                     |
| Data completeness                    | 0.993                                                          |
| Theta(max)                           | 28.363                                                         |
| R(reflections)                       | 0.1088( 2791)                                                  |
| wR2(reflections)                     | 0.4121( 3464)                                                  |
| S                                    | 1.872                                                          |
| N <sub>par</sub>                     | 208                                                            |

## 5. Characterization data for substrate 2n

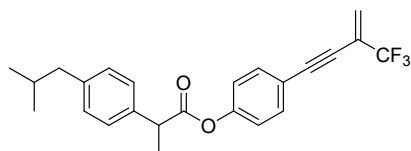

White oil, Silica gel TLC  $R_f = 0.50$  (PE); <sup>1</sup>H NMR (600 MHz, CDCl<sub>3</sub>) δ 7.35–7.30 (m, 4H), 7.17–7.16 (m, 3H), 7.04–7.03 (m, 1H), 6.13 (s, 1H), 5.95 (s, 1H), 3.95 (q,  $J = 1.8$  Hz, 1H), 2.49 (d,  $J = 4.2$  Hz, 2H), 1.91–1.86 (m, 1H), 1.63–1.62 (m, 3H), 0.94–0.92 (m, 6H) ppm; <sup>13</sup>C{<sup>1</sup>H} NMR (150 MHz, CDCl<sub>3</sub>) δ 173.1, 150.8, 141.1, 137.1, 129.7, 129.5, 129.4, 127.3, 124.9, 123.0, 122.9, 122.7 (q,  $J = 35.3$  Hz), 121.4 (q,  $J = 272.0$  Hz), 92.3, 82.2, 45.4, 45.3, 45.2, 30.3, 22.5, 18.6 ppm; <sup>19</sup>F NMR (564 MHz, CDCl<sub>3</sub>) δ -67.9 (s, 3F) ppm; HRMS (ESI)  $m/z$ : [M + Na]<sup>+</sup> calcd for C<sub>24</sub>H<sub>23</sub>F<sub>3</sub>NaO<sub>2</sub><sup>+</sup>, 423.1542; found, 423.1548.

## 6. Characterization data for all products 3

### Phenyl(3-(trifluoromethyl)quinolin-4-yl)methanone (**3aa**)

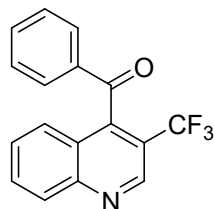

Yellow solid, 50.0 mg, 83% yield. Mp: 118–120 °C. Silica gel TLC  $R_f$  = 0.20 (PE:EA = 15:1);  $^1\text{H NMR}$  (600 MHz,  $\text{CDCl}_3$ )  $\delta$  9.21 (s, 1H), 8.26–8.25 (m, 1H), 7.88–7.85 (m, 1H), 7.78–7.77 (m, 2H), 7.66–7.61 (m, 2H), 7.58–7.55 (m, 1H), 7.49–7.46 (m, 2H) ppm;  $^{13}\text{C}\{^1\text{H}\}$  NMR (150 MHz,  $\text{CDCl}_3$ )  $\delta$  194.2, 149.4, 146.5 (q,  $J$  = 4.2 Hz), 144.9 (q,  $J$  = 2.4 Hz), 136.2, 134.9, 132.3, 130.3, 129.8, 129.2, 128.9, 126.3, 124.0, 123.5 (q,  $J$  = 273.0 Hz), 119.7 (q,  $J$  = 32.3 Hz) ppm;  $^{19}\text{F NMR}$  (564 MHz,  $\text{CDCl}_3$ )  $\delta$  -57.1 (s, 3F) ppm; HRMS (ESI)  $m/z$ :  $[\text{M} + \text{H}]^+$  calcd for  $\text{C}_{17}\text{H}_{11}\text{F}_3\text{NO}^+$ , 302.0787; found, 302.0794.

### (8-Methyl-3-(trifluoromethyl)quinolin-4-yl)(phenyl)methanone (**3ba**)

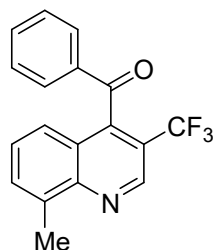

Yellow oil, 35.3 mg, 56% yield. Silica gel TLC  $R_f$  = 0.20 (pure PE);  $^1\text{H NMR}$  (600 MHz,  $\text{CDCl}_3$ )  $\delta$  9.23–9.21 (m, 1H), 7.77–7.76 (m, 2H), 7.71–7.70 (m, 1H), 7.66–7.61 (m, 1H), 7.49–7.44 (m, 4H), 2.89–2.86 (m, 3H) ppm;  $^{13}\text{C}\{^1\text{H}\}$  NMR (150 MHz,  $\text{CDCl}_3$ )  $\delta$  194.5, 148.5, 145.2 (q,  $J$  = 4.1 Hz), 145.0 (q,  $J$  = 2.3 Hz), 136.4, 134.8, 132.3, 129.8, 129.1, 128.6, 124.2, 124.0, 123.6 (q,  $J$  = 272.9 Hz), 119.5 (q,  $J$  = 31.8 Hz) ppm;  $^{19}\text{F NMR}$  (564 MHz,  $\text{CDCl}_3$ )  $\delta$  -57.1 (s, 3F) ppm; HRMS (ESI)  $m/z$ :  $[\text{M} + \text{H}]^+$  calcd for  $\text{C}_{18}\text{H}_{13}\text{F}_3\text{NO}^+$ , 316.0944; found, 316.0943.

### (5-Methyl-3-(trifluoromethyl)quinolin-4-yl)(phenyl)methanone (**3ca**)

### (7-Methyl-3-(trifluoromethyl)quinolin-4-yl)(phenyl)methanone (**3c'a**)

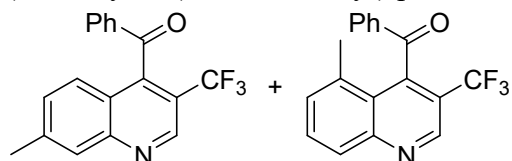

Yellow solid, 49.2 mg, 78% yield. Mp: 137–140 °C. Silica gel TLC  $R_f$  = 0.20 (PE:EA = 20:1);  $^1\text{H NMR}$  (400 MHz,  $\text{CDCl}_3$ )  $\delta$  9.17 (s, 0.14H), 9.15 (s, 1H), 8.15–8.13 (m,

0.07H), 8.02 (s, 1H), 7.77–7.72 (m, 2.28H), 7.65–7.60 (m, 1.16H), 7.50–7.44 (m, 3.46H), 7.41 (s, 0.15H), 7.39–7.37 (m, 1H), 2.58 (s, 3H), 2.38 (s, 0.45H) ppm;  $^{13}\text{C}\{^1\text{H}\}$  NMR (100 MHz,  $\text{CDCl}_3$ )  $\delta$  196.1, 194.3, 150.8, 149.7, 146.4 (q,  $J = 4.2$  Hz), 145.9 (q,  $J = 4.8$  Hz), 144.5, 143.2, 136.2, 136.0, 134.8, 134.5, 131.9, 131.1, 129.8, 129.4, 129.2, 129.1, 125.8, 123.6 (q,  $J = 272.7$  Hz), 123.5, 122.0, 118.9 (q,  $J = 31.9$  Hz), 23.9, 22.1 ppm;  $^{19}\text{F}$  NMR (376 MHz,  $\text{CDCl}_3$ )  $\delta$  -55.2 (s, 3F), -57.0 (s, 3F) ppm; HRMS (ESI)  $m/z$ :  $[\text{M} + \text{H}]^+$  calcd for  $\text{C}_{18}\text{H}_{13}\text{F}_3\text{NO}^+$ , 316.0944; found, 316.0946.

(6-Methyl-3-(trifluoromethyl)quinolin-4-yl)(phenyl)methanone (**3da**)

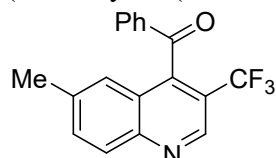

Yellow solid, 47.9 mg, 76% yield. Mp: 100–102 °C. Silica gel TLC  $R_f = 0.20$  (PE:EA = 15:1);  $^1\text{H}$  NMR (400 MHz,  $\text{CDCl}_3$ )  $\delta$  9.13 (s, 1H), 8.14–8.12 (m, 1H), 7.78–7.77 (m, 1H), 7.70–7.62 (m, 2H), 7.50–7.45 (m, 2H), 7.35 (s, 1H), 2.42 (s, 3H) ppm;  $^{13}\text{C}\{^1\text{H}\}$  NMR (100 MHz,  $\text{CDCl}_3$ )  $\delta$  194.5, 148.1, 145.4 (q,  $J = 5.0$  Hz), 144.0 (q,  $J = 3.5$  Hz), 139.3, 136.2, 134.9, 134.6, 129.9, 129.8, 129.1, 124.9, 124.8, 123.1 (q,  $J = 277.2$  Hz), 119.6 (q,  $J = 30.3$  Hz), 21.9 ppm;  $^{19}\text{F}$  NMR (376 MHz,  $\text{CDCl}_3$ )  $\delta$  -57.0 (s, 3F) ppm; HRMS (ESI)  $m/z$ :  $[\text{M} + \text{H}]^+$  calcd for  $\text{C}_{18}\text{H}_{13}\text{F}_3\text{NO}^+$ , 316.0944; found, 316.0945.

(6-Methoxy-3-(trifluoromethyl)quinolin-4-yl)(phenyl)methanone (**3ea**)

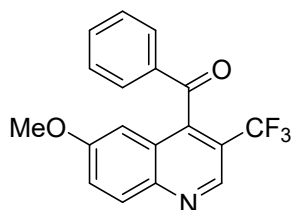

Yellow solid, 19.9 mg, 30% yield. Mp: 111–113 °C. Silica gel TLC  $R_f = 0.20$  (PE:EA = 30:1);  $^1\text{H}$  NMR (600 MHz,  $\text{CDCl}_3$ )  $\delta$  9.05 (s, 1H), 8.14–8.13 (m, 1H), 7.78–7.77 (m, 2H), 7.66–7.63 (m, 1H), 7.51–7.46 (m, 3H), 3.70 (s, 3H) ppm;  $^{13}\text{C}\{^1\text{H}\}$  NMR (150 MHz,  $\text{CDCl}_3$ )  $\delta$  194.6, 159.3, 145.8, 143.8 (q,  $J = 4.4$  Hz), 143.1 (q,  $J = 2.4$  Hz), 136.2, 134.9, 131.6, 129.8, 129.2, 125.2, 123.6 (q,  $J = 273.0$  Hz), 120.1 (q,  $J = 31.8$  Hz), 103.5, 55.7 ppm;  $^{19}\text{F}$  NMR (564 MHz,  $\text{CDCl}_3$ )  $\delta$  -57.0 (s, 3F) ppm; HRMS (ESI)  $m/z$ :  $[\text{M} + \text{H}]^+$  calcd for  $\text{C}_{18}\text{H}_{13}\text{F}_3\text{NO}_2^+$ , 332.0893; found, 332.0890.

(7-(*tert*-Butyl)-3-(trifluoromethyl)quinolin-4-yl)(phenyl)methanone (**3ga**)

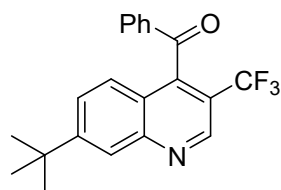

Yellow solid, 46.5 mg, 65% yield. Mp: 115–116 °C. Silica gel TLC  $R_f = 0.20$  (PE:EA

= 30:1); **<sup>1</sup>H NMR** (600 MHz, CDCl<sub>3</sub>) δ 9.17–9.16 (m, 1H), 8.20–8.19 (m, 1H), 7.79–7.76 (m, 2H), 7.65–7.61 (m, 2H), 7.55–7.52 (m, 1H), 7.48–7.45 (m, 2H), 1.42–1.41 (m, 9H) ppm; **<sup>13</sup>C{<sup>1</sup>H} NMR** (150 MHz, CDCl<sub>3</sub>) δ 194.3, 156.1, 149.7, 146.3 (q, *J* = 4.1 Hz), 144.4 (q, *J* = 2.4 Hz), 136.3, 134.8, 129.8, 129.1, 127.9, 125.7, 125.5, 123.6 (q, *J* = 272.9 Hz), 121.9, 119.1 (q, *J* = 30.9 Hz), 35.5, 31.0 ppm; **<sup>19</sup>F NMR** (564 MHz, CDCl<sub>3</sub>) δ -57.0 (s, 3F) ppm; **HRMS** (ESI) *m/z*: [M + H]<sup>+</sup> calcd for C<sub>21</sub>H<sub>19</sub>F<sub>3</sub>NO<sup>+</sup>, 358.1413; found, 358.1418.

(8-Fluoro-3-(trifluoromethyl)quinolin-4-yl)(phenyl)methanone (**3ha**)

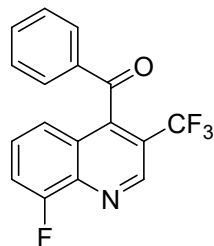

Yellow solid, 33.2 mg, 52% yield. Mp: 120–122 °C. Silica gel TLC *R<sub>f</sub>* = 0.20 (PE:EA = 30:1); **<sup>1</sup>H NMR** (600 MHz, CDCl<sub>3</sub>) δ 9.25 (s, 1H), 7.76–7.75 (m, 2H), 7.66–7.64 (m, 1H), 7.58–7.51 (m, 2H), 7.48 (t, *J* = 6.0 Hz, 2H), 7.41–7.40 (m, 1H) ppm; **<sup>13</sup>C{<sup>1</sup>H} NMR** (150 MHz, CDCl<sub>3</sub>) δ 193.4, 158.1 (d, *J* = 258.5 Hz), 146.7 (q, *J* = 2.4 Hz), 144.8 (q, *J* = 2.4 Hz), 139.8 (d, *J* = 11.9 Hz), 136.0 (d, *J* = 0.9 Hz), 135.1, 129.8, 129.3, 129.2, 129.0, 128.9, 125.6 (d, *J* = 1.5 Hz), 123.2 (q, *J* = 273.3 Hz), 122.0 (d, *J* = 5.0 Hz), 120.8 (q, *J* = 32.3 Hz) ppm; **<sup>19</sup>F NMR** (564 MHz, CDCl<sub>3</sub>) δ -57.3 (s, 3F), -122.7 (s, 1F) ppm; **HRMS** (ESI) *m/z*: [M + H]<sup>+</sup> calcd for C<sub>17</sub>H<sub>10</sub>F<sub>4</sub>NO<sup>+</sup>, 320.0693; found, 320.0707.

(7-Fluoro-3-(trifluoromethyl)quinolin-4-yl)(phenyl)methanone (**3ia**)

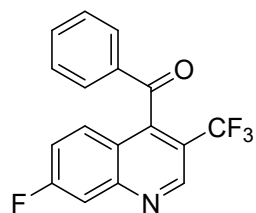

Yellow oil, 47.9 mg, 75% yield. Silica gel TLC *R<sub>f</sub>* = 0.20 (PE:EA = 30:1); **<sup>1</sup>H NMR** (400 MHz, CDCl<sub>3</sub>) δ 9.20 (s, 1H), 7.89–7.87 (m, 1H), 7.76–7.75 (m, 2H), 7.67–7.62 (m, 2H), 7.50–7.47 (m, 2H), 7.37–7.34 (m, 1H) ppm; **<sup>13</sup>C{<sup>1</sup>H} NMR** (100 MHz, CDCl<sub>3</sub>) δ 193.7, 164.5 (d, *J* = 254.3 Hz), 150.9 (d, *J* = 13.2 Hz), 147.6 (q, *J* = 4.1 Hz), 136.0, 135.1, 129.8, 129.3, 128.6 (d, *J* = 10.1 Hz), 123.4 (q, *J* = 272.9 Hz), 121.0, 119.7, 119.5, 119.3 (q, *J* = 29.3 Hz), 114.2, 114.1 ppm; **<sup>19</sup>F NMR** (376 MHz, CDCl<sub>3</sub>) δ -57.1 (s, 3F), -104.2 (s, 1F) ppm; **HRMS** (ESI) *m/z*: [M + H]<sup>+</sup> calcd for C<sub>17</sub>H<sub>10</sub>F<sub>4</sub>NO<sup>+</sup>, 320.0693; found, 320.0700.

(6-Fluoro-3-(trifluoromethyl)quinolin-4-yl)(phenyl)methanone (**3ja**)

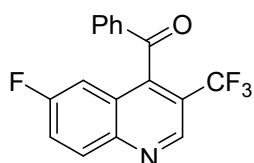

Yellow oil, 49.8 mg, 78% yield. Silica gel TLC  $R_f$  = 0.20 (PE:EA = 15:1);  $^1\text{H NMR}$  (600 MHz,  $\text{CDCl}_3$ )  $\delta$  9.17 (s, 1H), 8.28–8.25 (m, 1H), 7.77–7.75 (m, 2H), 7.68–7.61 (m, 2H), 7.51–7.47 (m, 2H), 7.23–7.20 (m, 1H) ppm;  $^{13}\text{C}\{^1\text{H}\}$  NMR (150 MHz,  $\text{CDCl}_3$ )  $\delta$  193.6, 161.5 (d,  $J$  = 376.8 Hz), 146.6, 145.8 (dt,  $J$  = 10.5 Hz,  $J$  = 4.7 Hz), 144.3 (dt,  $J$  = 5.3 Hz,  $J$  = 3.8 Hz), 135.8, 135.2, 132.9 (d,  $J$  = 14.0 Hz), 129.8, 129.3, 124.8 (d,  $J$  = 15.2 Hz), 123.3 (q,  $J$  = 273.1 Hz), 122.9, 122.7, 120.5 (q,  $J$  = 48.2 Hz), 109.8 (d,  $J$  = 35.1 Hz) ppm;  $^{19}\text{F NMR}$  (564 MHz,  $\text{CDCl}_3$ )  $\delta$  -57.2 (s, 3F), -108.6 (s, 1F) ppm; HRMS (ESI)  $m/z$ :  $[\text{M} + \text{H}]^+$  calcd for  $\text{C}_{17}\text{H}_{10}\text{F}_4\text{NO}^+$ , 320.0693; found, 320.0690.

(8-Chloro-3-(trifluoromethyl)quinolin-4-yl)(phenyl)methanone (**3ka**)

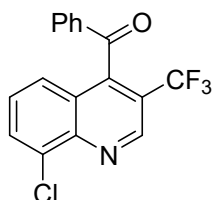

Yellow oil, 30.2 mg, 45% yield. Silica gel TLC  $R_f$  = 0.20 (PE:EA = 70:1);  $^1\text{H NMR}$  (400 MHz,  $\text{CDCl}_3$ )  $\delta$  9.32 (s, 1H), 8.00–7.98 (m, 1H), 7.76–7.74 (m, 2H), 7.68–7.64 (m, 1H), 7.58–7.54 (m, 1H), 7.51–7.46 (m, 3H) ppm;  $^{13}\text{C}\{^1\text{H}\}$  NMR (100 MHz,  $\text{CDCl}_3$ )  $\delta$  193.5, 147.0 (q,  $J$  = 4.1 Hz), 145.7, 145.5 (q,  $J$  = 2.3 Hz), 136.0, 135.2, 134.7, 132.4, 129.8, 129.3, 128.8, 128.7, 125.5, 125.3, 123.2 (q,  $J$  = 273.2 Hz), 120.7 (q,  $J$  = 32.2 Hz) ppm;  $^{19}\text{F NMR}$  (376 MHz,  $\text{CDCl}_3$ )  $\delta$  -57.3 (s, 3F) ppm; HRMS (ESI)  $m/z$ :  $[\text{M} + \text{H}]^+$  calcd for  $\text{C}_{17}\text{H}_{10}\text{ClF}_3\text{NO}^+$ , 336.0398; found, 336.0405.

(7-Chloro-3-(trifluoromethyl)quinolin-4-yl)(phenyl)methanone (**3la**)

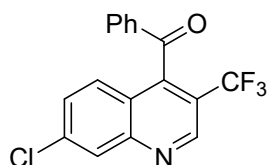

Yellow oil, 36.3 mg, 54% yield. Silica gel TLC  $R_f$  = 0.20 (PE:EA = 50:1);  $^1\text{H NMR}$  (400 MHz,  $\text{CDCl}_3$ )  $\delta$  9.20 (s, 1H), 8.25 (d,  $J$  = 2.0 Hz, 1H), 7.76–7.74 (m, 2H), 7.68–7.64 (m, 1H), 7.56–7.46 (m, 4H) ppm;  $^{13}\text{C}\{^1\text{H}\}$  NMR (100 MHz,  $\text{CDCl}_3$ )  $\delta$  193.5, 149.8, 147.0 (q,  $J$  = 4.0 Hz), 144.9 (q,  $J$  = 2.3 Hz), 138.6, 136.0, 135.2, 130.0, 129.8, 129.3, 128.6, 127.5, 123.3 (q,  $J$  = 273.0 Hz), 122.4, 119.9 (q,  $J$  = 32.2 Hz) ppm;  $^{19}\text{F NMR}$  (376 MHz,  $\text{CDCl}_3$ )  $\delta$  -57.2 (s, 3F) ppm; HRMS (ESI)  $m/z$ :  $[\text{M} + \text{H}]^+$  calcd for  $\text{C}_{17}\text{H}_{10}\text{ClF}_3\text{NO}^+$ , 336.0398; found, 336.0408.

(6-Chloro-3-(trifluoromethyl)quinolin-4-yl)(phenyl)methanone (**3ma**)

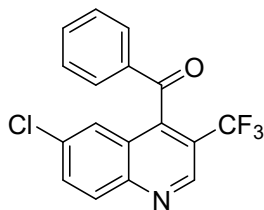

Yellow solid, 50.4 mg, 75% yield. Mp: 115–117 °C. Silica gel TLC  $R_f$  = 0.20 (PE:EA = 30:1);  $^1\text{H NMR}$  (600 MHz,  $\text{CDCl}_3$ )  $\delta$  9.17 (s, 1H), 8.18–8.16 (m, 1H), 7.77–7.75 (m, 3H), 7.65–7.62 (m, 1H), 7.58–7.57 (m, 1H), 7.48–7.46 (m, 2H) ppm;  $^{13}\text{C}\{^1\text{H}\}$  NMR (150 MHz,  $\text{CDCl}_3$ )  $\delta$  193.4, 147.8, 146.6 (q,  $J$  = 2.7 Hz), 144.0 (q,  $J$  = 2.6 Hz), 135.9, 135.2, 135.1, 133.3, 131.8, 129.8, 129.3, 124.9, 124.6, 123.2 (q,  $J$  = 273.3 Hz), 120.5 (q,  $J$  = 31.2 Hz) ppm;  $^{19}\text{F NMR}$  (564 MHz,  $\text{CDCl}_3$ )  $\delta$  -57.2 (s, 3F) ppm; HRMS (ESI)  $m/z$ :  $[\text{M} + \text{H}]^+$  calcd for  $\text{C}_{17}\text{H}_{10}\text{ClF}_3\text{NO}^+$ , 336.0398; found, 336.0404.

(6-Nitro-3-(trifluoromethyl)quinolin-4-yl)(phenyl)methanone (**3pa**)

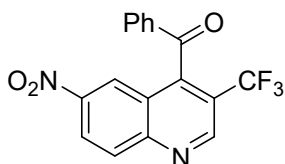

Yellow oil, 35.3 mg, 51% yield. Silica gel TLC  $R_f$  = 0.20 (PE:EA = 20:1);  $^1\text{H NMR}$  (400 MHz,  $\text{CDCl}_3$ )  $\delta$  9.36 (s, 1H), 8.64–8.61 (m, 1H), 8.54 (d,  $J$  = 2.4 Hz, 1H), 8.44–8.42 (m, 1H), 7.78–7.76 (m, 2H), 7.72–7.68 (m, 1H), 7.54–7.50 (m, 2H) ppm;  $^{13}\text{C}\{^1\text{H}\}$  NMR (100 MHz,  $\text{CDCl}_3$ )  $\delta$  192.5, 151.1, 149.9 (q,  $J$  = 3.9 Hz), 146.9 (q,  $J$  = 2.9 Hz), 135.7, 132.4, 130.0, 129.5, 128.9, 124.3 (q,  $J$  = 272.9 Hz), 123.3, 121.5 (q,  $J$  = 32.5 Hz) ppm;  $^{19}\text{F NMR}$  (376 MHz,  $\text{CDCl}_3$ )  $\delta$  -57.4 (s, 3F) ppm; HRMS (ESI)  $m/z$ :  $[\text{M} + \text{H}]^+$  calcd for  $\text{C}_{17}\text{H}_{10}\text{F}_3\text{N}_2\text{O}_3^+$ , 347.0638; found, 347.0635.

4-Benzoyl-3-(trifluoromethyl)quinoline-6-carbonitrile (**3qa**)

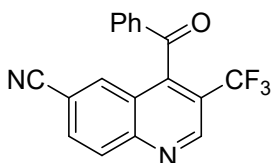

Yellow solid, 52.9 mg, 81% yield. Mp: 168–170 °C. Silica gel TLC  $R_f$  = 0.20 (PE:EA = 10:1);  $^1\text{H NMR}$  (600 MHz,  $\text{CDCl}_3$ )  $\delta$  9.32 (s, 1H), 8.37–8.36 (m, 1H), 8.01–7.99 (m, 2H), 7.80–7.75 (m, 2H), 7.72–7.69 (m, 1H), 7.54–7.51 (m, 2H) ppm;  $^{13}\text{C}\{^1\text{H}\}$  NMR (150 MHz,  $\text{CDCl}_3$ )  $\delta$  192.7, 150.1, 149.3 (q,  $J$  = 2.9 Hz), 145.4 (q,  $J$  = 2.6 Hz), 135.6, 133.2, 133.0, 132.8, 132.4, 131.9, 129.9, 129.5, 126.2, 123.6, 122.9 (q,  $J$  = 273.6 Hz), 121.4 (q,  $J$  = 35.7 Hz), 117.6, 112.9 ppm;  $^{19}\text{F NMR}$  (564 MHz,  $\text{CDCl}_3$ )  $\delta$  -57.4 (s, 3F) ppm; HRMS (ESI)  $m/z$ :  $[\text{M} + \text{H}]^+$  calcd for  $\text{C}_{18}\text{H}_{10}\text{F}_3\text{N}_2\text{O}^+$ , 327.0740; found, 327.0737.

(6,7-Dimethyl-3-(trifluoromethyl)quinolin-4-yl)(phenyl)methanone (**3ra**)

(5,6-Dimethyl-3-(trifluoromethyl)quinolin-4-yl)(phenyl)methanone (**3r'a**)

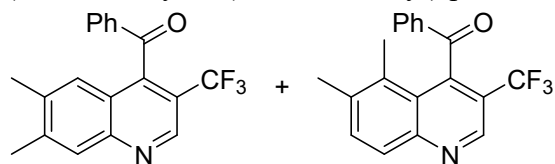

Yellow solid, 50.1 mg, 76% yield. Mp: 98–100 °C. Silica gel TLC  $R_f$  = 0.20 (PE:EA = 15:1);  $^1\text{H NMR}$  (600 MHz,  $\text{CDCl}_3$ )  $\delta$  9.11–9.09 (m, 1.15H), 8.03 (d,  $J$  = 9.0 Hz, 0.15H), 7.99 (s, 1H), 7.77 (d,  $J$  = 7.8 Hz, 2H), 7.69 (d,  $J$  = 9.0 Hz, 0.28H), 7.64–7.59 (m, 1.16H), 7.31 (s, 1.12H), 2.48 (s, 3H), 2.41 (s, 0.45H), 2.31 (s, 3H), 2.27 (s, 0.45H) ppm;  $^{13}\text{C}\{^1\text{H}\}$  NMR (150 MHz,  $\text{CDCl}_3$ )  $\delta$  196.6, 194.6, 149.7, 148.7, 145.4 (q,  $J$  = 3.9 Hz), 144.9 (q,  $J$  = 4.8 Hz), 143.7, 143.3, 139.4, 138.2, 136.3, 135.5, 134.8, 134.4, 133.0, 129.8, 129.4, 129.1, 128.5, 125.1, 123.7 (q,  $J$  = 272.7 Hz), 122.5, 118.8 (q,  $J$  = 32.0 Hz), 21.9, 20.6, 20.4, 19.0 ppm;  $^{19}\text{F NMR}$  (564 MHz,  $\text{CDCl}_3$ )  $\delta$  -54.9 (s, 3F), -56.9 (s, 3F) ppm; HRMS (ESI)  $m/z$ :  $[\text{M} + \text{H}]^+$  calcd for  $\text{C}_{19}\text{H}_{15}\text{F}_3\text{NO}^+$ , 330.1100; found, 330.1094.

(6,8-Dichloro-3-(trifluoromethyl)quinolin-4-yl)(phenyl)methanone (**3sa**)

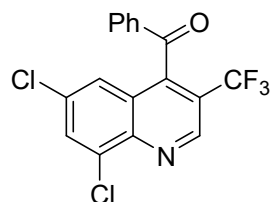

Yellow solid, 30.4 mg, 41% yield. Mp: 102–104 °C. Silica gel TLC  $R_f$  = 0.20 (PE:EA = 30:1);  $^1\text{H NMR}$  (600 MHz,  $\text{CDCl}_3$ )  $\delta$  9.29 (s, 1H), 7.97 (d,  $J$  = 1.8 Hz, 1H), 7.75–7.72 (m, 2H), 7.70–7.68 (m, 1H), 7.52–7.50 (m, 3H) ppm;  $^{13}\text{C}\{^1\text{H}\}$  NMR (150 MHz,  $\text{CDCl}_3$ )  $\delta$  192.9, 147.1 (q,  $J$  = 3.6 Hz), 144.7 (d,  $J$  = 2.3 Hz), 144.4, 136.0, 135.7, 135.5, 134.6, 133.1, 129.9, 129.4, 125.8, 124.0, 121.6 (q,  $J$  = 32.3 Hz), 123.0 (q,  $J$  = 276.6 Hz) ppm;  $^{19}\text{F NMR}$  (564 MHz,  $\text{CDCl}_3$ )  $\delta$  -57.4 (s, 3F) ppm; HRMS (ESI)  $m/z$ :  $[\text{M} + \text{H}]^+$  calcd for  $\text{C}_{17}\text{H}_9\text{Cl}_2\text{F}_3\text{NO}^+$ , 370.0008; found, 370.0010.

(5,7-Difluoro-3-(trifluoromethyl)quinolin-4-yl)(phenyl)methanone (**3ua**)

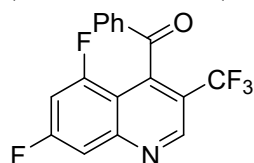

Yellow solid, 38.4 mg, 57% yield. Mp: 106–107 °C. Silica gel TLC  $R_f$  = 0.20 (PE:EA = 30:1);  $^1\text{H NMR}$  (600 MHz,  $\text{CDCl}_3$ )  $\delta$  9.22 (s, 1H), 7.77–7.73 (m, 3H), 7.65–7.62 (m, 1H), 7.49–7.47 (m, 2H), 7.12–7.08 (m, 1H) ppm;  $^{13}\text{C}\{^1\text{H}\}$  NMR (150 MHz,  $\text{CDCl}_3$ )  $\delta$  192.6, 164.0 (dd,  $J$  = 254.6 Hz,  $J$  = 14.0 Hz), 158.7 (dd,  $J$  = 261.5 Hz,  $J$  = 14.0 Hz), 150.8 (d,  $J$  = 12.6 Hz), 148.8 (q,  $J$  = 2.6 Hz), 142.6, 135.9, 134.6, 129.3, 129.1, 123.2 (q,  $J$  = 273.6 Hz), 120.5 (q,  $J$  = 31.4 Hz), 110.9 (d,  $J$  = 4.8 Hz), 110.8 (q,  $J$  = 4.4 Hz), 105.6, 105.4 (d,  $J$  = 4.5 Hz), 105.2 ppm;  $^{19}\text{F NMR}$  (564 MHz,  $\text{CDCl}_3$ )  $\delta$  -62.9(s, 1F), -64.1(s, 1F), -70.1 (s, 3F) ppm; HRMS (ESI)  $m/z$ :  $[\text{M} + \text{H}]^+$  calcd for  $\text{C}_{17}\text{H}_9\text{F}_5\text{NO}^+$ , 338.0599; found, 338.0600.

(5,7-Dimethyl-3-(trifluoromethyl)quinolin-4-yl)(phenyl)methanone (**3va**)

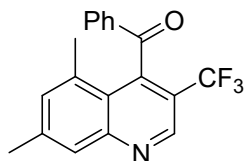

Yellow solid, 52.1 mg, 79% yield. Mp: 110–112 °C. Silica gel TLC  $R_f$  = 0.20 (PE:EA = 30:1);  $^1\text{H NMR}$  (600 MHz,  $\text{CDCl}_3$ )  $\delta$  9.04 (s, 1H), 7.83 (s, 1H), 7.54–7.51 (m, 1H), 7.37 (s, 4H), 7.16 (s, 1H), 2.44 (s, 3H), 2.25 (s, 3H) ppm;  $^{13}\text{C}\{^1\text{H}\}$  NMR (150 MHz,  $\text{CDCl}_3$ )  $\delta$  196.2, 151.2, 145.9 (q,  $J$  = 4.1 Hz), 144.5 (q,  $J$  = 3.2 Hz), 142.6, 137.6, 135.4, 134.5, 134.2, 129.1, 128.3, 123.7 (q,  $J$  = 273.8 Hz), 121.5, 119.9 (q,  $J$  = 30.9 Hz), 23.7, 21.7 ppm;  $^{19}\text{F NMR}$  (564 MHz,  $\text{CDCl}_3$ )  $\delta$  -55.2 (s, 3F) ppm; HRMS (ESI)  $m/z$ :  $[\text{M} + \text{H}]^+$  calcd for  $\text{C}_{19}\text{H}_{15}\text{F}_3\text{NO}^+$ , 330.1100; found, 330.1107.

*o*-Tolyl(3-(trifluoromethyl)quinolin-4-yl)methanone (**3ab**)

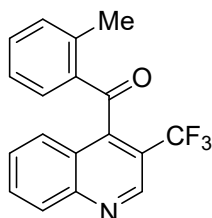

Yellow solid, 47.9 mg, 76% yield. Mp: 120–122 °C. Silica gel TLC  $R_f$  = 0.20 (PE:EA = 15:1);  $^1\text{H NMR}$  (400 MHz,  $\text{CDCl}_3$ )  $\delta$  9.18 (s, 1H), 8.26–8.23 (m, 1H), 7.88–7.84 (m, 1H), 7.68–7.66 (m, 1H), 7.60–7.56 (m, 1H), 7.50–7.45 (m, 1H), 7.41–7.39 (m, 1H), 7.17–7.10 (m, 2H), 2.83 (s, 3H) ppm;  $^{13}\text{C}\{^1\text{H}\}$  NMR (100 MHz,  $\text{CDCl}_3$ )  $\delta$  195.5, 149.5, 146.6 (q,  $J$  = 4.2 Hz), 146.2 (q,  $J$  = 3.6 Hz), 141.4, 134.7, 133.7, 132.8, 132.2, 130.2, 128.8, 126.4, 126.1, 124.1, 123.6 (q,  $J$  = 273.1 Hz), 119.2 (q,  $J$  = 31.9 Hz), 22.4 ppm;  $^{19}\text{F NMR}$  (376 MHz,  $\text{CDCl}_3$ )  $\delta$  -57.2 (s, 3F) ppm; HRMS (ESI)  $m/z$ :  $[\text{M} + \text{H}]^+$  calcd for  $\text{C}_{18}\text{H}_{13}\text{F}_3\text{NO}^+$ , 316.0944; found, 316.0947.

*m*-Tolyl(3-(trifluoromethyl)quinolin-4-yl)methanone (**3ac**)

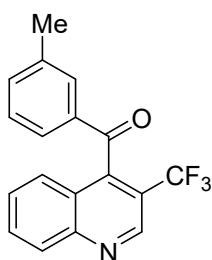

Yellow solid, 51.7 mg, 82% yield. Mp: 102–103 °C. Silica gel TLC  $R_f$  = 0.20 (PE:EA = 15:1);  $^1\text{H NMR}$  (400 MHz,  $\text{CDCl}_3$ )  $\delta$  9.20 (s, 1H), 8.26–8.24 (m, 1H), 7.89–7.84 (m, 1H), 7.65–7.61 (m, 2H), 7.57–7.53 (m, 1H), 7.50–7.44 (m, 2H), 7.35–7.31 (m, 1H), 2.37 (s, 3H) ppm;  $^{13}\text{C}\{^1\text{H}\}$  NMR (100 MHz,  $\text{CDCl}_3$ )  $\delta$  194.3, 149.4, 146.5 (q,  $J$  = 6.0 Hz), 145.1 (q,  $J$  = 3.6 Hz), 139.2, 136.2, 135.8, 132.2, 130.2, 129.9, 129.0, 128.8, 127.4, 126.3, 124.0, 123.5 (q,  $J$  = 272.9 Hz), 119.7 (q,  $J$  = 32.0 Hz), 21.4 ppm;



$^{19}\text{F}$  NMR (376 MHz,  $\text{CDCl}_3$ )  $\delta$  -57.1 (s, 3F) ppm; HRMS (ESI)  $m/z$ :  $[\text{M} + \text{H}]^+$  calcd for  $\text{C}_{18}\text{H}_{13}\text{F}_3\text{NO}^+$ , 316.0944; found, 316.0943.

*p*-Tolyl(3-(trifluoromethyl)quinolin-4-yl)methanone (**3ad**)

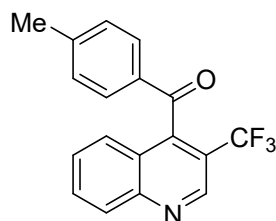

Yellow oil, 53.6 mg, 85% yield. Silica gel TLC  $R_f$  = 0.20 (PE:EA = 50:1);  $^1\text{H}$  NMR (400 MHz,  $\text{CDCl}_3$ )  $\delta$  9.21 (s, 1H), 8.27–8.24 (m, 1H), 7.88–7.84 (m, 1H), 7.68–7.62 (m, 3H), 7.58–7.54 (m, 1H), 7.28–7.27 (m, 2H), 2.43 (s, 3H) ppm;  $^{13}\text{C}\{^1\text{H}\}$  NMR (100 MHz,  $\text{CDCl}_3$ )  $\delta$  193.7, 149.3, 146.4 (q,  $J$  = 4.1 Hz), 146.3, 145.2 (q,  $J$  = 2.4 Hz), 133.9, 132.2, 130.2, 130.0, 129.9, 128.8, 126.4, 124.0, 123.5 (q,  $J$  = 272.9 Hz), 119.7 (q,  $J$  = 31.7 Hz), 22.0 ppm;  $^{19}\text{F}$  NMR (376 MHz,  $\text{CDCl}_3$ )  $\delta$  -57.1 (s, 3F) ppm; HRMS (ESI)  $m/z$ :  $[\text{M} + \text{H}]^+$  calcd for  $\text{C}_{18}\text{H}_{13}\text{F}_3\text{NO}^+$ , 316.0944; found, 316.0951.

(4-Methoxyphenyl)(3-(trifluoromethyl)quinolin-4-yl)methanone (**3ae**)

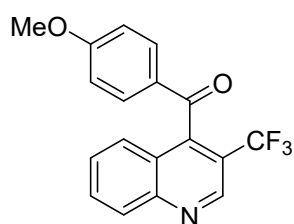

White solid, 46.4 mg, 70% yield. Mp: 111–113 °C. Silica gel TLC  $R_f$  = 0.20 (PE:EA = 100:1);  $^1\text{H}$  NMR (600 MHz,  $\text{CDCl}_3$ )  $\delta$  9.19 (s, 1H), 8.24–8.23 (m, 1H), 7.86–7.84 (m, 1H), 7.73 (s, 2H), 7.65–7.64 (m, 1H), 7.57–7.54 (m, 1H), 6.93–6.92 (m, 2H), 3.86 (s, 3H) ppm;  $^{13}\text{C}\{^1\text{H}\}$  NMR (150 MHz,  $\text{CDCl}_3$ )  $\delta$  192.4, 165.0, 149.4, 146.5 (q,  $J$  = 4.1 Hz), 145.3 (q,  $J$  = 2.4 Hz), 132.3, 132.2, 130.2, 129.5, 128.7, 126.4, 124.1, 123.5 (q,  $J$  = 269.6 Hz), 119.6 (q,  $J$  = 32.0 Hz), 114.5, 55.8 ppm;  $^{19}\text{F}$  NMR (564 MHz,  $\text{CDCl}_3$ )  $\delta$  -57.2 (s, 3F) ppm; HRMS (ESI)  $m/z$ :  $[\text{M} + \text{H}]^+$  calcd for  $\text{C}_{18}\text{H}_{13}\text{F}_3\text{NO}_2^+$ , 332.0893; found, 332.0896.

(4-Propylphenyl)(3-(trifluoromethyl)quinolin-4-yl)methanone (**3af**)

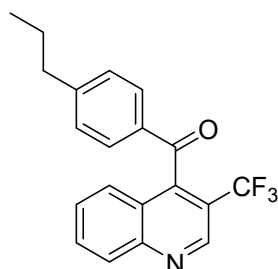

Yellow oil, 57.0 mg, 83% yield. Silica gel TLC  $R_f$  = 0.20 (PE:EA = 50:1);  $^1\text{H}$  NMR (400 MHz,  $\text{CDCl}_3$ )  $\delta$  9.21 (s, 1H), 8.26–8.24 (m, 1H), 7.88–7.84 (m, 1H), 7.70–7.63

(m, 3H), 7.58–7.54 (m, 1H), 7.28–7.27 (m, 2H), 2.65 (t,  $J = 7.6$  Hz, 2H), 1.71–1.62 (m, 2H), 0.95 (t,  $J = 7.6$  Hz, 3H) ppm;  $^{13}\text{C}\{^1\text{H}\}$  NMR (100 MHz,  $\text{CDCl}_3$ )  $\delta$  193.7, 150.8, 149.4, 146.4 (q,  $J = 3.7$  Hz), 145.2 (q,  $J = 2.3$  Hz), 134.1, 132.2, 130.2, 129.9, 129.2, 128.7, 127.6, 126.4, 124.0, 123.5 (q,  $J = 273.0$  Hz), 119.6 (q,  $J = 32.1$  Hz), 38.3, 24.1, 13.9 ppm;  $^{19}\text{F}$  NMR (376 MHz,  $\text{CDCl}_3$ )  $\delta$  -57.1 (s, 3F) ppm; HRMS (ESI)  $m/z$ :  $[\text{M} + \text{H}]^+$  calcd for  $\text{C}_{20}\text{H}_{17}\text{F}_3\text{NO}^+$ , 344.1257; found, 344.1255.

(2-Fluorophenyl)(3-(trifluoromethyl)quinolin-4-yl)methanone (**3ag**)

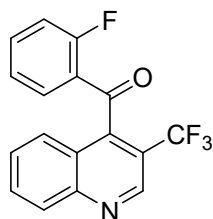

Yellow solid, 34.5 mg, 54% yield. Mp: 45–46 °C. Silica gel TLC  $R_f = 0.20$  (PE:EA = 30:1);  $^1\text{H}$  NMR (400 MHz,  $\text{CDCl}_3$ )  $\delta$  9.18 (s, 1H), 8.25–8.23 (m, 1H), 8.08–8.05 (m, 1H), 7.86–7.84 (m, 1H), 7.65–7.61 (m, 2H), 7.58–7.55 (m, 1H), 7.35–7.32 (m, 2H) ppm;  $^{13}\text{C}\{^1\text{H}\}$  NMR (100 MHz,  $\text{CDCl}_3$ )  $\delta$  190.3, 162.5 (d,  $J = 259.1$  Hz), 149.4, 146.4 (q,  $J = 4.1$  Hz), 136.5 (d,  $J = 9.2$  Hz), 132.0, 131.0, 130.2, 128.6, 125.3, 124.9 (d,  $J = 3.8$  Hz), 123.1 (d,  $J = 2.0$  Hz), 123.4 (q,  $J = 272.7$  Hz), 118.4 (q,  $J = 29.7$  Hz), 117.3, 117.1 ppm;  $^{19}\text{F}$  NMR (376 MHz,  $\text{CDCl}_3$ )  $\delta$  -57.2 (s, 3F), -108.3 (s, 1F) ppm; HRMS (ESI)  $m/z$ :  $[\text{M} + \text{H}]^+$  calcd for  $\text{C}_{17}\text{H}_{10}\text{F}_4\text{NO}^+$ , 320.0693; found, 320.0701.

(3-Fluorophenyl)(3-(trifluoromethyl)quinolin-4-yl)methanone (**3ah**)

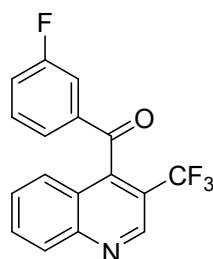

Yellow oil, 53.0 mg, 83% yield. Silica gel TLC  $R_f = 0.20$  (PE:EA = 30:1);  $^1\text{H}$  NMR (400 MHz,  $\text{CDCl}_3$ )  $\delta$  9.22 (s, 1H), 8.28–8.26 (m, 1H), 7.91–7.87 (m, 1H), 7.59–7.58 (m, 2H), 7.56–7.54 (m, 1H), 7.45–7.43 (m, 2H), 7.37–7.32 (m, 1H) ppm;  $^{13}\text{C}\{^1\text{H}\}$  NMR (100 MHz,  $\text{CDCl}_3$ )  $\delta$  193.0, 163.1 (d,  $J = 372.5$  Hz), 149.4, 146.4 (q,  $J = 4.3$  Hz), 144.1 (q,  $J = 2.1$  Hz), 138.1, 132.4, 131.0 (d,  $J = 7.6$  Hz), 130.4, 129.1, 126.0, 125.9 (d,  $J = 3.0$  Hz), 123.8, 123.4 (q,  $J = 274.2$  Hz), 122.2, 122.0, 119.8 (q,  $J = 29.7$  Hz), 116.0, 115.8 ppm;  $^{19}\text{F}$  NMR (376 MHz,  $\text{CDCl}_3$ )  $\delta$  -57.0 (s, 3F), -110.6 (s, 1F) ppm; HRMS (ESI)  $m/z$ :  $[\text{M} + \text{H}]^+$  calcd for  $\text{C}_{17}\text{H}_{10}\text{F}_4\text{NO}^+$ , 320.0693; found, 320.0703.

(4-Fluorophenyl)(3-(trifluoromethyl)quinolin-4-yl)methanone (**3ai**)

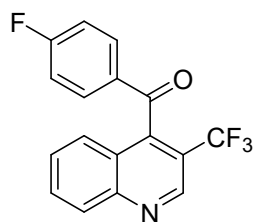

Yellow solid, 55.0 mg, 86% yield. Mp: 119–121 °C. Silica gel TLC  $R_f$  = 0.20 (PE:EA = 30:1);  $^1\text{H NMR}$  (600 MHz,  $\text{CDCl}_3$ )  $\delta$  9.20 (s, 1H), 8.26–8.24 (m, 1H), 7.88–7.85 (m, 1H), 7.81–7.79 (m, 2H), 7.60–7.56 (m, 2H), 7.15–7.13 (m, 2H) ppm;  $^{13}\text{C}\{^1\text{H}\}$  NMR (150 MHz,  $\text{CDCl}_3$ )  $\delta$  192.5, (d,  $J$  = 256.8 Hz), 149.4, 146.4 (q,  $J$  = 4.2 Hz), 144.4 (q,  $J$  = 2.4 Hz), 132.8, 132.6 (d,  $J$  = 9.8 Hz), 132.3, 130.3, 129.0, 126.1, 123.8, 123.4 (q,  $J$  = 272.9 Hz), 119.7 (q,  $J$  = 32.0 Hz), 116.6, 116.5 ppm;  $^{19}\text{F NMR}$  (564 MHz,  $\text{CDCl}_3$ )  $\delta$  -57.1 (s, 3F), -101.4 (s, 1F) ppm; HRMS (ESI)  $m/z$ :  $[\text{M} + \text{H}]^+$  calcd for  $\text{C}_{17}\text{H}_{10}\text{ClF}_3\text{NO}^+$ , 320.0693; found, 320.0698.

(2-Chlorophenyl)(3-(trifluoromethyl)quinolin-4-yl)methanone (**3aj**)

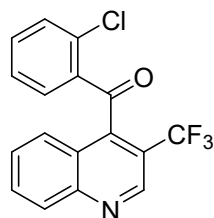

Yellow solid, 43.0 mg, 64% yield. Mp: 142–143 °C. Silica gel TLC  $R_f$  = 0.20 (PE:EA = 30:1);  $^1\text{H NMR}$  (600 MHz,  $\text{CDCl}_3$ )  $\delta$  9.18 (s, 1H), 8.25–8.24 (m, 1H), 7.89–7.86 (m, 1H), 7.70–7.67 (m, 2H), 7.61–7.59 (m, 1H), 7.54–7.49 (m, 2H), 7.36–7.34 (m, 1H) ppm;  $^{13}\text{C}\{^1\text{H}\}$  NMR (150 MHz,  $\text{CDCl}_3$ )  $\delta$  192.3, 149.6, 146.5 (q,  $J$  = 4.4 Hz), 134.9, 134.8, 134.4, 133.2, 132.2 (d,  $J$  = 5.6 Hz), 130.3, 129.0, 127.3, 125.8, 123.8, 123.5 (q,  $J$  = 272.9 Hz), 119.1 (q,  $J$  = 32.0 Hz) ppm;  $^{19}\text{F NMR}$  (564 MHz,  $\text{CDCl}_3$ )  $\delta$  -57.1 (s, 3F) ppm; HRMS (ESI)  $m/z$ :  $[\text{M} + \text{H}]^+$  calcd for  $\text{C}_{17}\text{H}_{10}\text{ClF}_3\text{NO}^+$ , 336.0398; found, 336.0411.

(4-Chlorophenyl)(3-(trifluoromethyl)quinolin-4-yl)methanone (**3ak**)

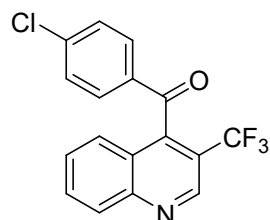

Yellow oil, 47.0 mg, 70% yield. Silica gel TLC  $R_f$  = 0.20 (PE:EA = 50:1);  $^1\text{H NMR}$  (400 MHz,  $\text{CDCl}_3$ )  $\delta$  9.21 (s, 1H), 8.27–8.25 (m, 1H), 7.91–7.84 (m, 1H), 7.72–7.70 (m, 2H), 7.58–7.57 (m, 2H), 7.46–7.44 (m, 2H) ppm;  $^{13}\text{C}\{^1\text{H}\}$  NMR (100 MHz,  $\text{CDCl}_3$ )  $\delta$  192.9, 149.5, 146.4 (q,  $J$  = 1.8 Hz), 146.4 (q,  $J$  = 2.3 Hz), 141.7, 134.6, 132.4, 131.1, 130.4, 129.6, 129.0, 126.0, 123.8, 123.4 (q,  $J$  = 272.9 Hz), 122.0, 119.7 (q,  $J$  = 32.2 Hz) ppm;  $^{19}\text{F NMR}$  (376 MHz,  $\text{CDCl}_3$ )  $\delta$  -57.1 (s, 3F) ppm; HRMS (ESI)

$m/z$ :  $[M + H]^+$  calcd for  $C_{17}H_{10}ClF_3NO^+$ , 336.0398; found, 336.0400.

(4-Nitrophenyl)(3-(trifluoromethyl)quinolin-4-yl)methanone (**3al**)

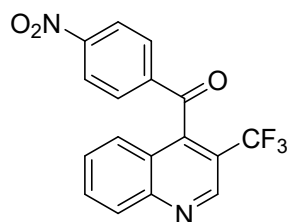

Yellow oil, 40.2 mg, 58% yield. Silica gel TLC  $R_f$  = 0.20 (PE:EA = 30:1);  $^1H$  NMR (600 MHz,  $CDCl_3$ )  $\delta$  9.25 (s, 1H), 8.34–8.30 (m, 3H), 7.96–7.90 (m, 3H), 7.63–7.60 (m, 1H), 7.55–7.53 (m, 2H) ppm;  $^{13}C\{^1H\}$  NMR (150 MHz,  $CDCl_3$ )  $\delta$  192.7, 151.3, 149.5, 146.4 (q,  $J$  = 4.1 Hz), 143.4 (q,  $J$  = 2.3 Hz), 140.1, 132.7, 130.7, 130.5, 129.4, 125.6, 125.3, 124.5, 124.0, 123.5, 123.3 (q,  $J$  = 272.9 Hz), 119.8 (q,  $J$  = 32.1 Hz) ppm;  $^{19}F$  NMR (564 MHz,  $CDCl_3$ )  $\delta$  -56.9 (s, 3F) ppm; HRMS (ESI)  $m/z$ :  $[M + H]^+$  calcd for  $C_{17}H_{10}F_3N_2O_3^+$ , 347.0638; found, 347.0640.

(4-Bromophenyl)(3-(trifluoromethyl)quinolin-4-yl)methanone (**3am**)

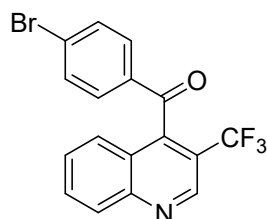

Yellow solid, 57.8 mg, 76% yield. Mp: 137–140 °C. Silica gel TLC  $R_f$  = 0.20 (PE:EA = 40:1);  $^1H$  NMR (600 MHz,  $CDCl_3$ )  $\delta$  9.20 (s, 1H), 8.26 (d,  $J$  = 8.4 Hz, 1H), 7.89–7.86 (m, 1H), 7.62 (s, 4H), 7.58–7.57 (m, 2H) ppm;  $^{13}C\{^1H\}$  NMR (150 MHz,  $CDCl_3$ )  $\delta$  193.1, 149.4, 146.4 (q,  $J$  = 4.1 Hz), 144.2 (q,  $J$  = 2.4 Hz), 135.0, 132.6, 132.4, 130.4, 129.0, 126.0, 123.8, 123.4 (q,  $J$  = 272.9 Hz), 119.7 (q,  $J$  = 32.0 Hz) ppm;  $^{19}F$  NMR (564 MHz,  $CDCl_3$ )  $\delta$  -57.1 (s, 3F) ppm; HRMS (ESI)  $m/z$ :  $[M + H]^+$  calcd for  $C_{17}H_{10}BrF_3NO^+$ , 379.9892; found, 379.9896.

4-(3-(Trifluoromethyl)quinoline-4-carbonyl)phenyl(*R*)-2-(4-isopropylphenyl)propanoate (**3an**)

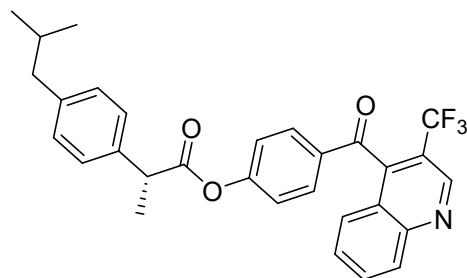

Yellow oil, 72.8 mg, 72% yield. Silica gel TLC  $R_f$  = 0.20 (PE:EA = 30:1);  $^1H$  NMR (600 MHz,  $CDCl_3$ )  $\delta$  9.23 (s, 1H), 8.29–8.28 (m, 1H), 7.91–7.88 (m, 1H), 7.62–7.58 (m, 3H), 7.43–7.41 (m, 2H), 7.29–7.28 (m, 3H), 7.17–7.15 (m, 2H), 3.97–3.94 (m,

1H), 2.50–2.49 (m, 2H), 1.92–1.86 (m, 1H), 1.63–1.61 (m, 3H), 0.94–0.93 (m, 6H) ppm;  $^{13}\text{C}\{^1\text{H}\}$  NMR (150 MHz,  $\text{CDCl}_3$ )  $\delta$  193.2, 172.9, 151.6, 149.4, 146.4 (q,  $J = 2.1$  Hz), 144.3 (q,  $J = 2.3$  Hz), 141.2, 137.4, 136.9, 132.3, 130.1, 129.7, 129.0, 128.3, 127.7, 127.3, 126.2, 123.4 (q,  $J = 273.0$  Hz), 121.9, 45.3, 45.2, 30.3, 22.5, 18.6, 18.5 ppm;  $^{19}\text{F}$  NMR (564 MHz,  $\text{CDCl}_3$ )  $\delta$  -57.0 (s, 3F) ppm; HRMS (ESI)  $m/z$ :  $[\text{M} + \text{H}]^+$  calcd for  $\text{C}_{29}\text{H}_{25}\text{F}_3\text{NO}_3^+$ , 506.1938; found, 506.1937.

Naphthalen-1-yl(3-(trifluoromethyl)quinolin-4-yl)methanone (**3ao**)

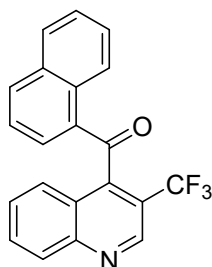

Yellow oil, 51.3 mg, 73% yield. Silica gel TLC  $R_f = 0.20$  (PE:EA = 20:1);  $^1\text{H}$  NMR (400 MHz,  $\text{CDCl}_3$ )  $\delta$  9.47 (d, 1H,  $J = 8.4$  Hz), 9.25 (s, 1H), 8.29–8.27 (m, 1H), 8.12–8.10 (m, 1H), 7.99–7.97 (m, 1H), 7.89–7.80 (m, 2H), 7.76–7.74 (m, 1H), 7.70–7.66 (m, 1H), 7.57–7.53 (m, 1H), 7.49–7.47 (m, 1H), 7.37–7.33 (m, 1H) ppm;  $^{13}\text{C}\{^1\text{H}\}$  NMR (100 MHz,  $\text{CDCl}_3$ )  $\delta$  195.7, 149.6 (q,  $J = 3.4$  Hz), 146.6 (q,  $J = 6.3$  Hz), 146.1, 136.1, 135.4, 134.2, 132.2, 132.0, 130.8, 129.9, 129.0, 128.9, 127.4, 126.5, 126.3, 125.0, 124.4, 123.6 (q,  $J = 273.2$  Hz), 119.4 (q,  $J = 34.5$  Hz) ppm;  $^{19}\text{F}$  NMR (376 MHz,  $\text{CDCl}_3$ )  $\delta$  -57.0 (s, 3F) ppm; HRMS (ESI)  $m/z$ :  $[\text{M} + \text{H}]^+$  calcd for  $\text{C}_{21}\text{H}_{13}\text{F}_3\text{NO}^+$ , 352.0944; found, 352.0941.

Thiophen-2-yl(3-(trifluoromethyl)quinolin-4-yl)methanone (**3ap**)

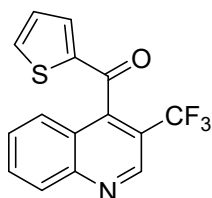

Yellow oil, 43.0 mg, 70% yield. Silica gel TLC  $R_f = 0.20$  (PE:EA = 20:1);  $^1\text{H}$  NMR (400 MHz,  $\text{CDCl}_3$ )  $\delta$  9.20 (s, 1H), 8.26–8.24 (m, 1H), 7.90–7.84 (m, 2H), 7.77–7.75 (m, 1H), 7.63–7.59 (m, 1H), 7.21–7.20 (m, 1H), 7.10–7.08 (m, 1H) ppm;  $^{13}\text{C}\{^1\text{H}\}$  NMR (100 MHz,  $\text{CDCl}_3$ )  $\delta$  185.7, 149.5, 146.4 (q,  $J = 4.0$  Hz), 144.1 (q,  $J = 2.4$  Hz), 143.6, 136.9, 136.5, 132.3, 130.1, 128.9, 127.5, 126.3, 123.8, 123.4 (q,  $J = 273.0$  Hz), 119.5 (q,  $J = 31.9$  Hz) ppm;  $^{19}\text{F}$  NMR (376 MHz,  $\text{CDCl}_3$ )  $\delta$  -57.1 (s, 3F) ppm; HRMS (ESI)  $m/z$ :  $[\text{M} + \text{H}]^+$  calcd for  $\text{C}_{15}\text{H}_9\text{F}_3\text{NOS}^+$ , 308.0351; found, 308.0358.

(3-(Trifluoromethyl)quinolin-4-yl)(triisopropylsilyl)methanone (**3aq**)

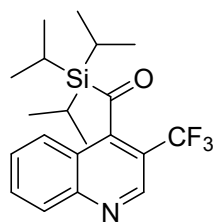

Yellow oil, 32.0 mg, 42% yield. Silica gel TLC  $R_f$  = 0.20 (PE:EA = 40:1);  $^1\text{H NMR}$  (600 MHz,  $\text{CDCl}_3$ )  $\delta$  9.01 (s, 1H), 8.21–8.20 (m, 1H), 7.86–7.84 (m, 1H), 7.68–7.66 (m, 1H), 7.62–7.60 (m, 1H), 1.04 (s, 21H) ppm;  $^{13}\text{C}\{^1\text{H}\}$  NMR (150 MHz,  $\text{CDCl}_3$ )  $\delta$  191.6, 152.1, 149.5, 146.9 (q,  $J$  = 3.9 Hz), 132.1, 130.6, 128.1, 125.7, 123.8 (q,  $J$  = 273.2 Hz), 122.4, 117.0 (q,  $J$  = 32.0 Hz), 18.5, 17.8, 12.4, 11.4 ppm;  $^{19}\text{F NMR}$  (564 MHz,  $\text{CDCl}_3$ )  $\delta$  -54.8 (s, 3F) ppm; HRMS (ESI)  $m/z$ :  $[\text{M} + \text{H}]^+$  calcd for  $\text{C}_{20}\text{H}_{27}\text{F}_3\text{NOSi}^+$ , 382.1809; found, 382.1819.

#### 4-Chloro-1-(3-(trifluoromethyl)quinolin-4-yl)butan-1-one (**3ar**)

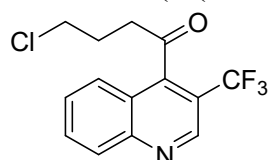

Yellow oil, 16.9 mg, 28% yield. Silica gel TLC  $R_f$  = 0.30 (PE:EA = 20:1);  $^1\text{H NMR}$  (600 MHz,  $\text{CDCl}_3$ )  $\delta$  9.12 (s, 1H), 8.23–8.22 (m, 1H), 7.91–7.88 (m, 1H), 7.71–7.67 (m, 2H), 3.74–3.71 (m, 2H), 3.14–3.12 (m, 2H), 3.34–2.32 (m, 2H) ppm;  $^{13}\text{C}\{^1\text{H}\}$  NMR (150 MHz,  $\text{CDCl}_3$ )  $\delta$  203.0, 149.6, 146.3 (q,  $J$  = 3.9 Hz), 146.1 (q,  $J$  = 2.3 Hz), 132.4, 130.5, 129.1, 125.0, 123.6 (q,  $J$  = 272.7 Hz), 122.4, 117.9 (q,  $J$  = 32.0 Hz), 43.9, 42.0, 26.0 ppm;  $^{19}\text{F NMR}$  (564 MHz,  $\text{CDCl}_3$ )  $\delta$  -57.1 (s, 3F) ppm; HRMS (ESI)  $m/z$ :  $[\text{M} + \text{H}]^+$  calcd for  $\text{C}_{14}\text{H}_{12}\text{ClF}_3\text{NO}^+$ , 302.0544; found, 302.0548.

## 7. Characterization data for compound 4

#### 4-Benzoyl-3-(trifluoromethyl)quinoline 1-oxide 4

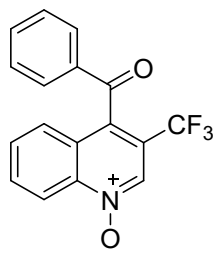

White solid, 29.8 mg, 94% yield. Mp: 172–174 °C. Silica gel TLC  $R_f$  = 0.20 (PE:EA = 1:1);  $^1\text{H NMR}$  (400 MHz,  $\text{CDCl}_3$ )  $\delta$  8.83 (d, 1H,  $J$  = 8.80 Hz), 8.78 (s, 1H), 7.91–7.87 (m, 1H), 7.81–7.80 (m, 2H), 7.68–7.64 (m, 3H), 7.52–7.48 (m, 2H) ppm;  $^{13}\text{C}\{^1\text{H}\}$  NMR (100 MHz,  $\text{CDCl}_3$ )  $\delta$  193.0, 142.7 (q,  $J$  = 2.5 Hz), 136.3 (q,  $J$  = 1.4 Hz), 135.2, 135.0, 133.3, 132.9, 131.8, 130.7, 129.9, 129.3, 127.4, 127.2, 122.1 (q,  $J$  = 273.5 Hz), 122.0 (q,  $J$  = 34.1 Hz), 120.4 ppm;  $^{19}\text{F NMR}$  (376MHz,  $\text{CDCl}_3$ )  $\delta$  -58.1 (s,

3F) ppm; **HRMS** (ESI)  $m/z$ :  $[M + H]^+$  calcd for  $C_{17}H_{11}F_3NO_2^+$ , 318.0736; found, 318.0741.

## 8. Characterization data for compound 5

### 4-Benzoyl-3-(trifluoromethyl)quinolin-2(1H)-one 5

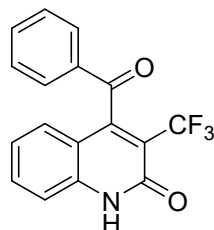

White solid, 29.8 mg, 94% yield. Mp: 270–271 °C. Silica gel TLC  $R_f$  = 0.20 (PE:EA = 2:1);  **$^1H$  NMR** (400 MHz,  $CDCl_3$ )  $\delta$  12.77 (s, 1H), 7.91–7.89 (m, 2H), 7.67–7.66 (m, 2H), 7.56–7.51 (m, 3H), 7.32–7.30 (m, 1H), 7.20–7.17 (m, 1H) ppm;  **$^{13}C\{^1H\}$  NMR** (100 MHz,  $CDCl_3$ )  $\delta$  193.0, 160.1 (q,  $J$  = 5.2 Hz), 151.1 (q,  $J$  = 4.0 Hz), 139.4, 135.5, 135.1, 133.9, 129.4, 129.3, 127.5, 124.1, 122.4 (q,  $J$  = 272.7 Hz), 117.0, 116.3 ppm;  **$^{19}F$  NMR** (376MHz,  $CDCl_3$ )  $\delta$  -59.0 (s, 3F) ppm; **HRMS** (ESI)  $m/z$ :  $[M + H]^+$  calcd for  $C_{17}H_{11}F_3NO_2^+$ , 318.0736; found, 318.0746.

## 9. References

- (1) (a) Priewisch, B.; Rück-Braun, K. Efficient Preparation of Nitrosoarenes for the Synthesis of Azobenzenes. *J. Org. Chem.* **2005**, *70*, 2350. (b) Hu, W.; Yu, J.-T.; Liu, S.; Jiang, Y.; Cheng, J. Copper-mediated Annulation of 2-(1-Arylvinyl) Anilines and Aryl Nitrosos towards 2,3-Diaryl-2H-indazoles. *Org. Chem. Front.* **2017**, *4*, 22.
- (2) Hu, C.-M.; Hong, F.; Xu, Y.-Y. Synthesis of trifluoromethyl-substituted conjugated enynes including a fluorinated siccayne. *J. Fluorine Chem.* **1993**, *64*, 1.
- (3) März, M.; Kohout, M.; Neveselý, T.; Chudoba, J.; Prukała, D.; Niziński, S.; Sikorski, M.; Burdziński, G.; Cibulka, R. Azodicarboxylate-free esterification with triphenylphosphine mediated by flavin and visible light: method development and stereoselectivity control. *Org. Biomol. Chem.* **2018**, *16*, 6809.
- (4) The information for compound **2n**, See: Zhang, J.; Ma, Z.-G.; Tian, Y.; Li, W.; Gao, W.-C.; Chang, H.-H. Divergent synthesis of fluorinated alkenes, allenes, and enynes via reaction of 2-trifluoromethyl-1,3-enynes with carbon nucleophiles. *J. Org. Chem.* **2022**, *87*, 15086.

### 10. <sup>1</sup>H NMR, <sup>13</sup>C NMR and <sup>19</sup>F NMR spectra for substrate 2n

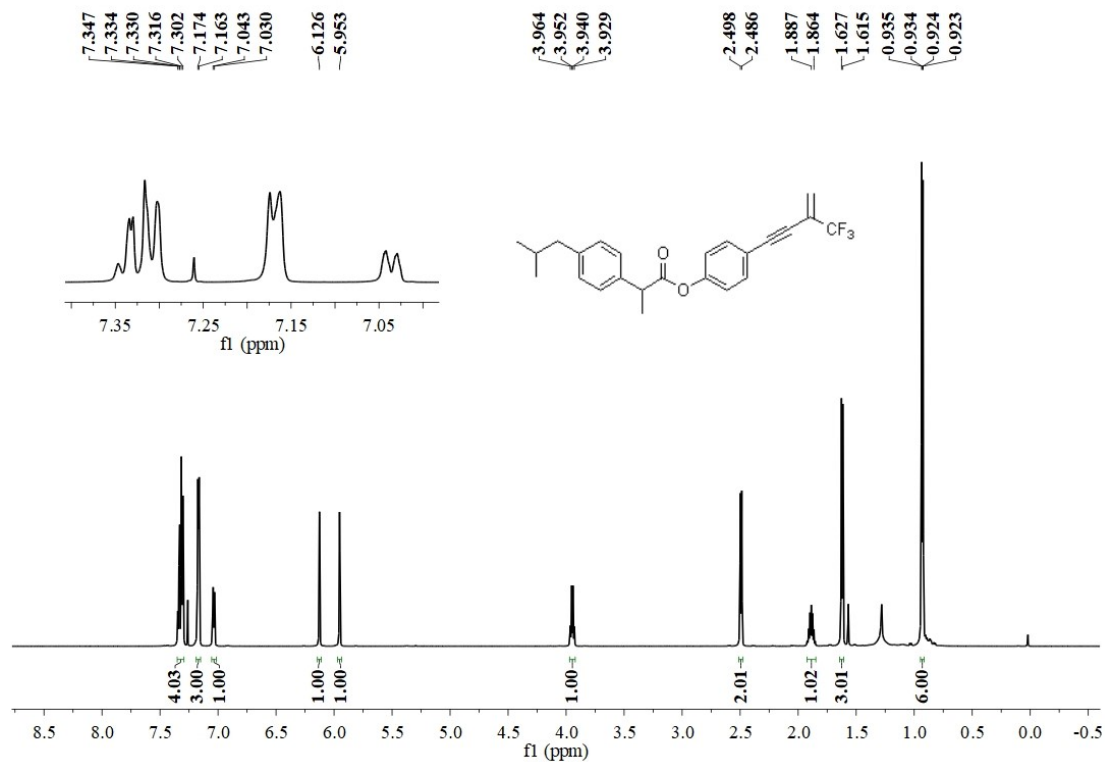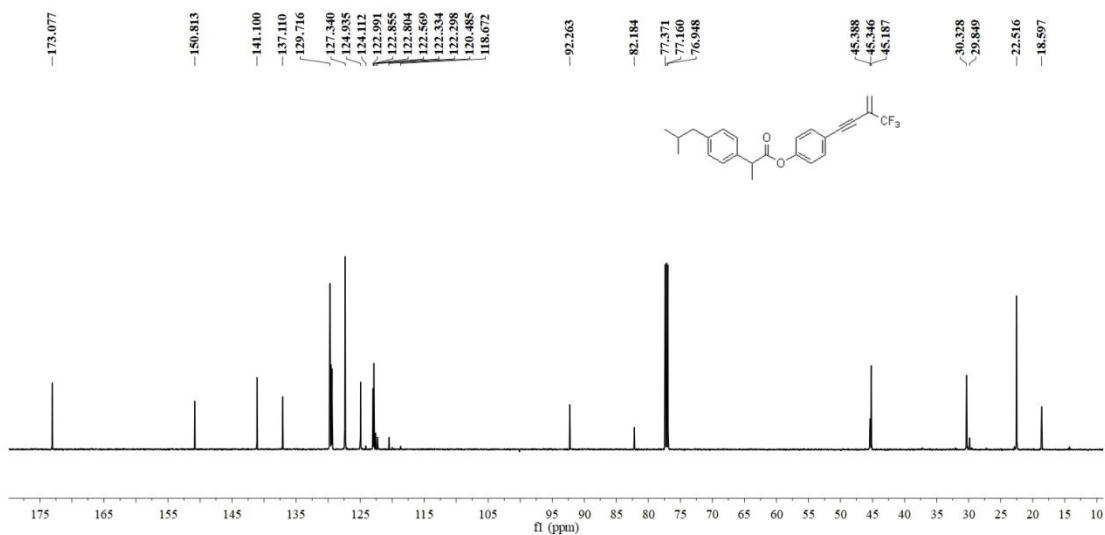



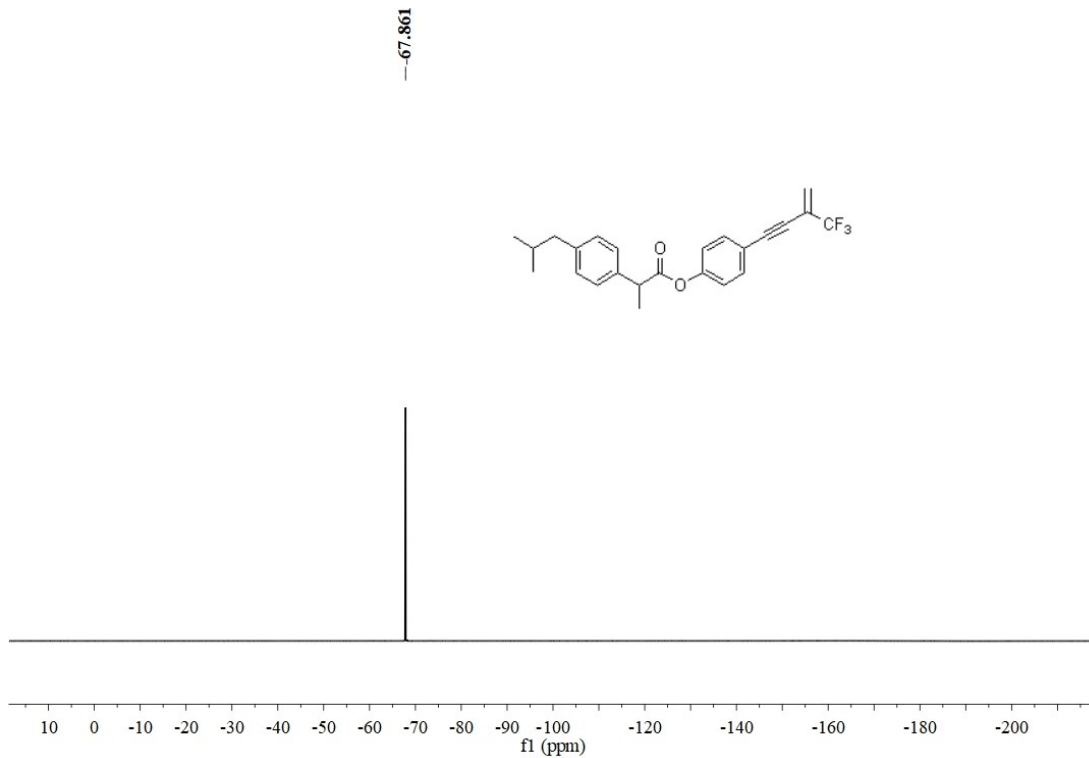

### 11. <sup>1</sup>H NMR, <sup>13</sup>C NMR and <sup>19</sup>F NMR spectra for all products 3

#### 3aa

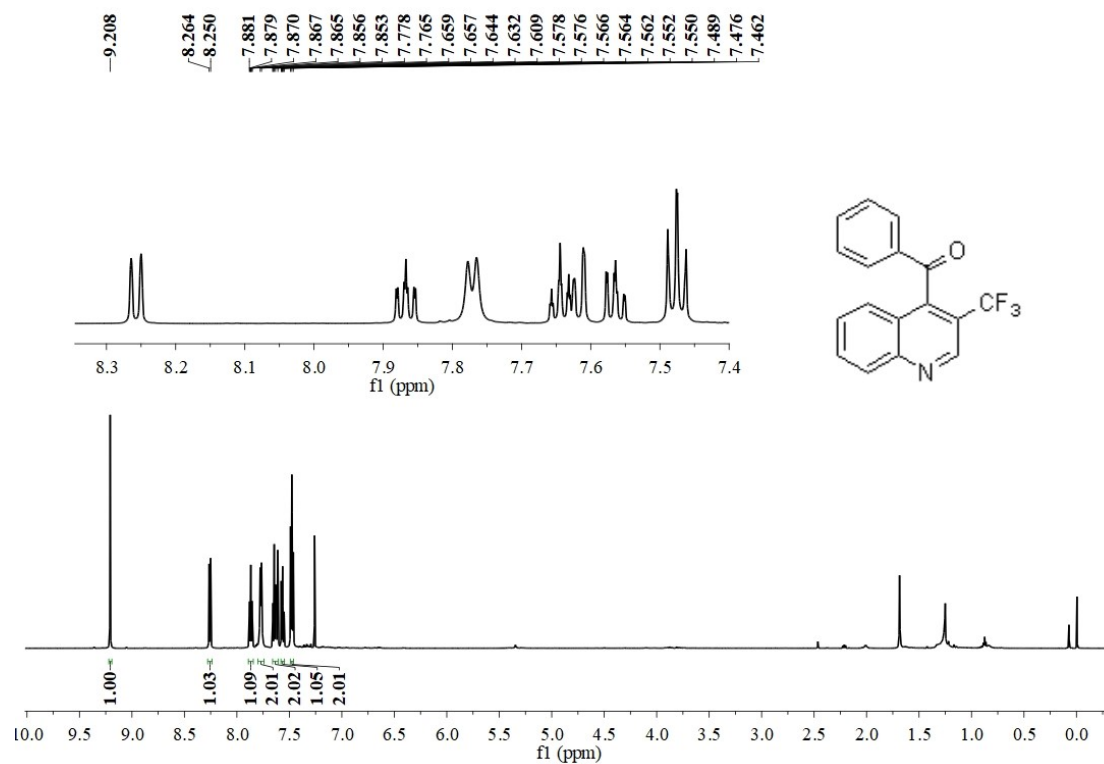

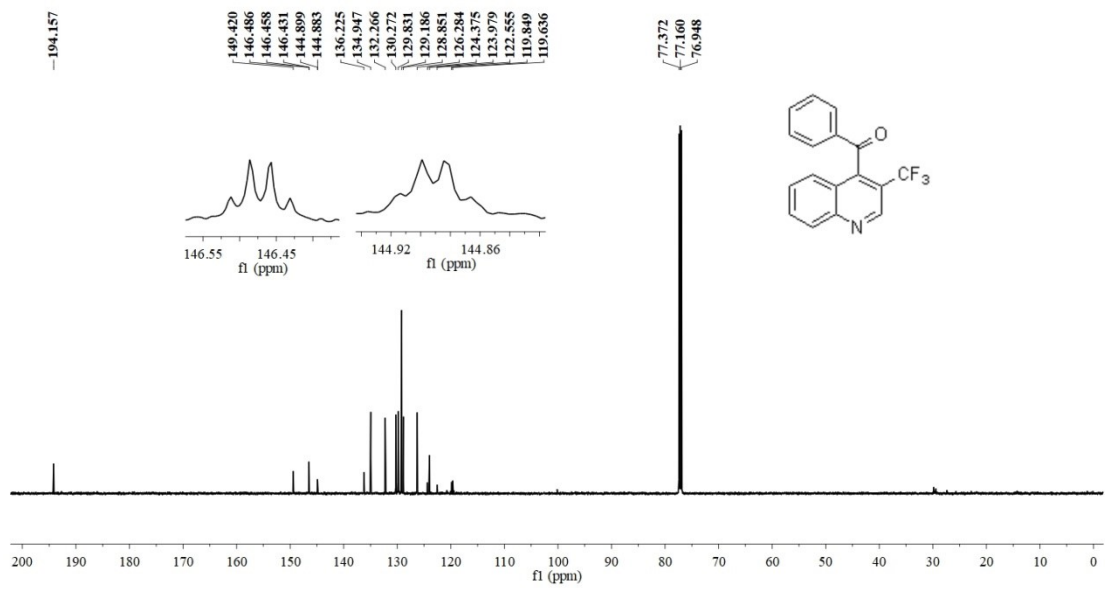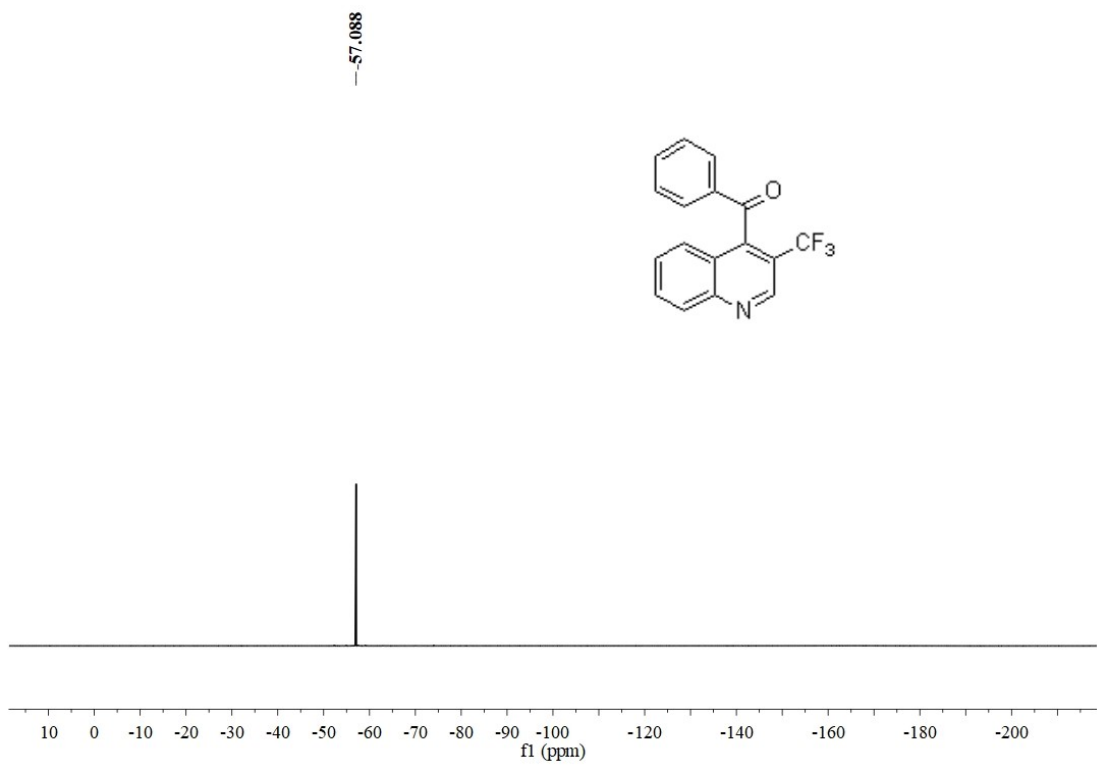

3ba

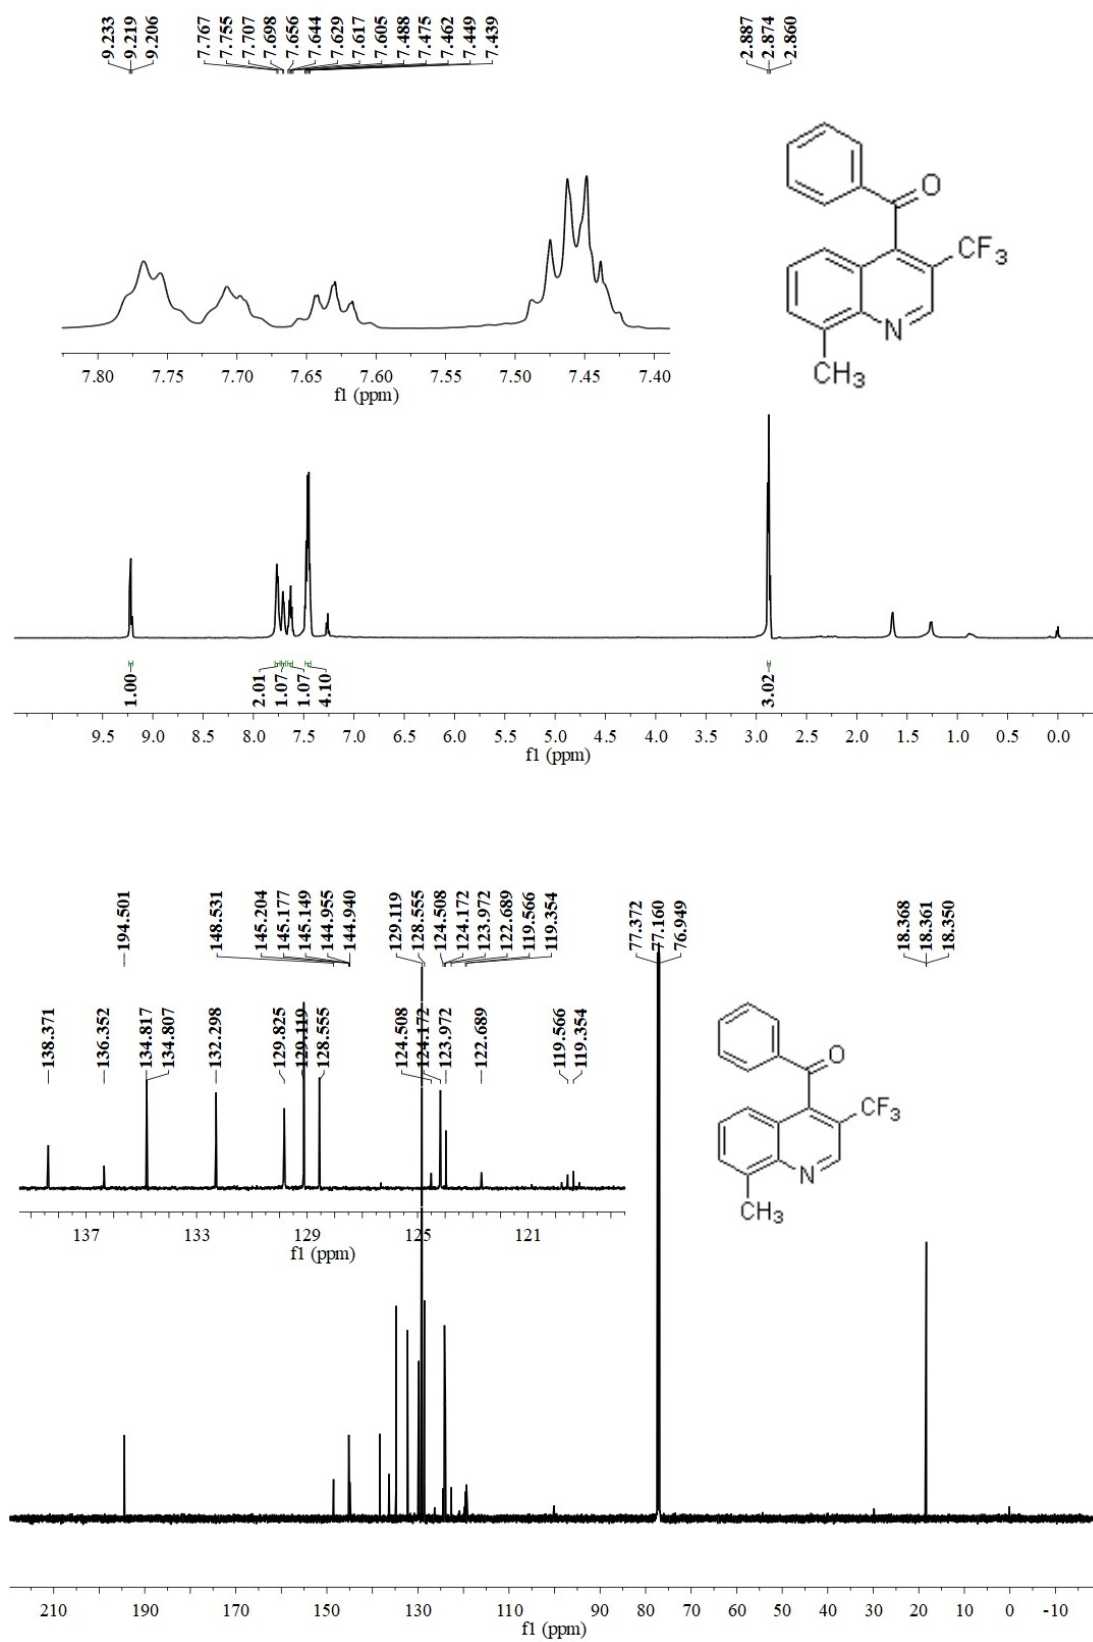

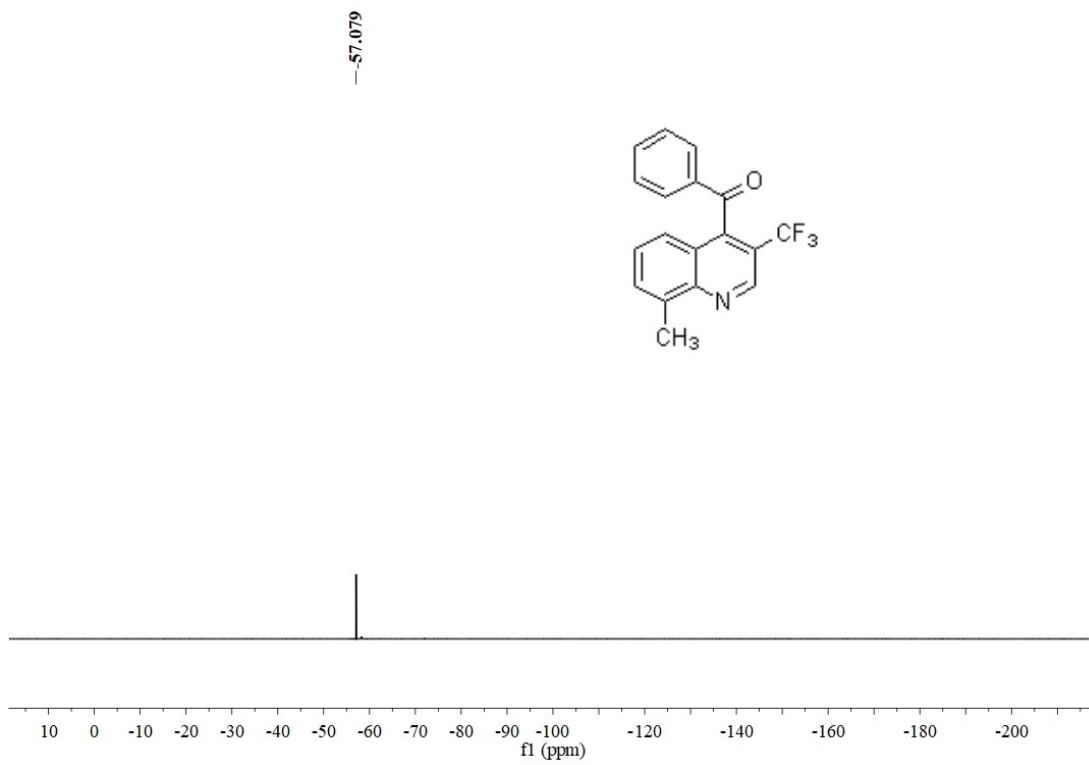

**3ca + 3c'a**

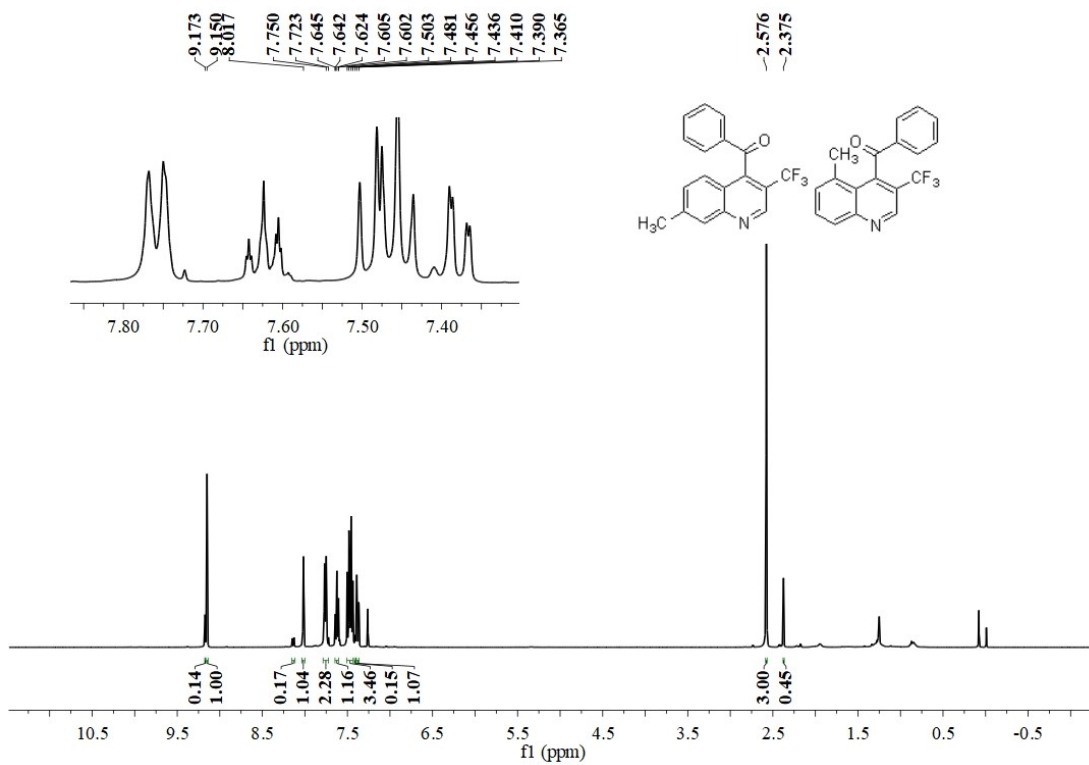

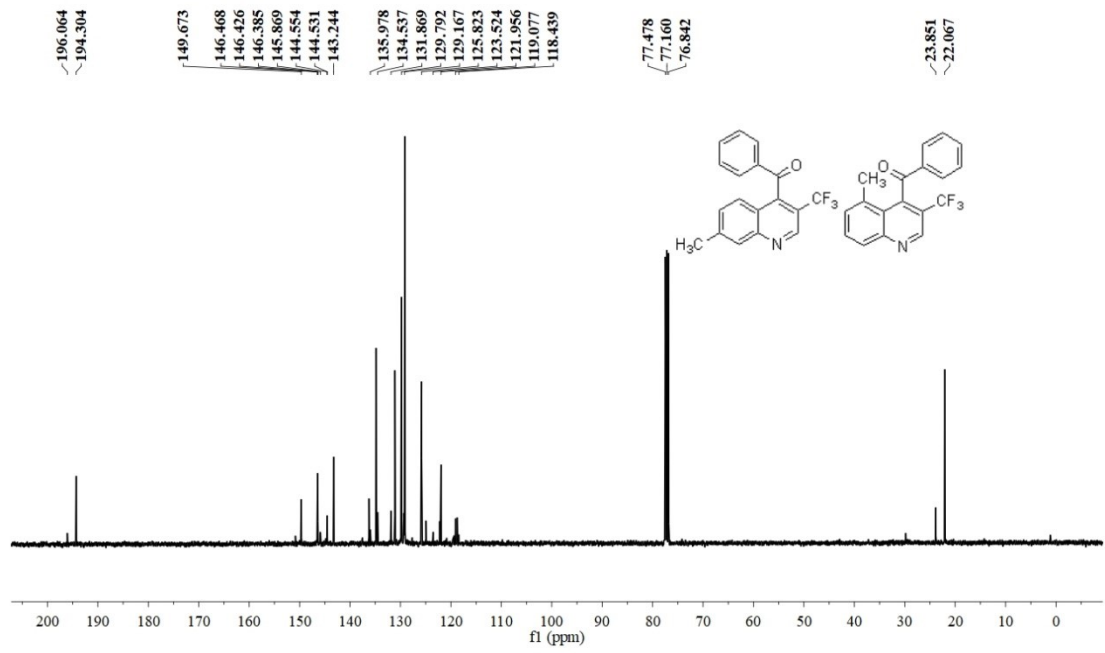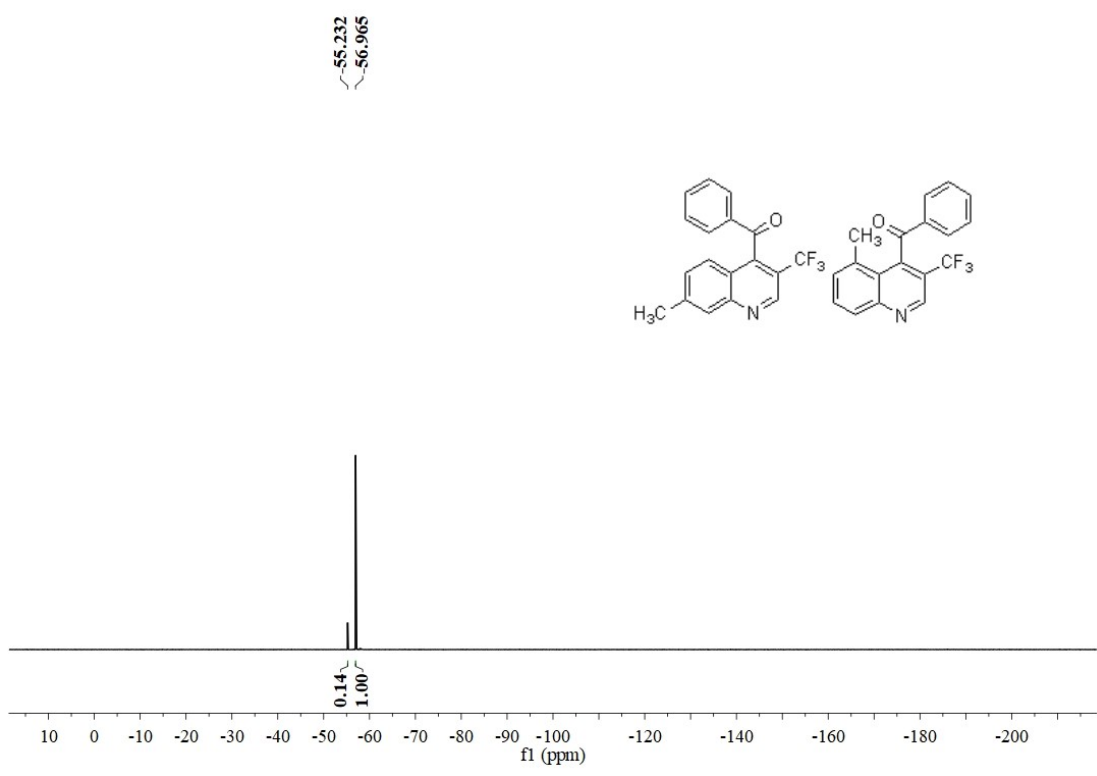

3da

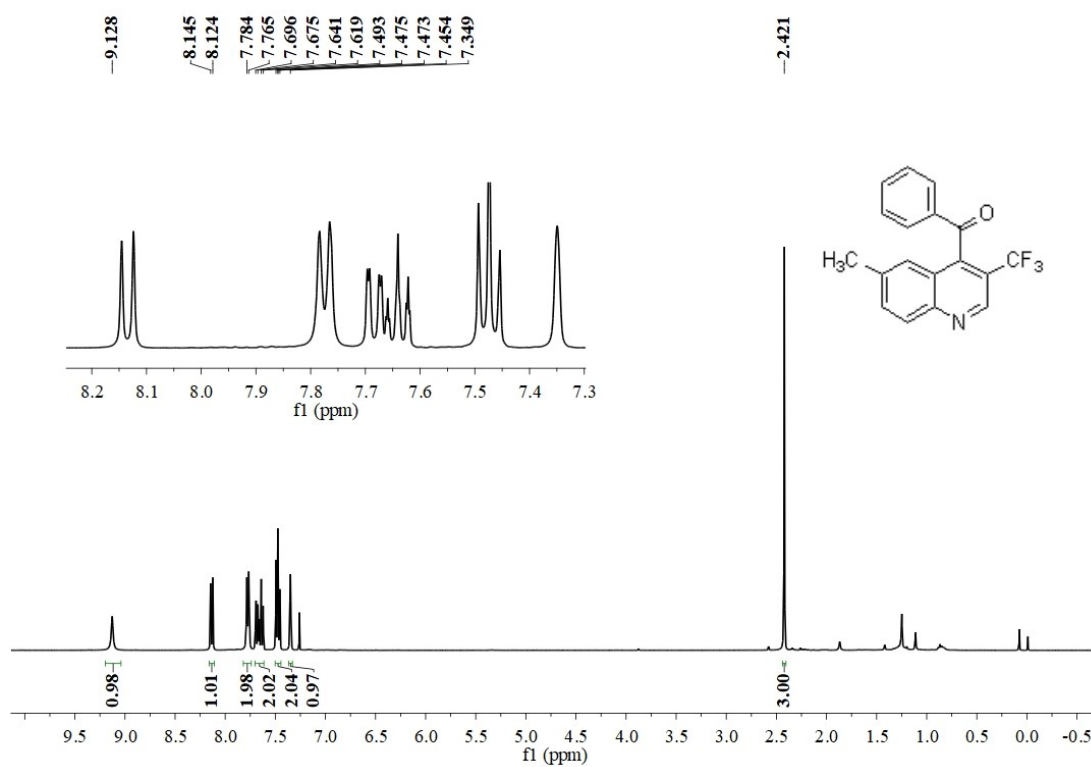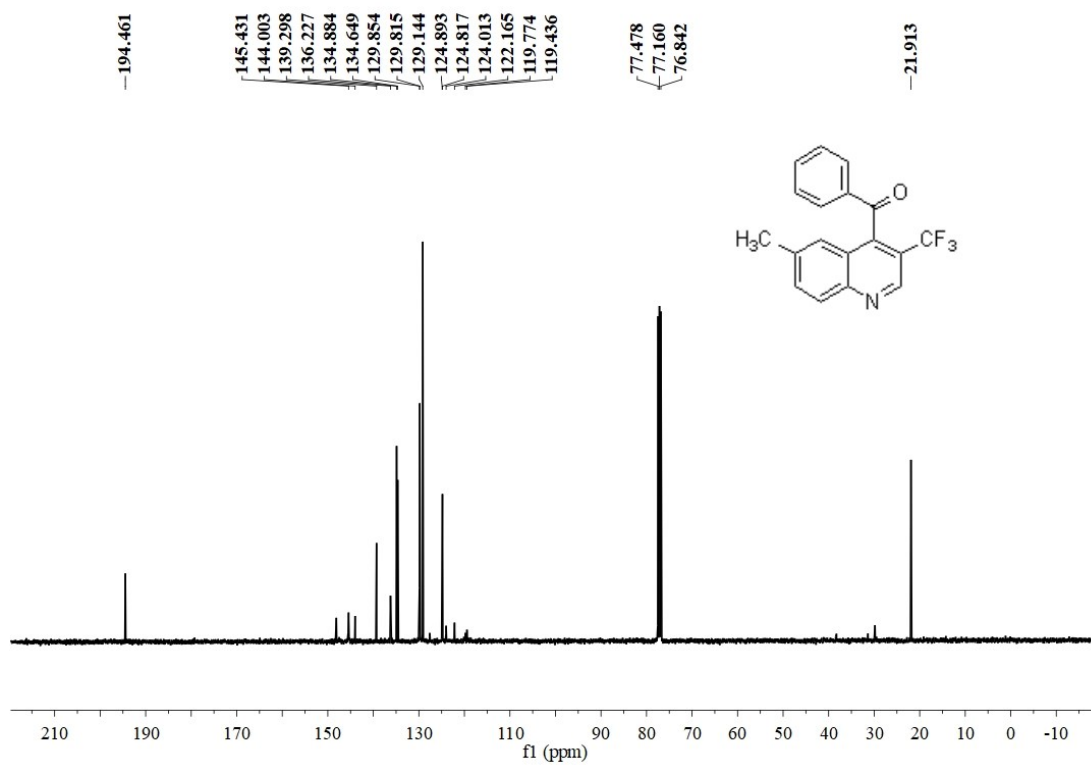

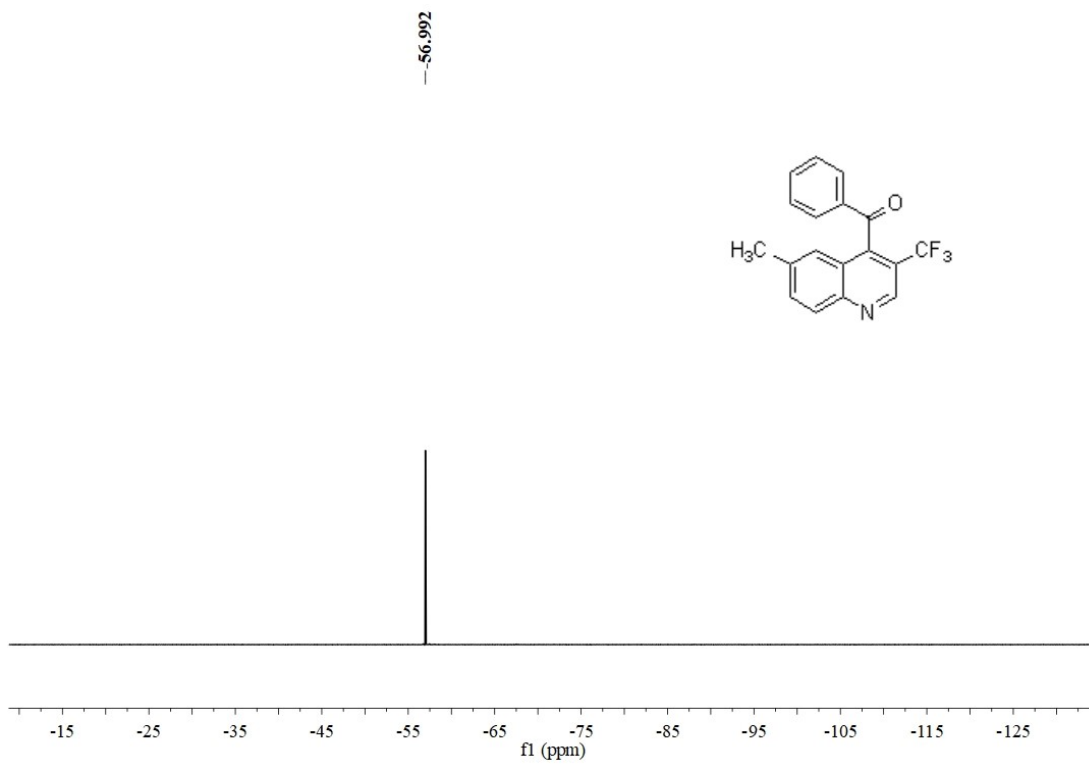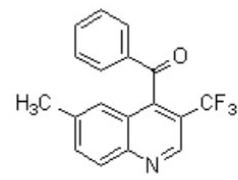

**3ea**

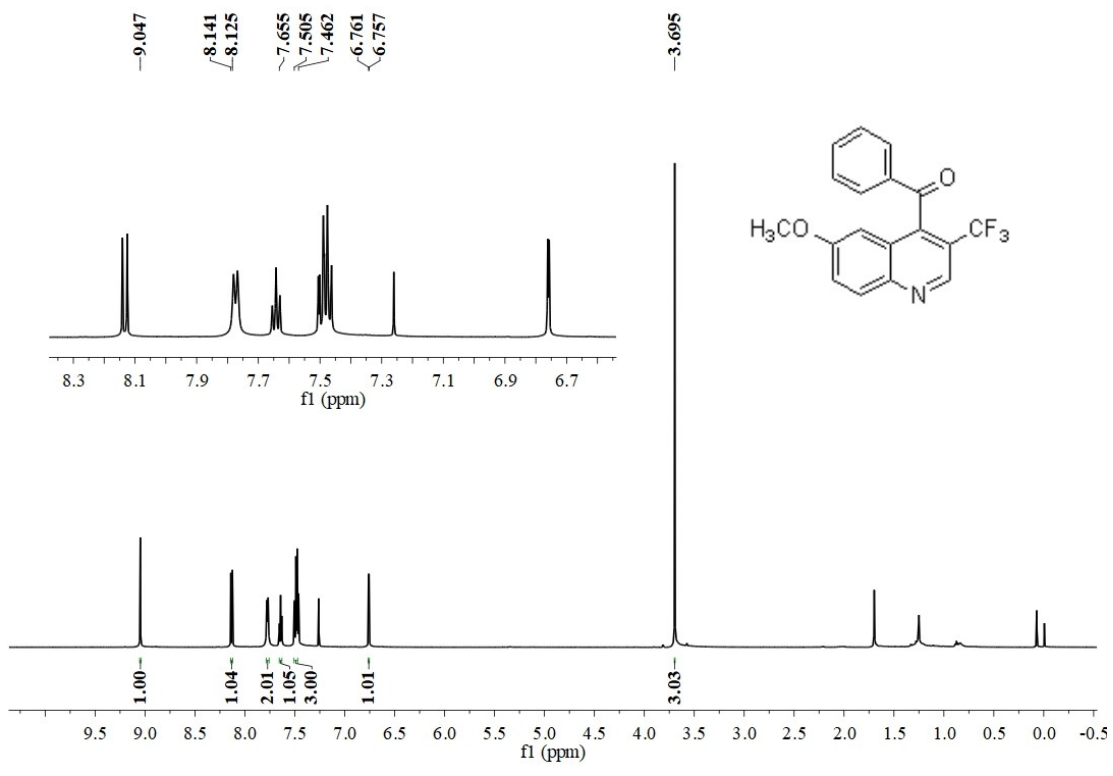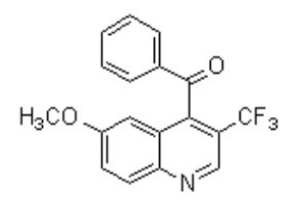

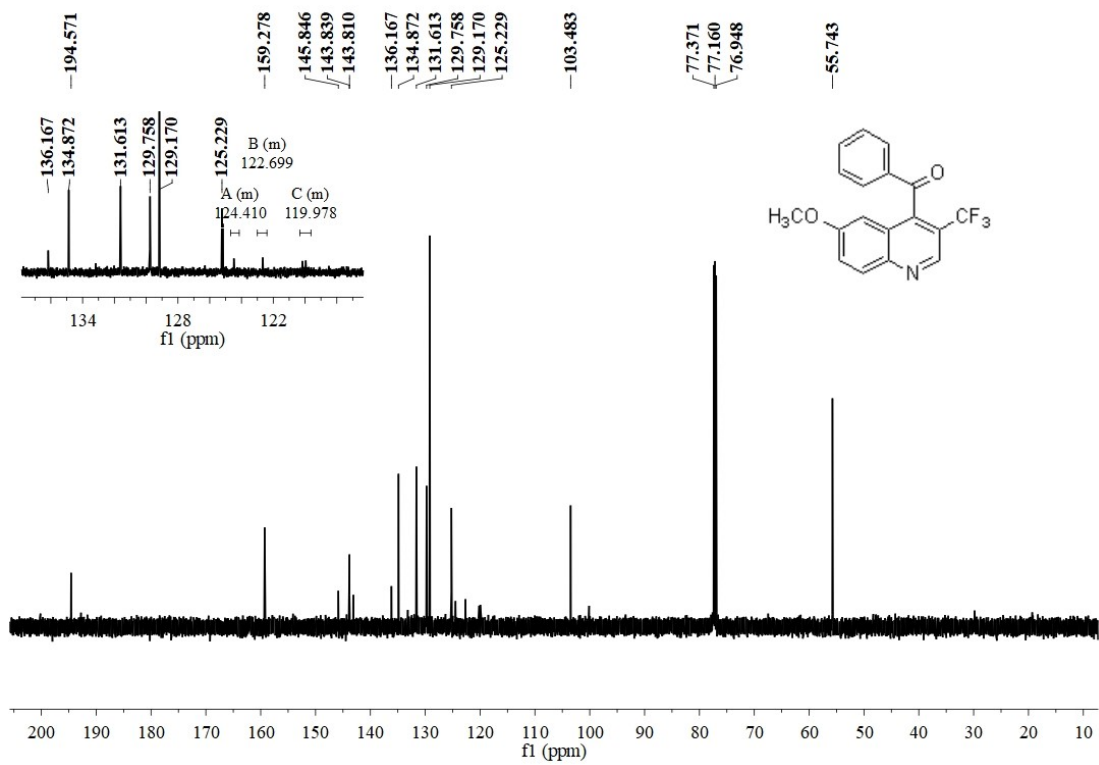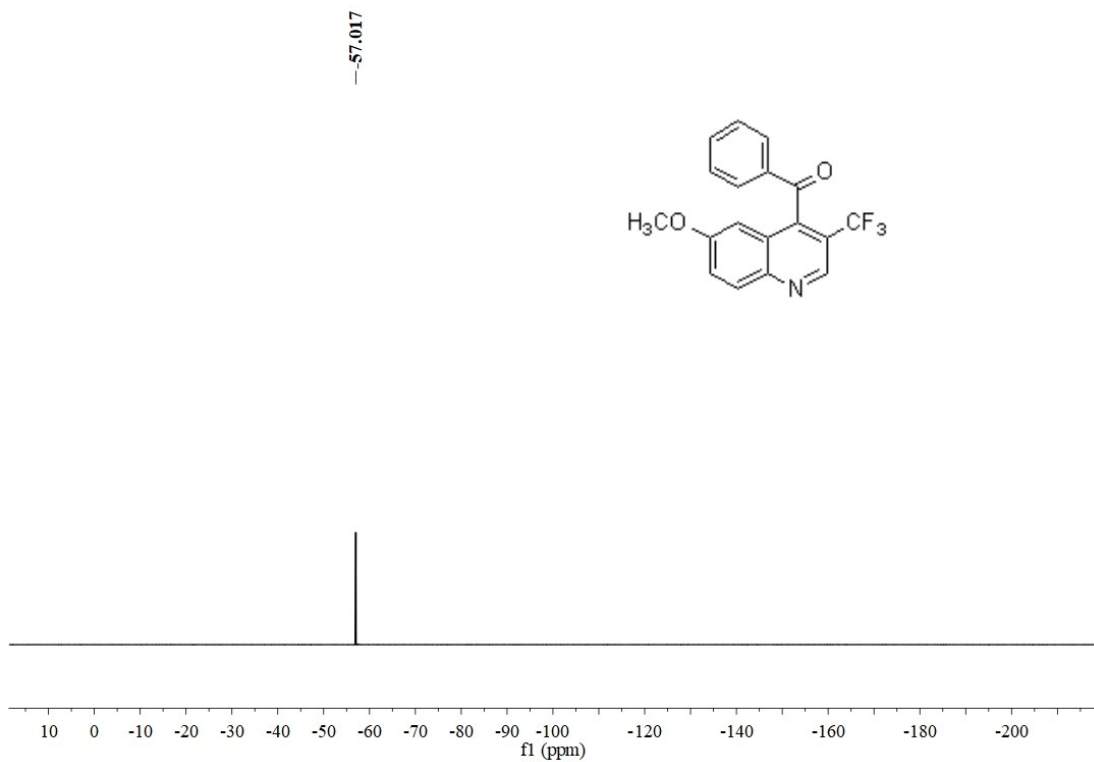



3ga

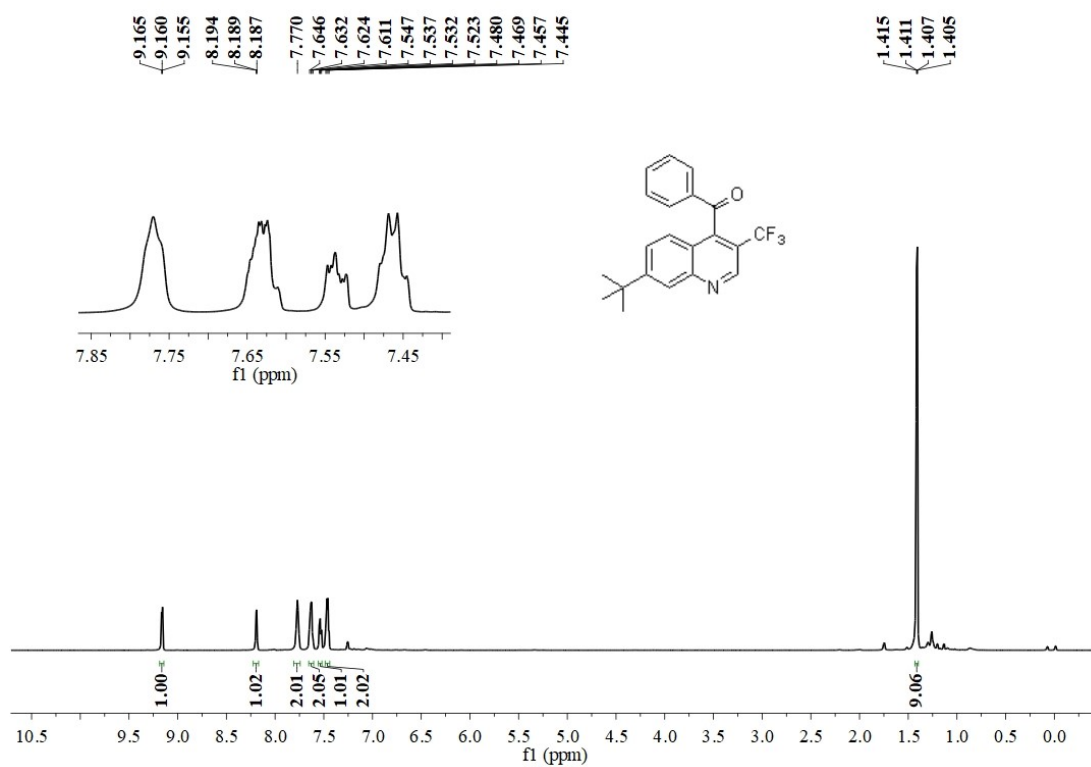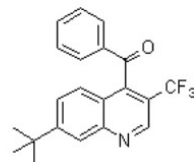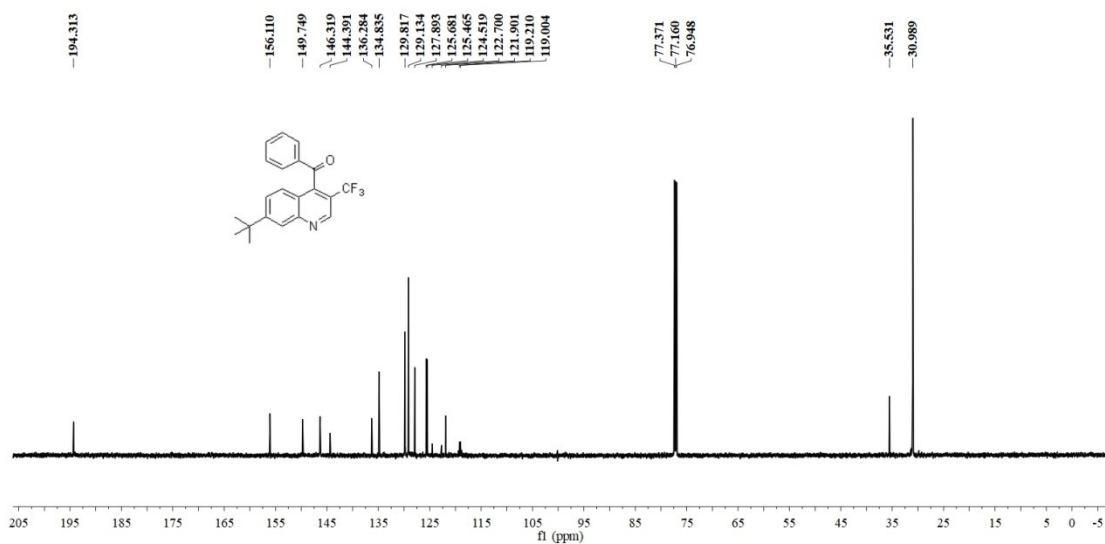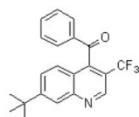

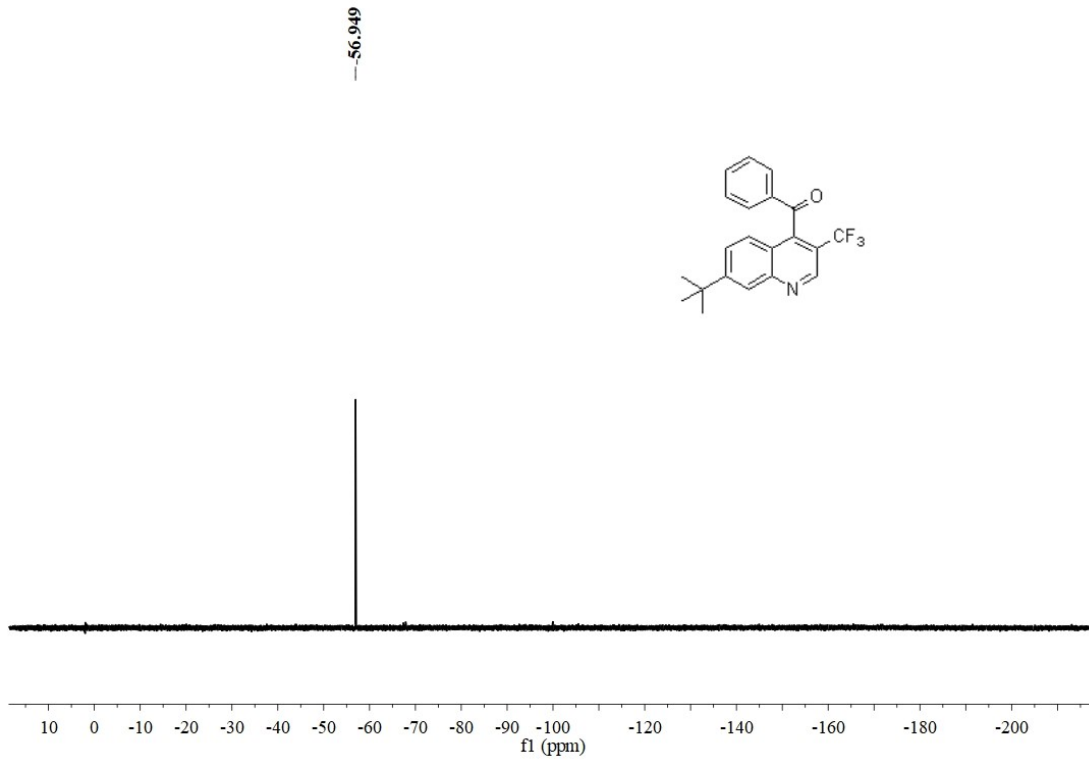

3ha

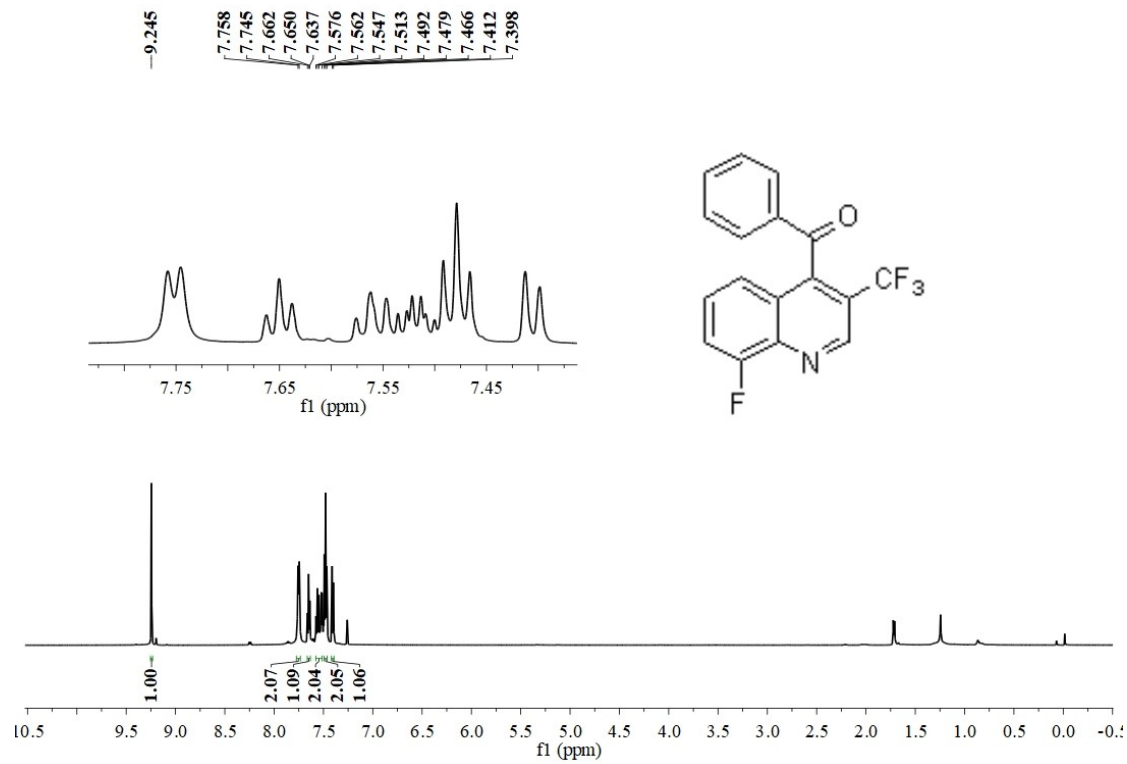

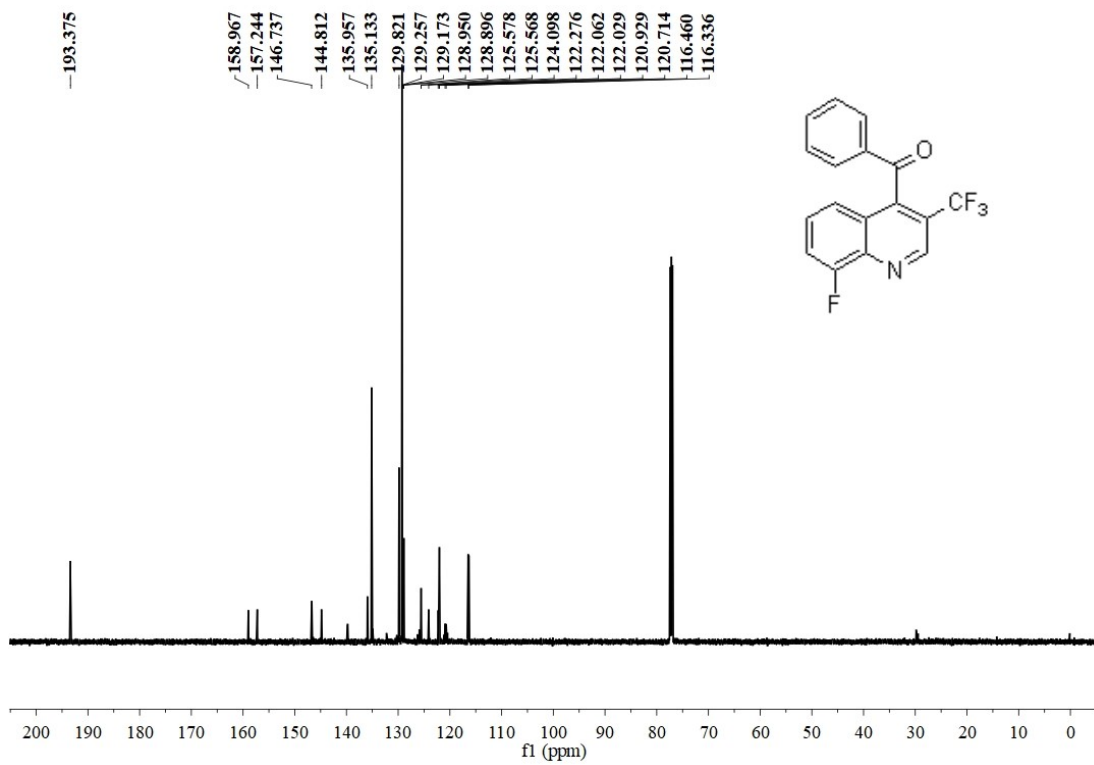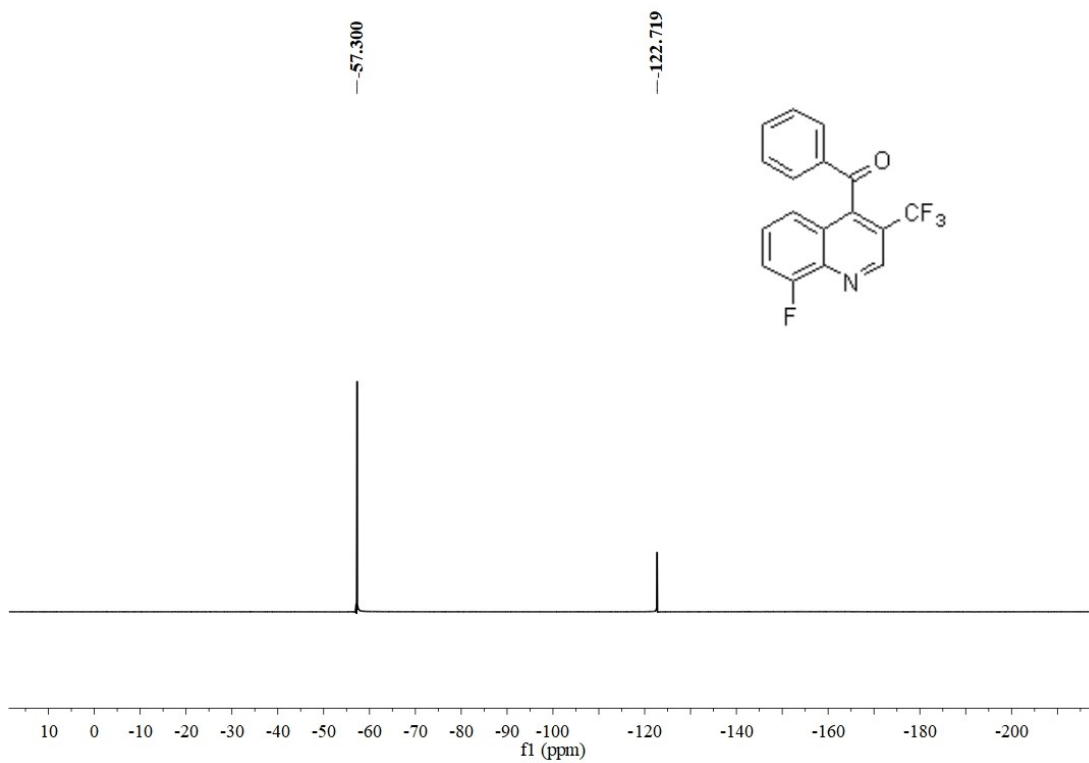

3ia

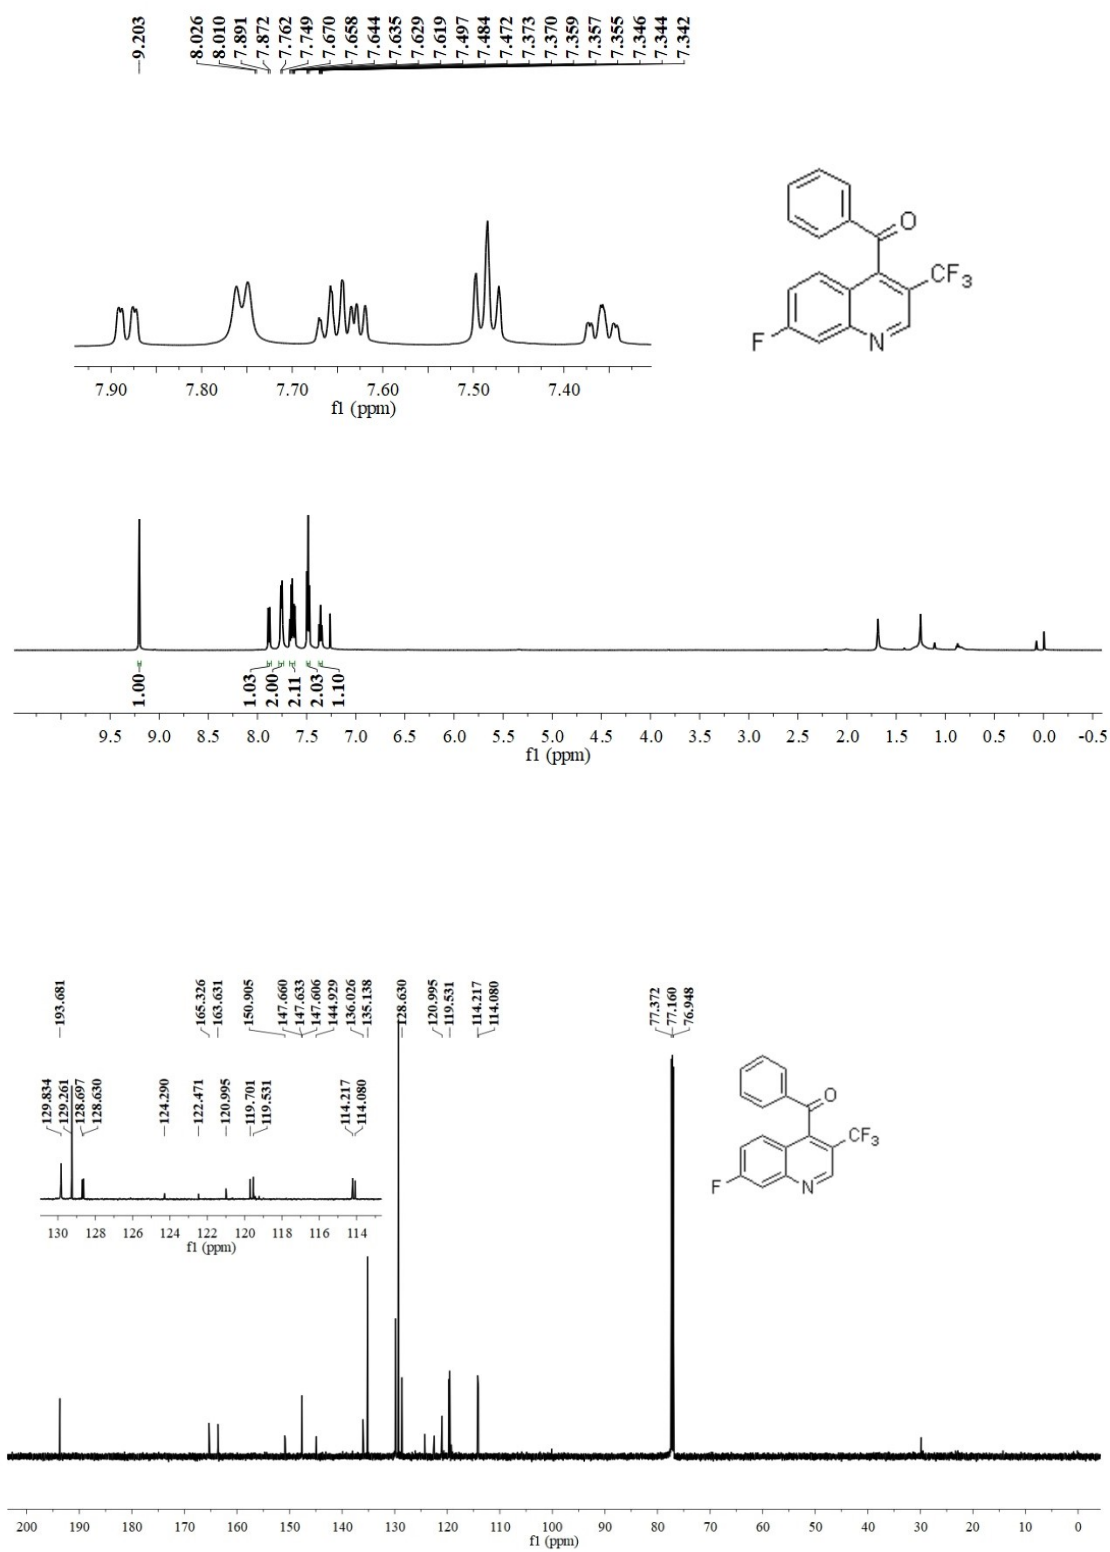

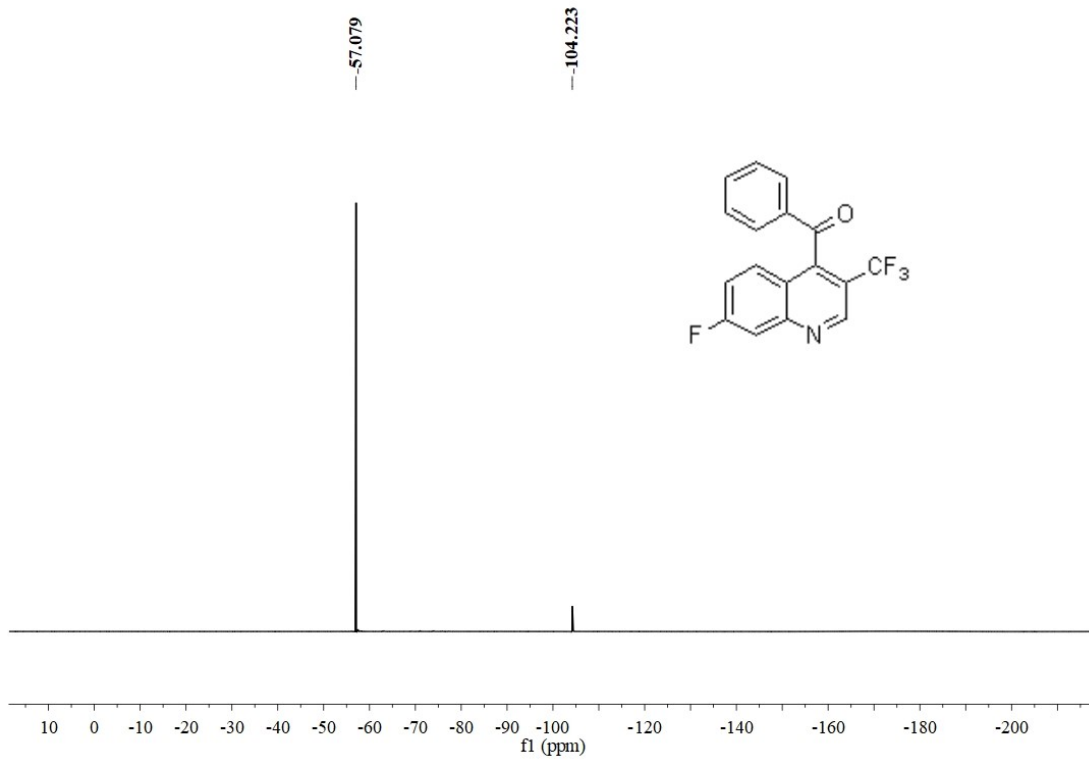

### 3ja

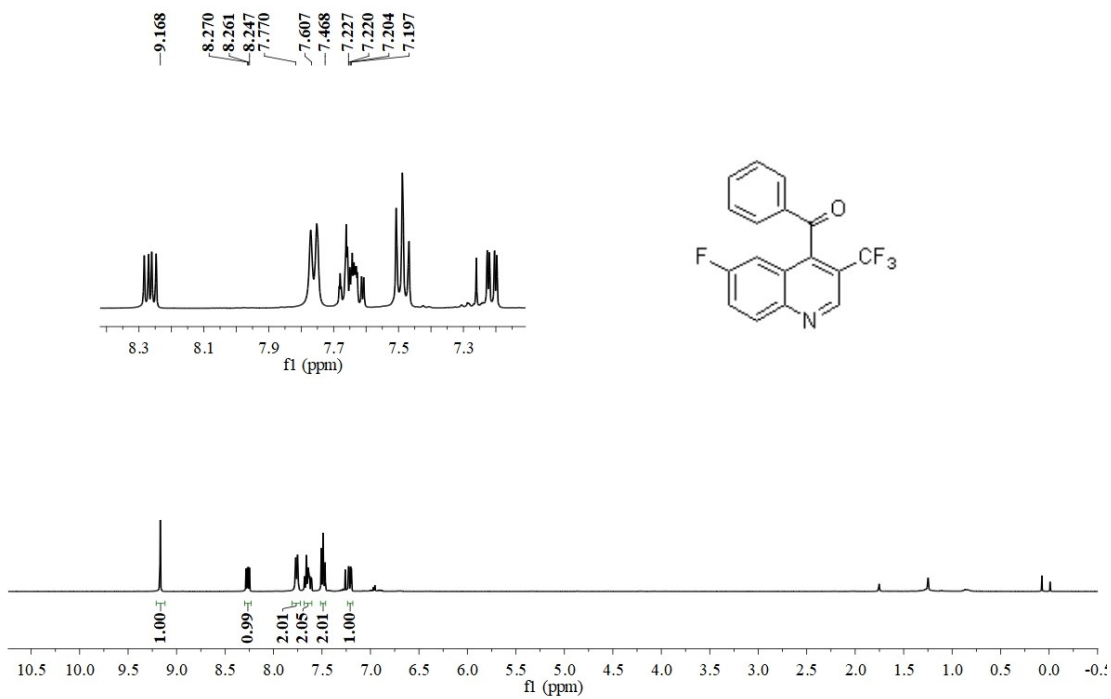

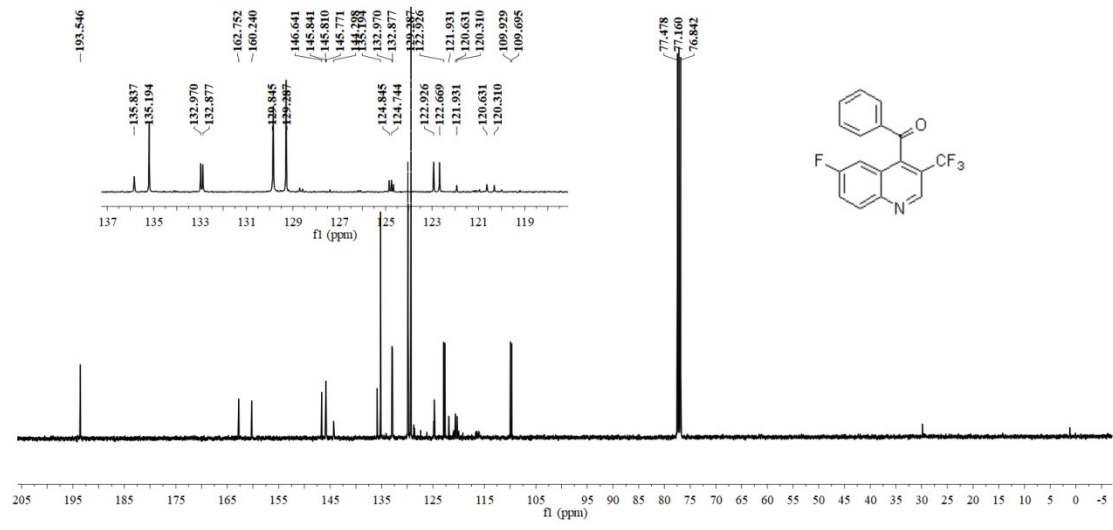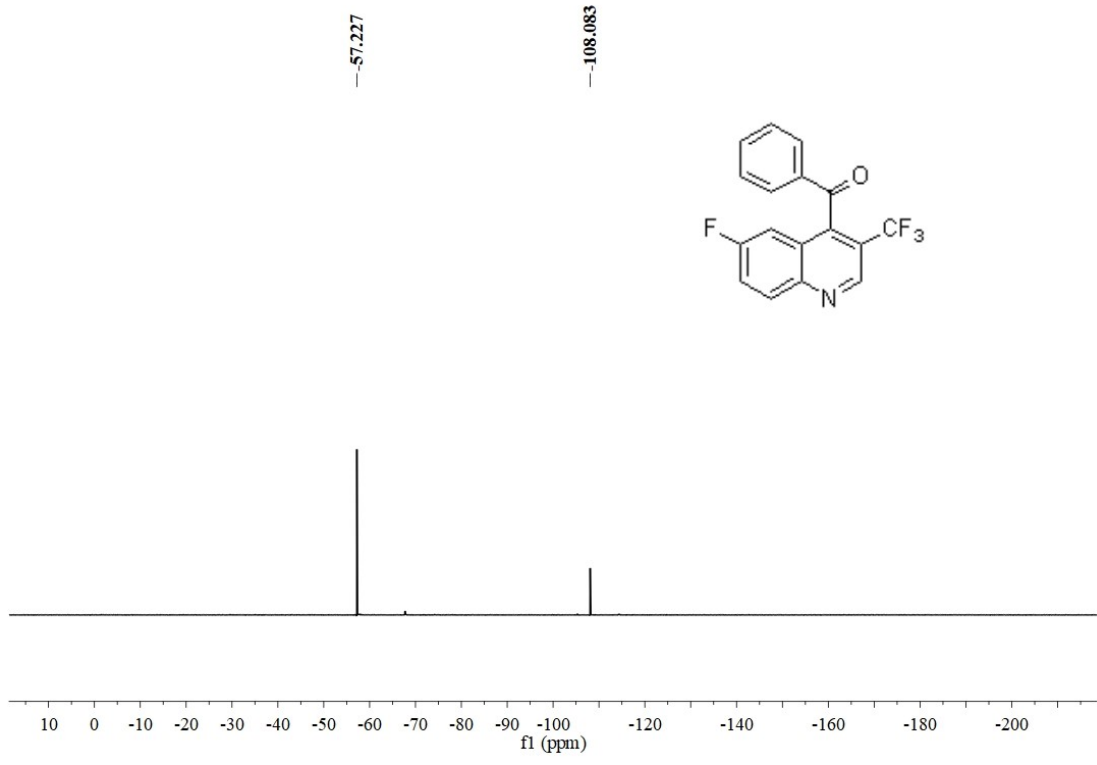

3ka

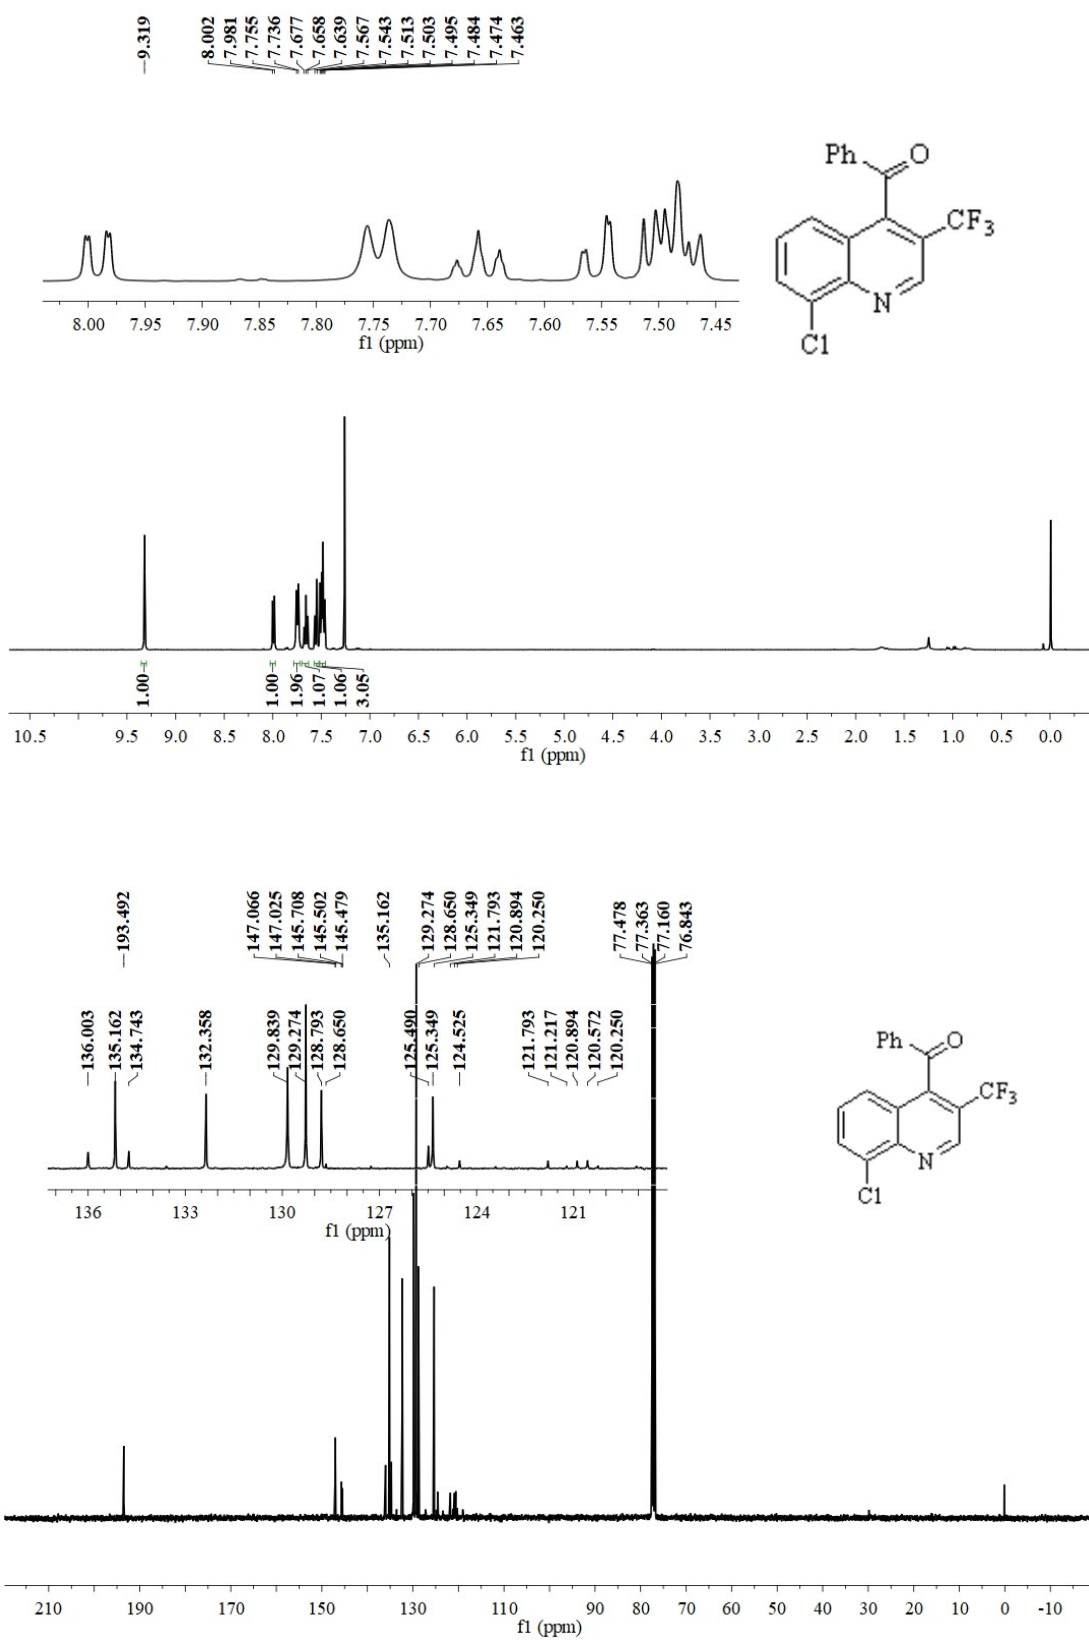

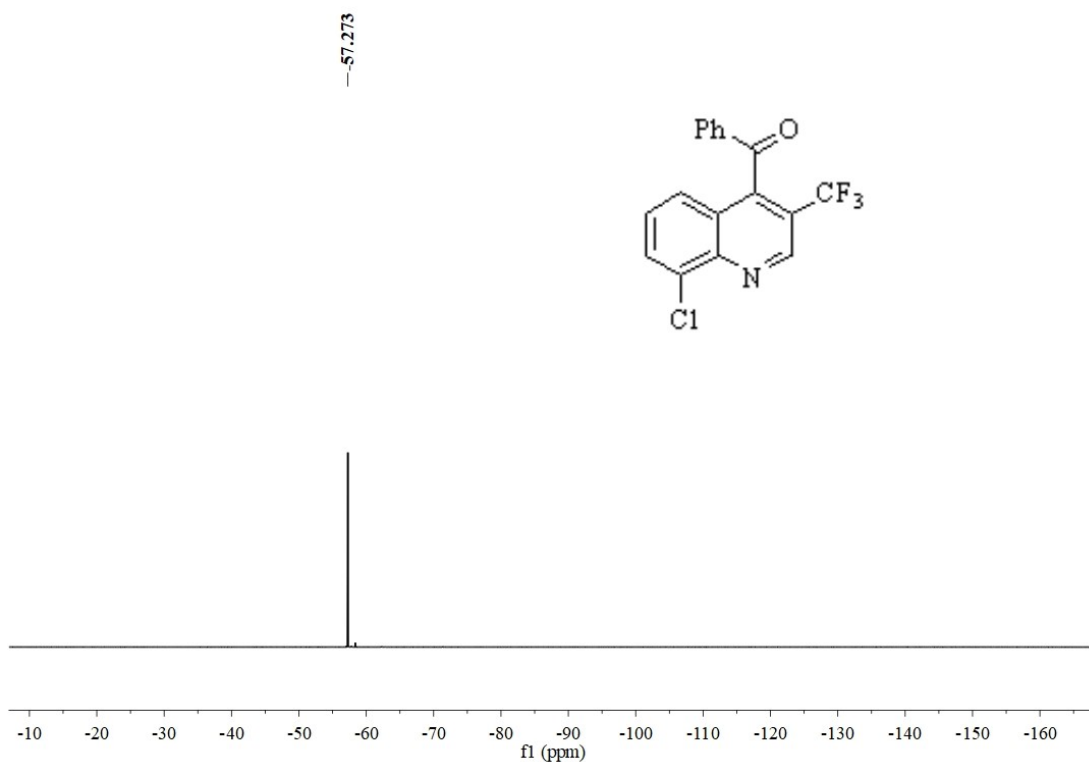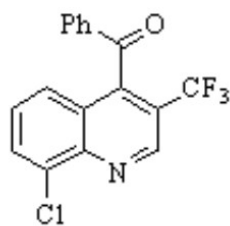

**3la**

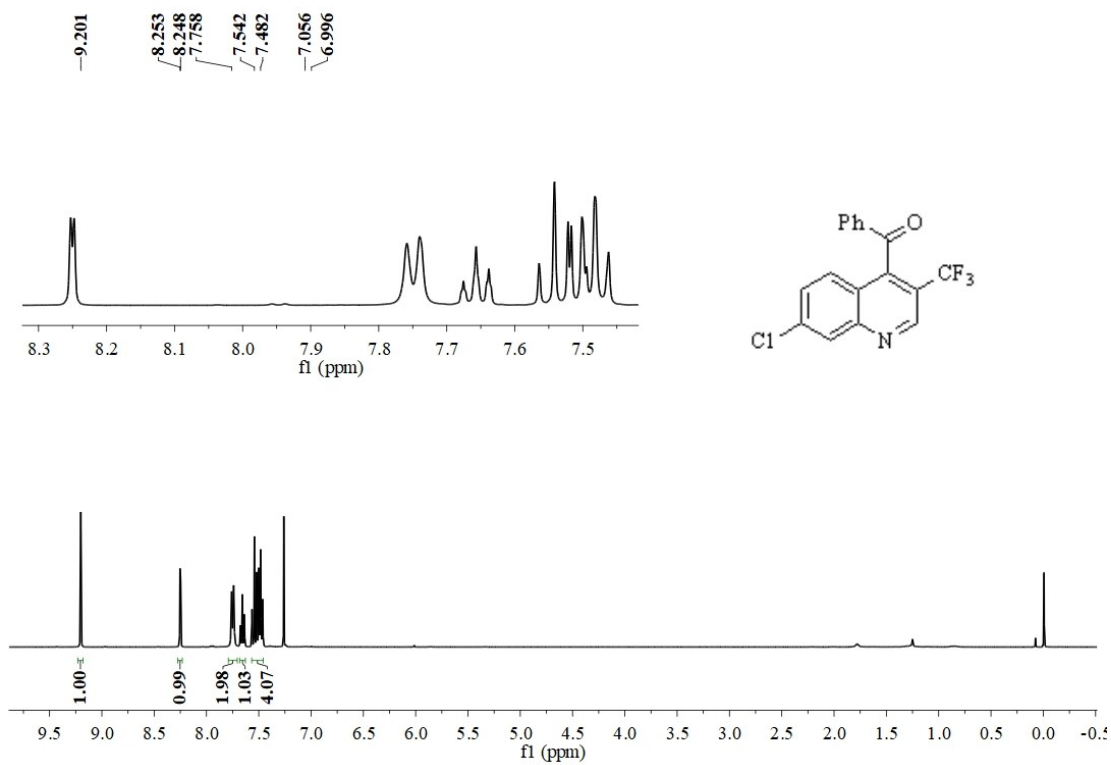



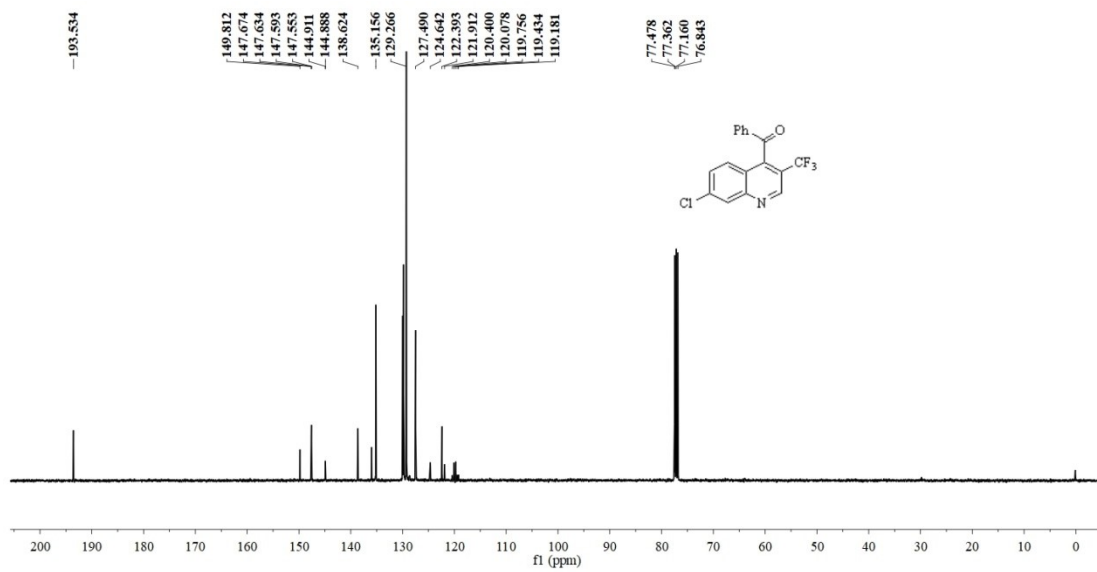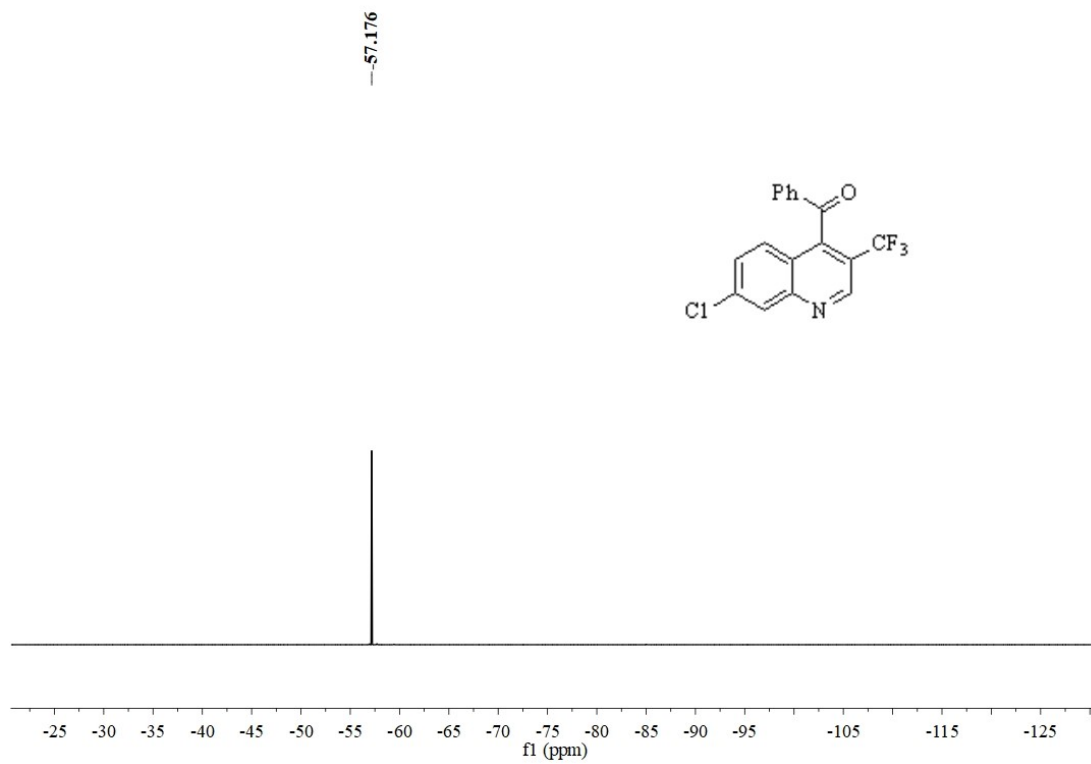

### 3ma

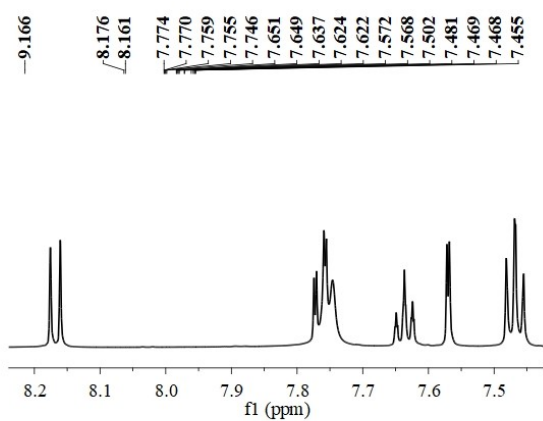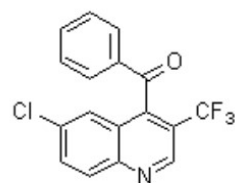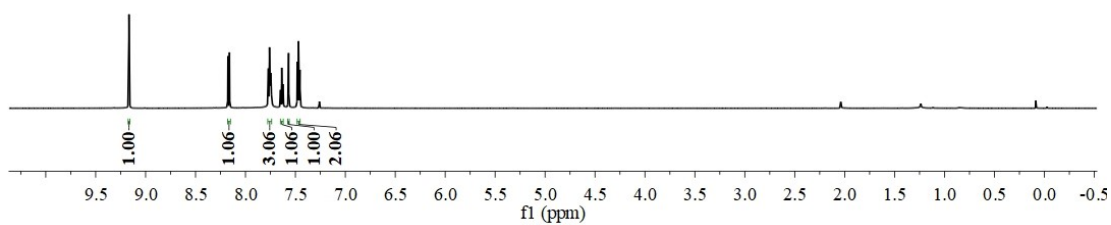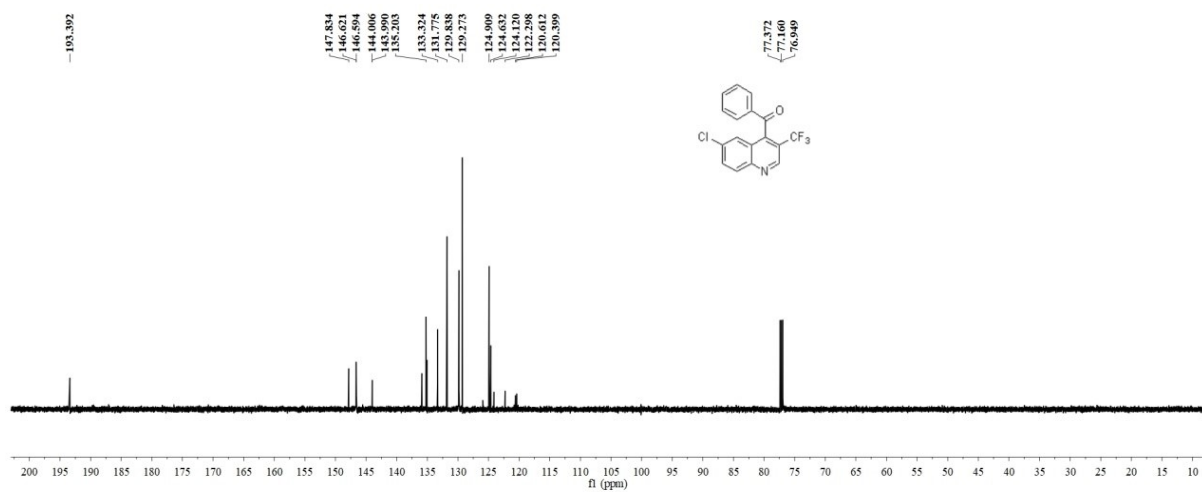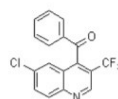

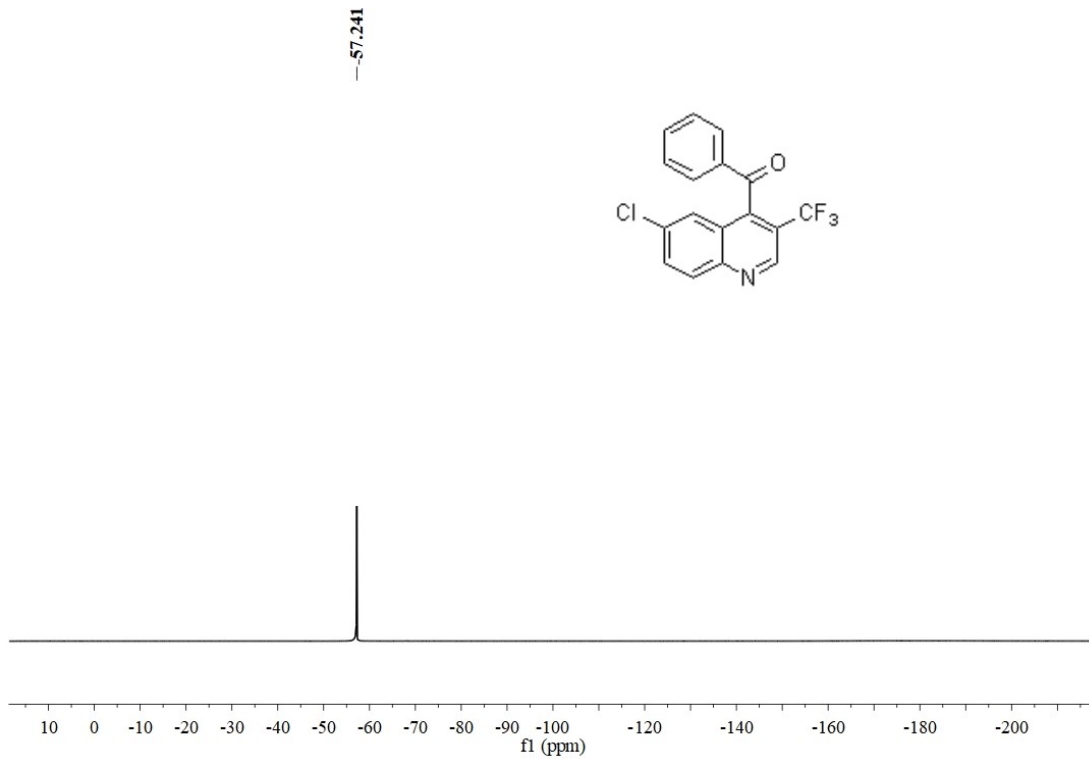

### 3pa

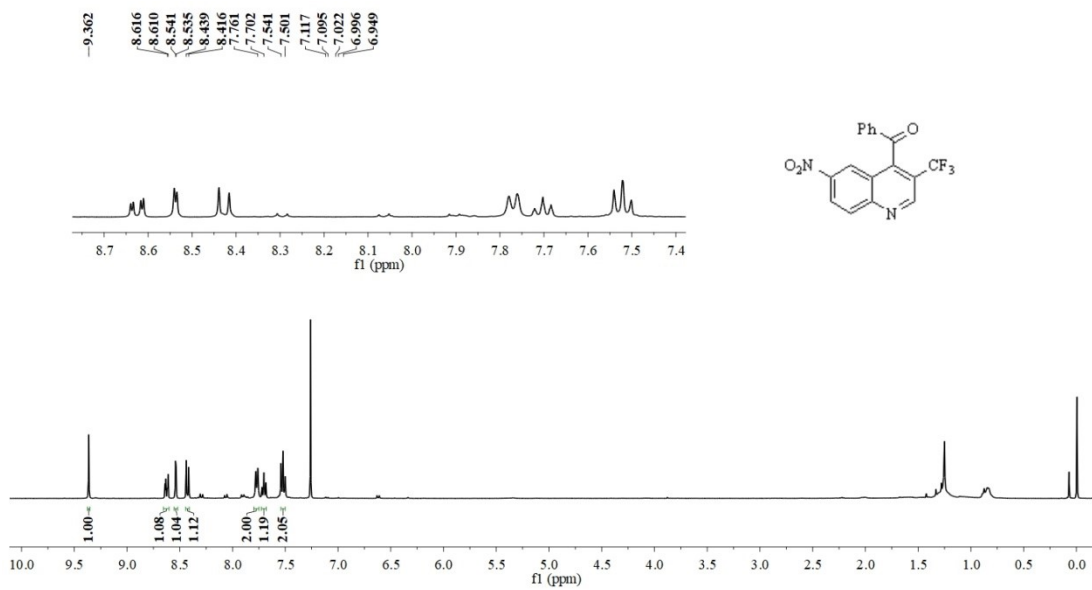

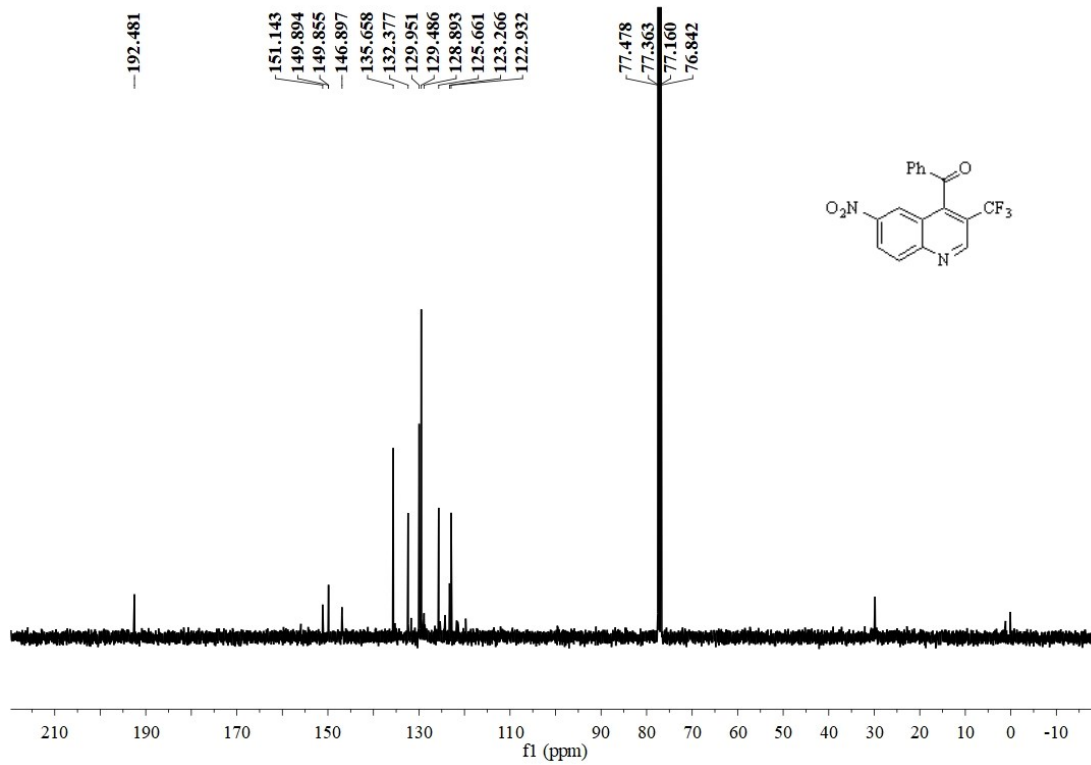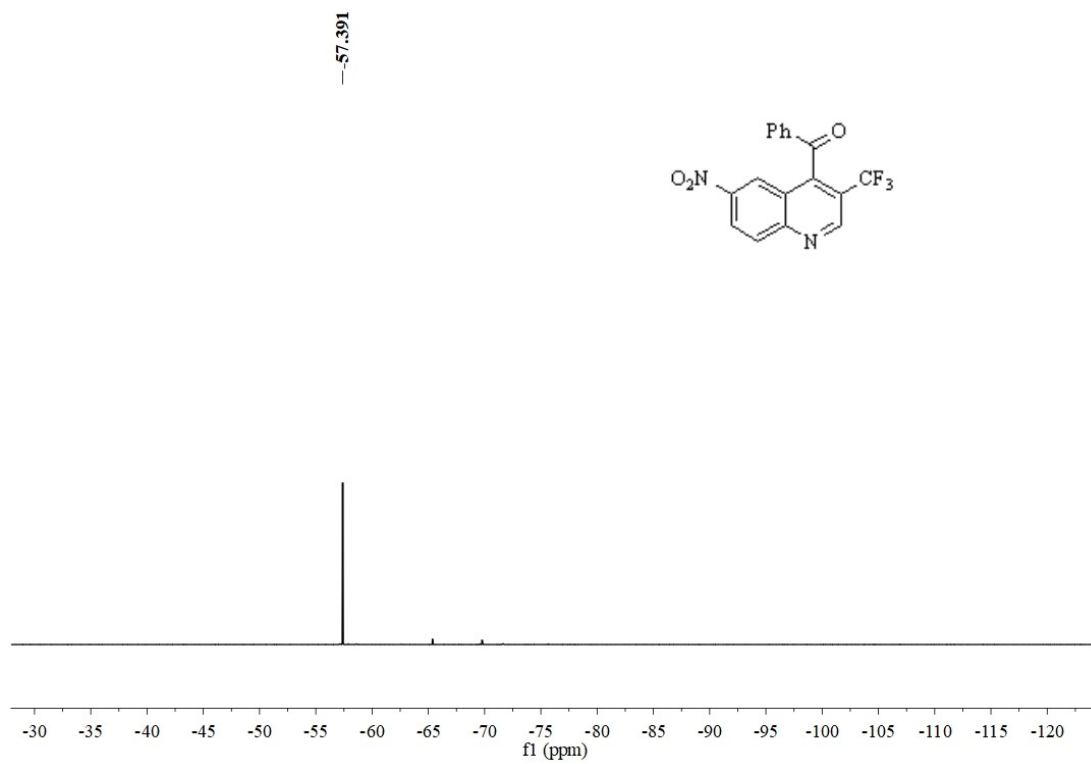

### 3qa

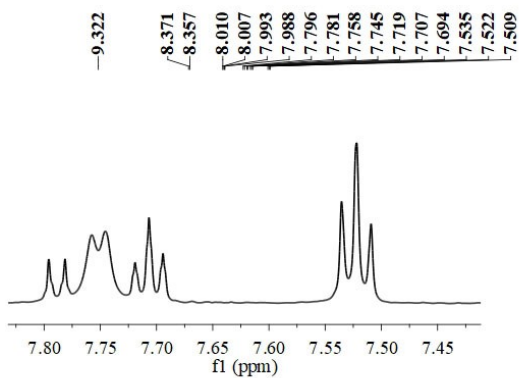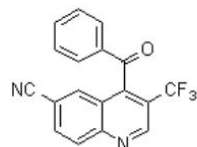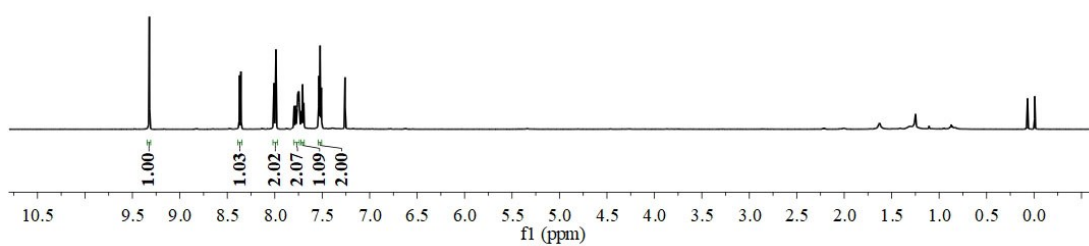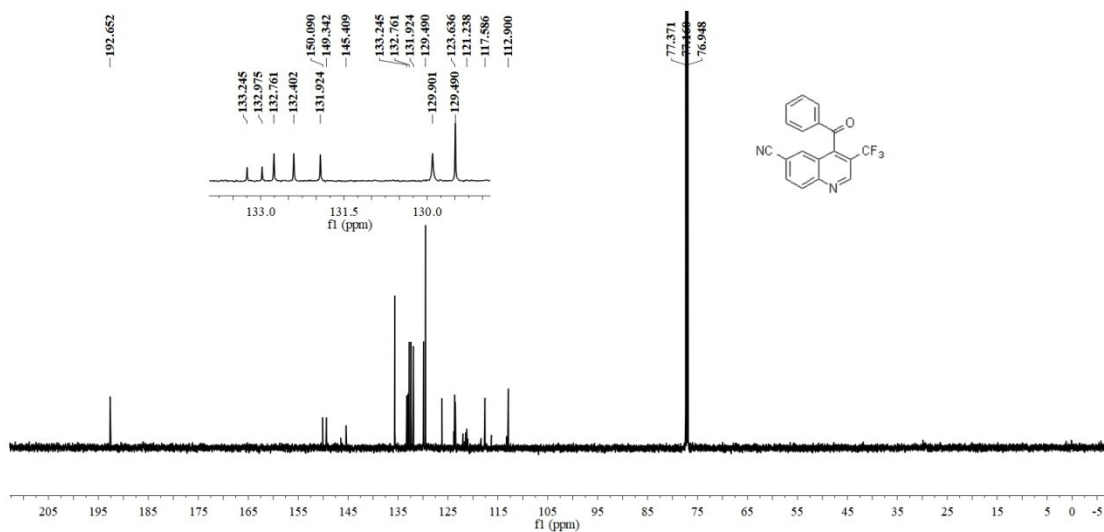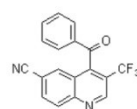

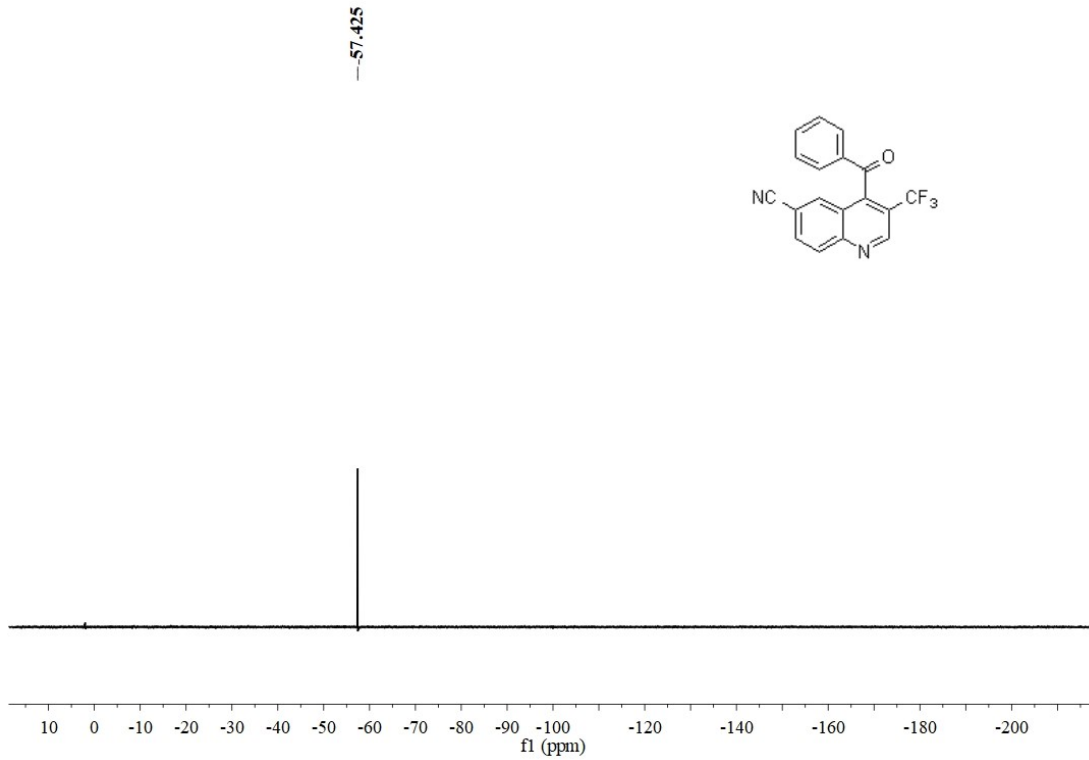

**3ra + 3r'a**

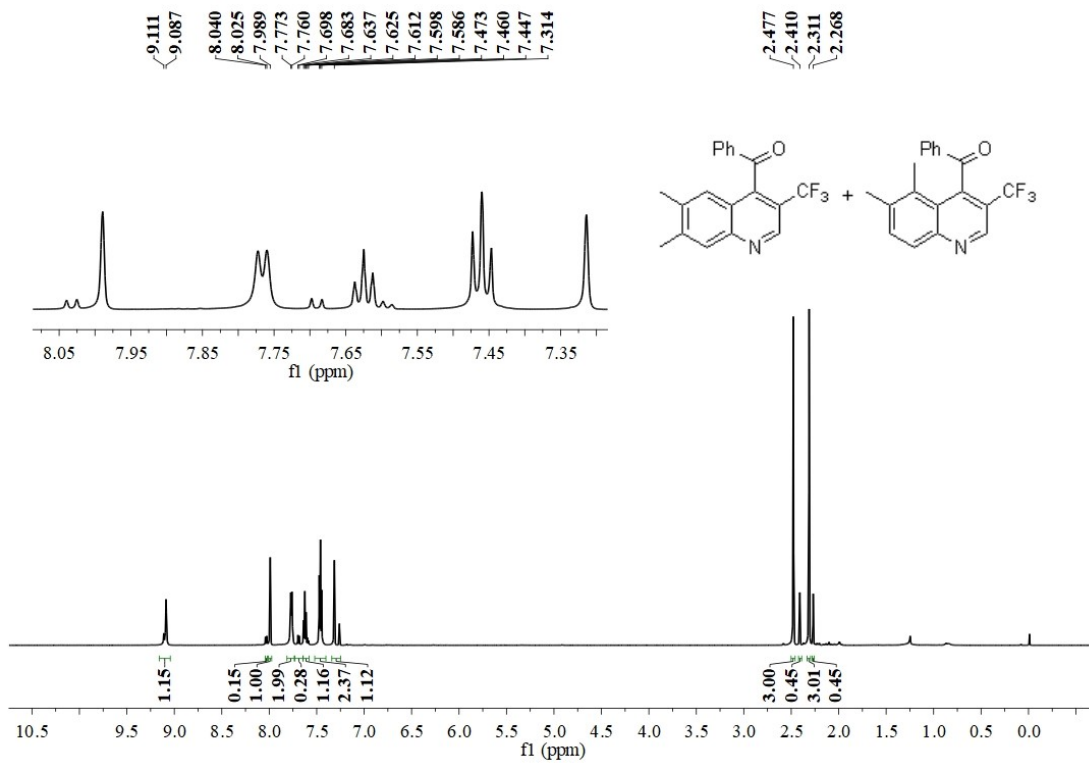

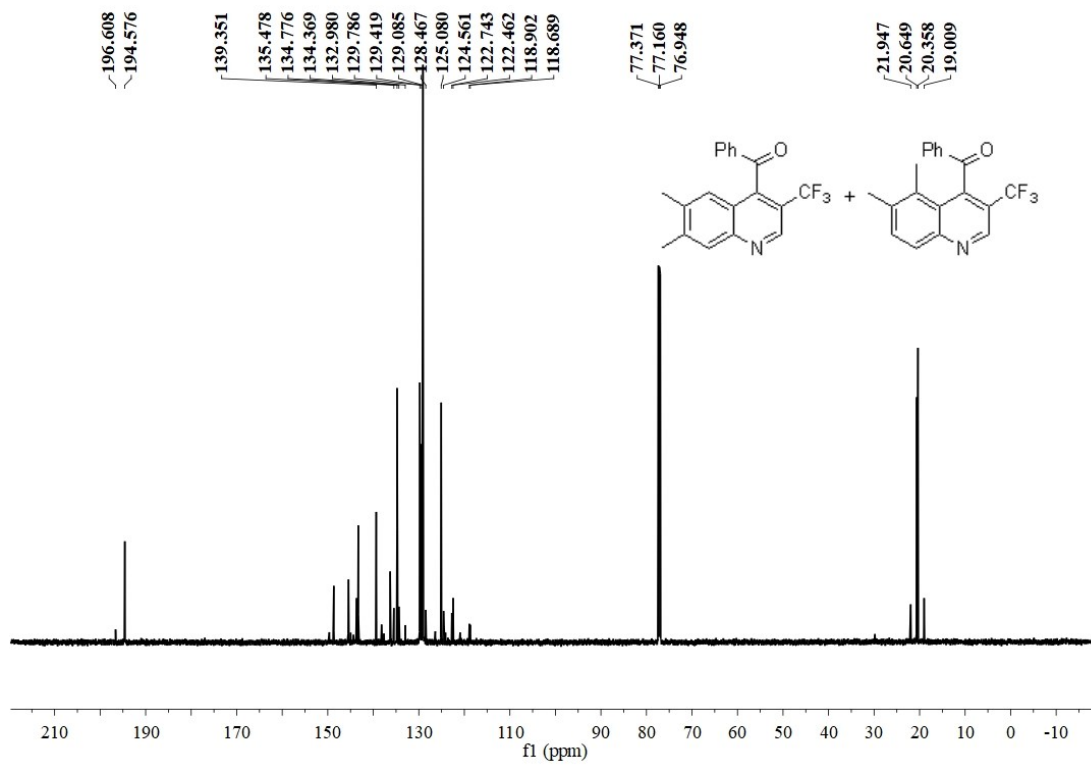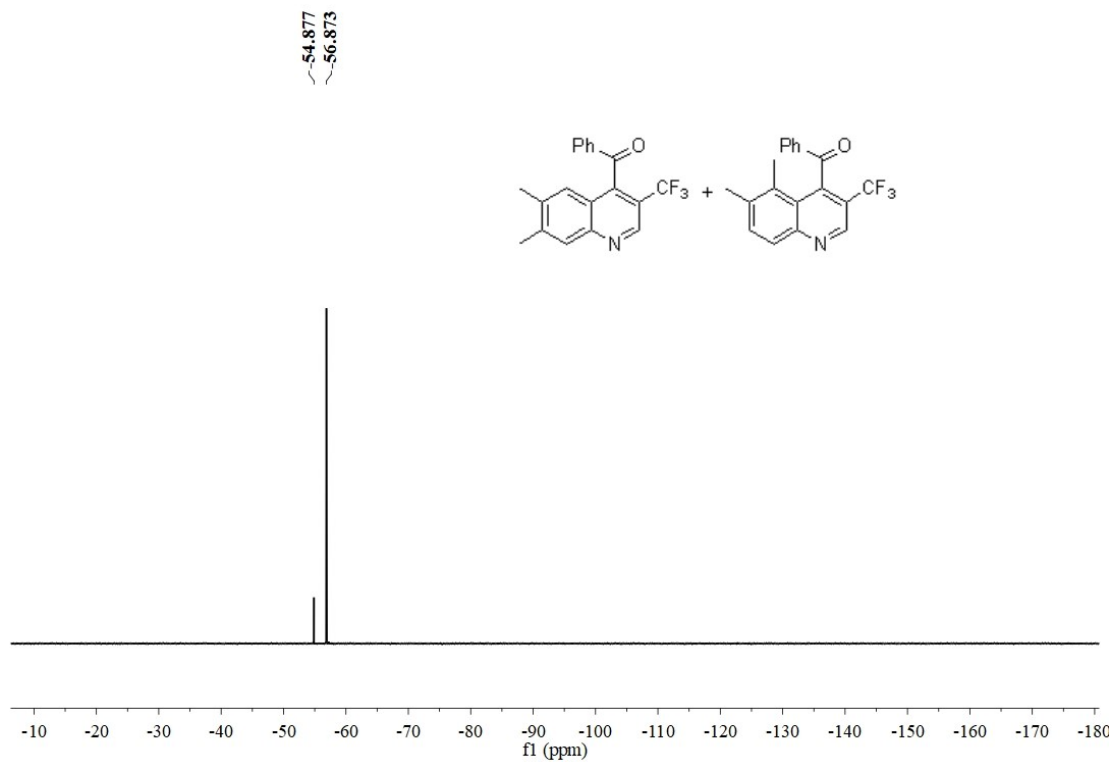

3sa

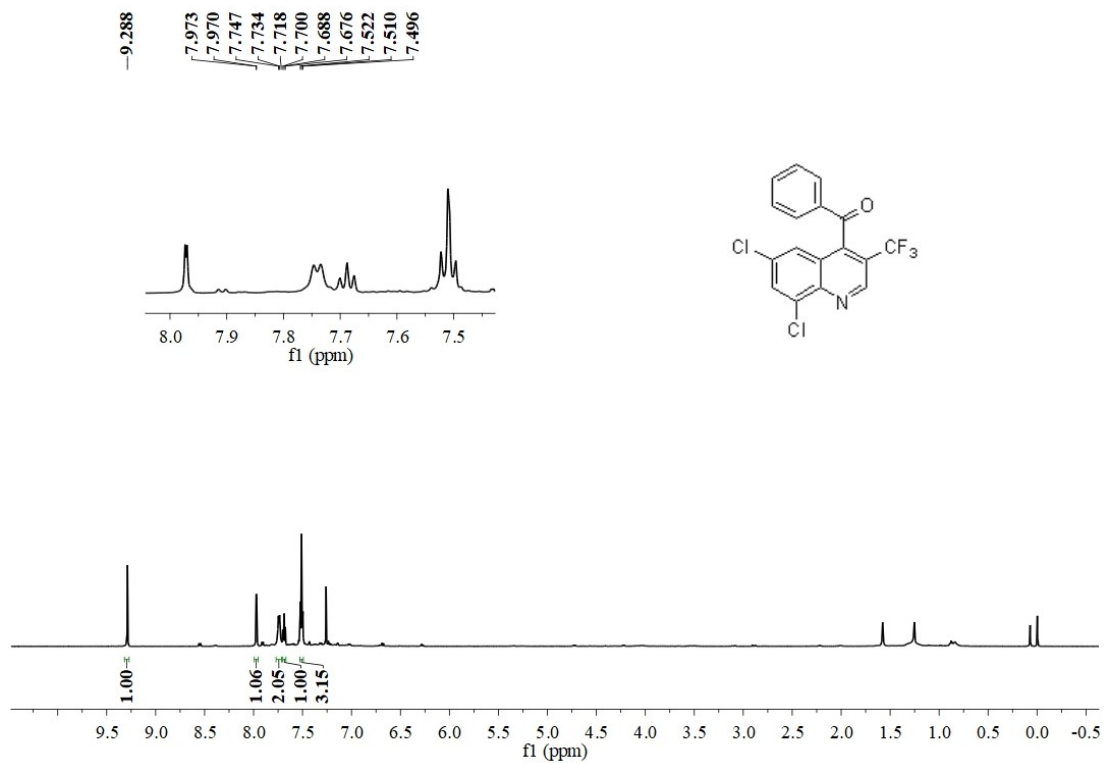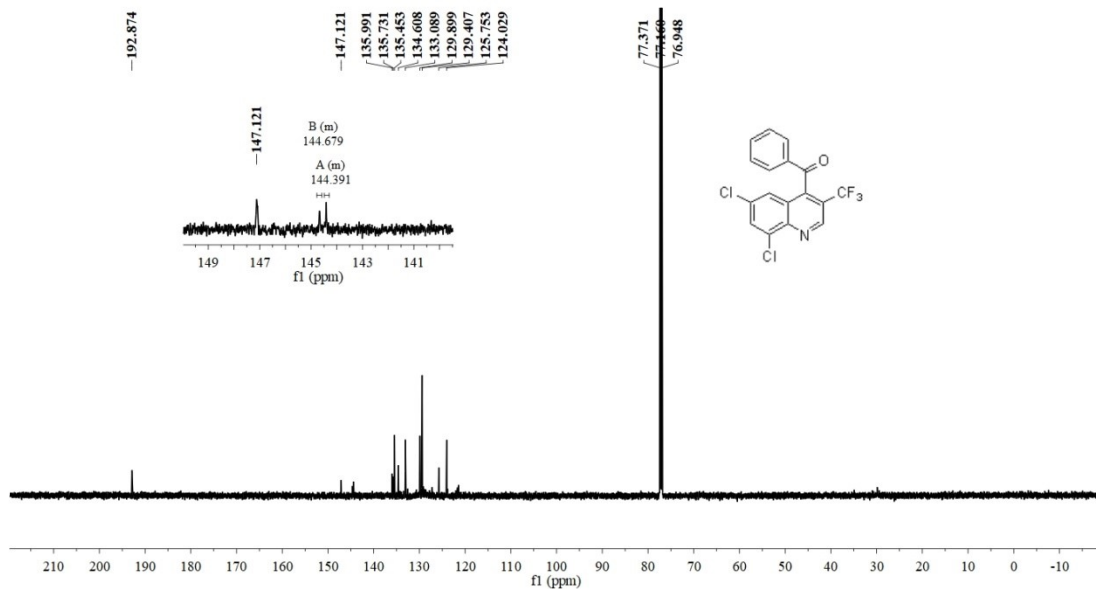



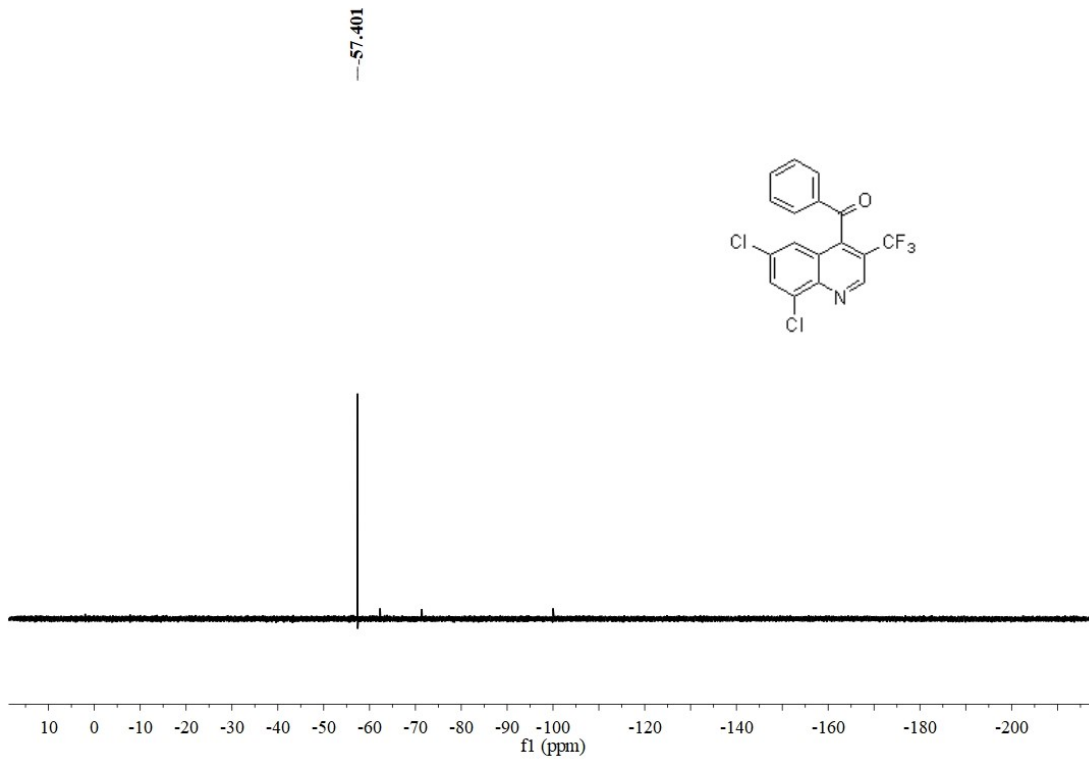

### 3ua

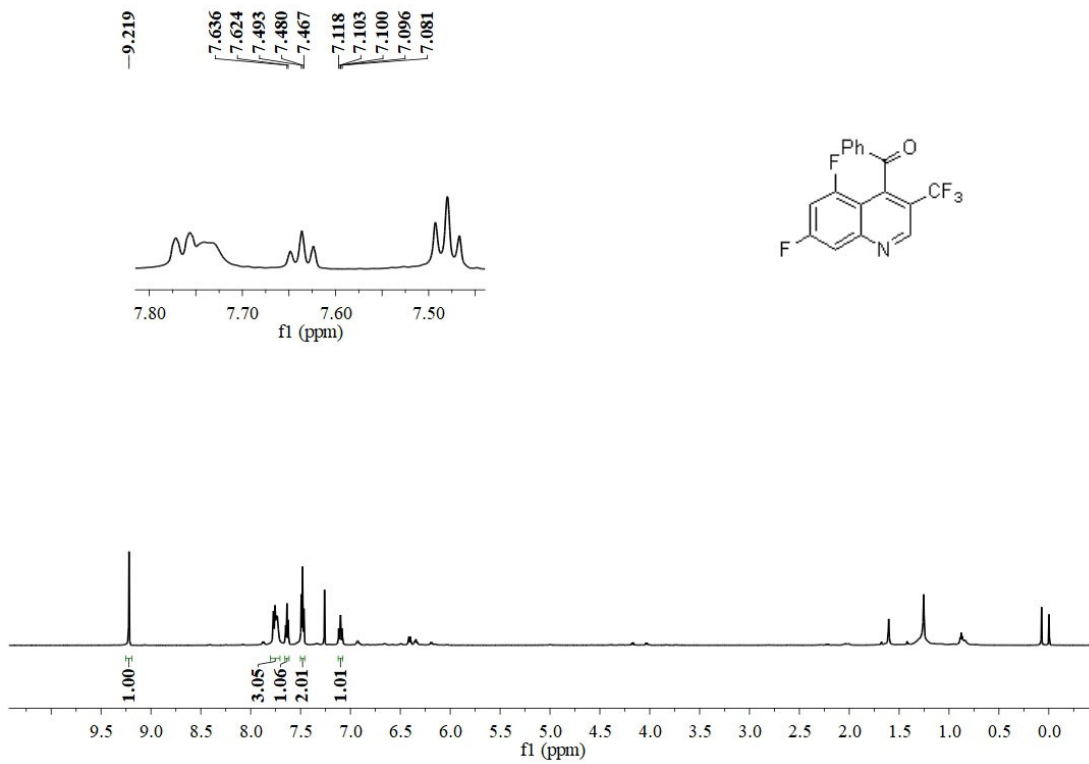

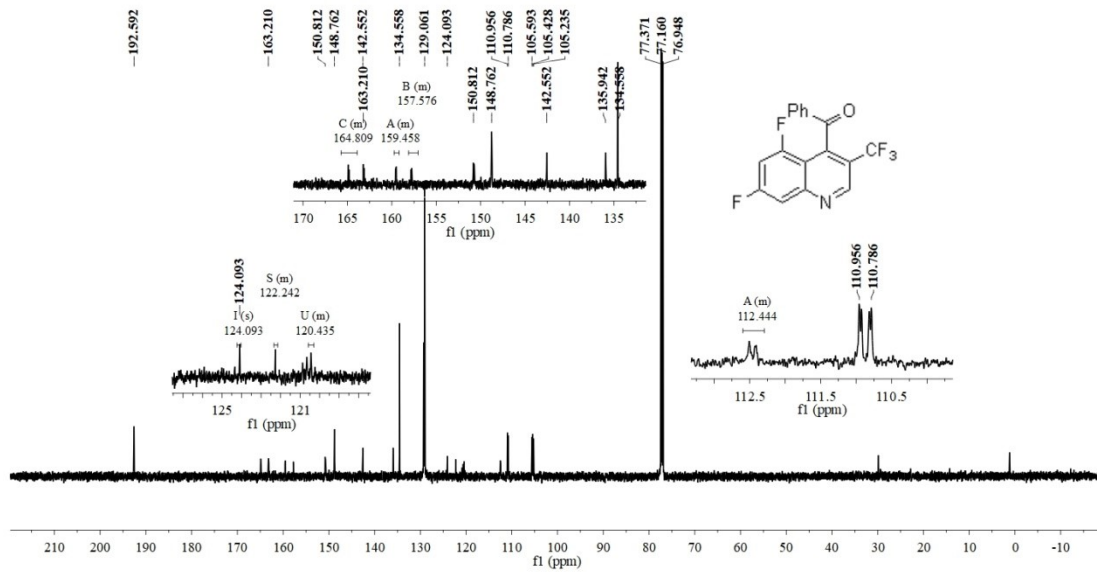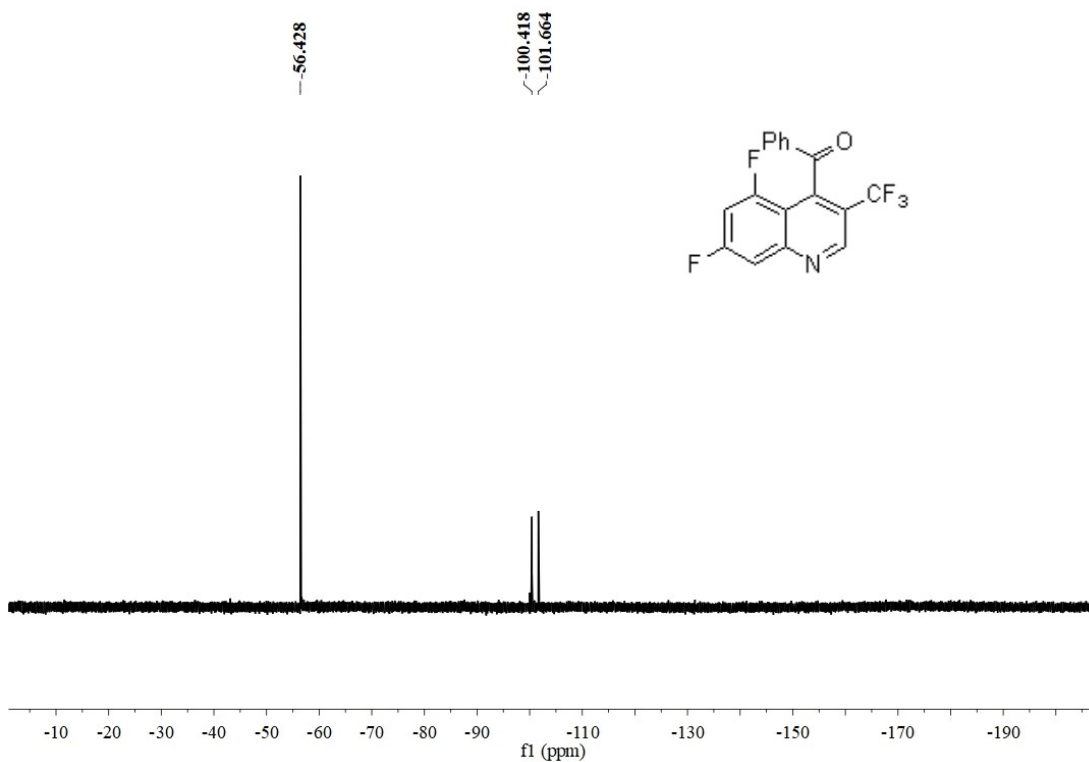

3va

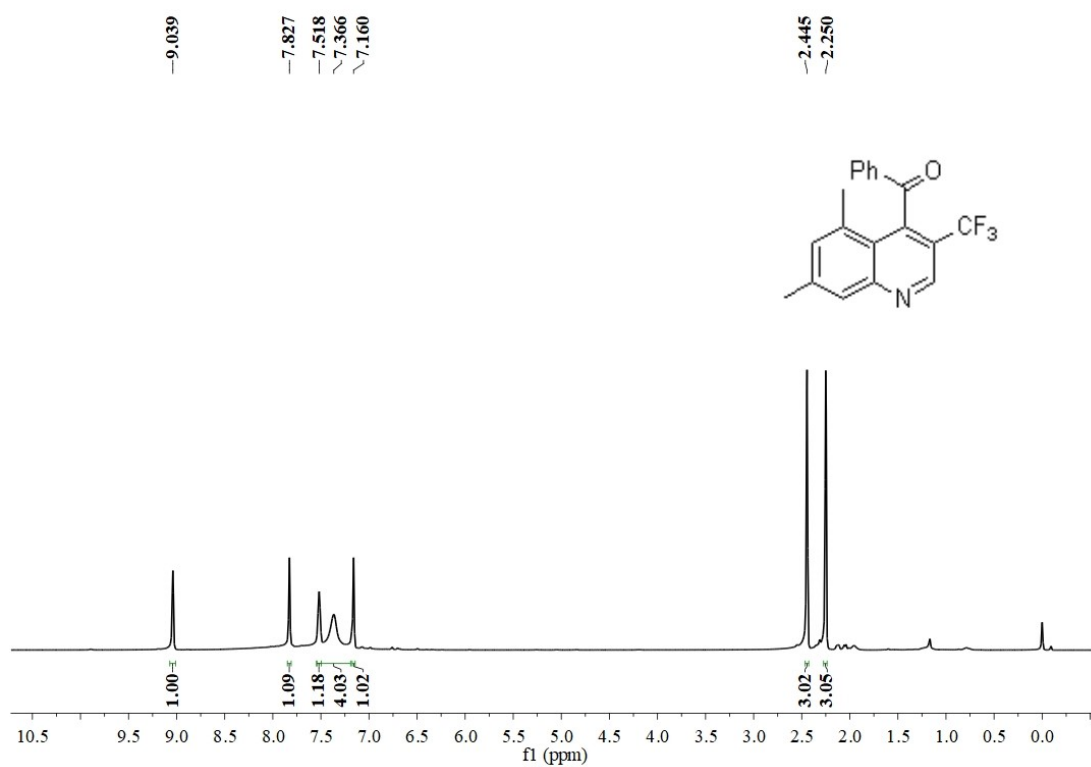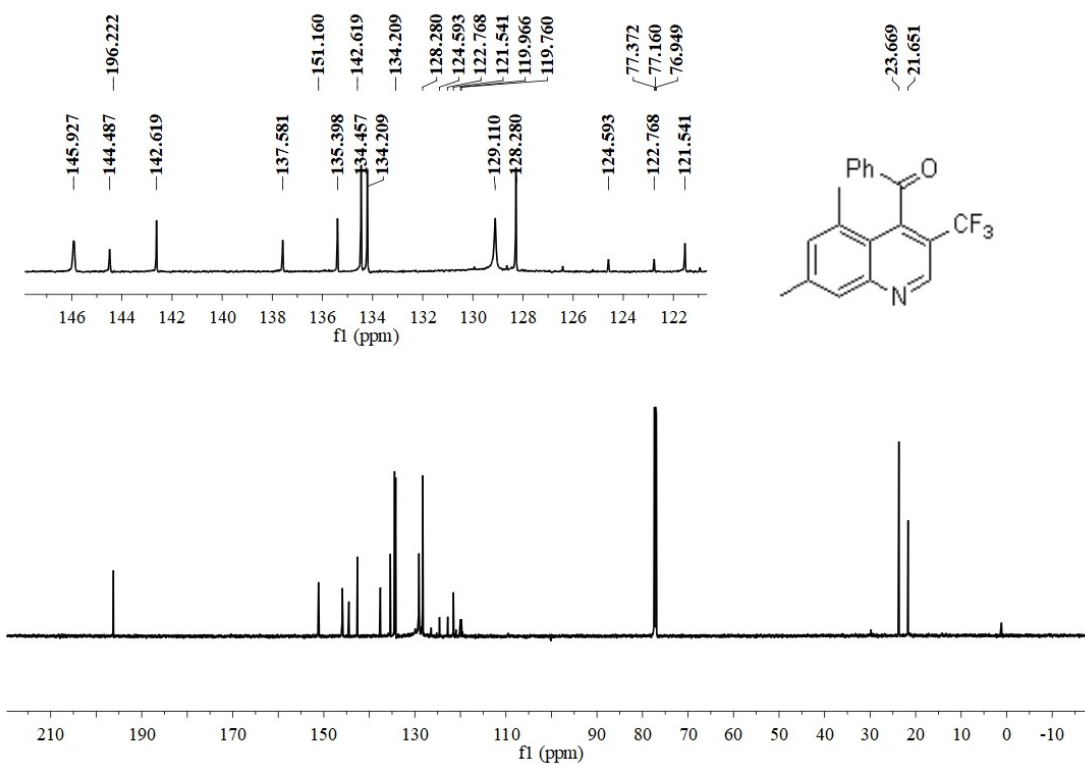

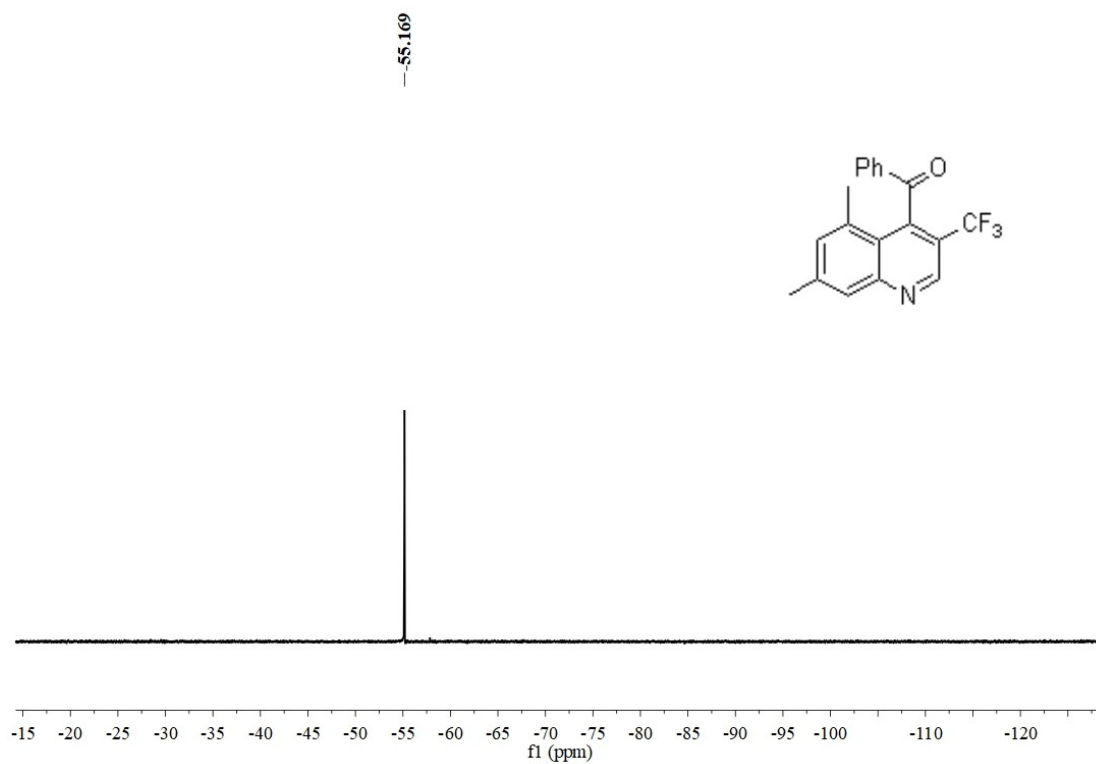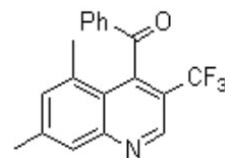

**3ab**

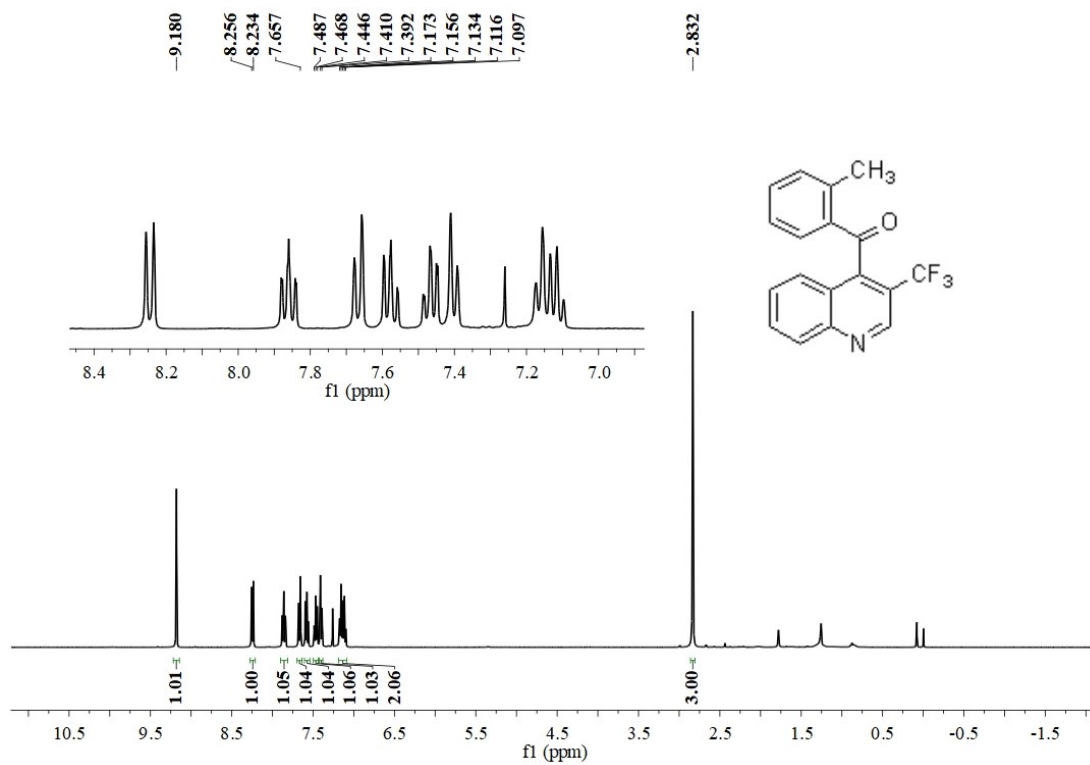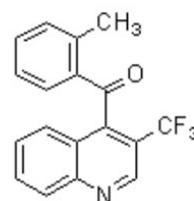

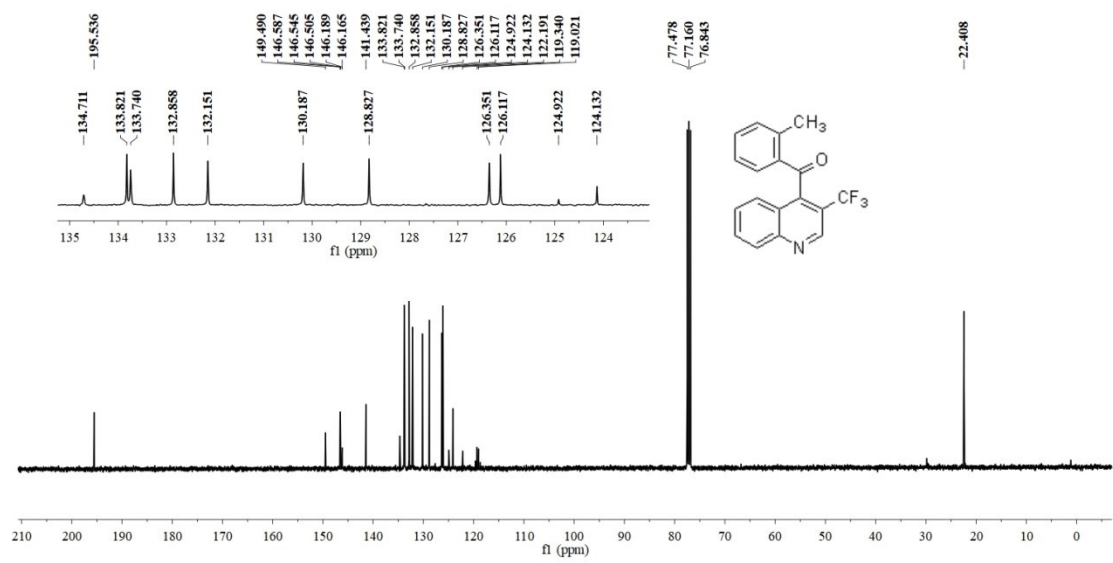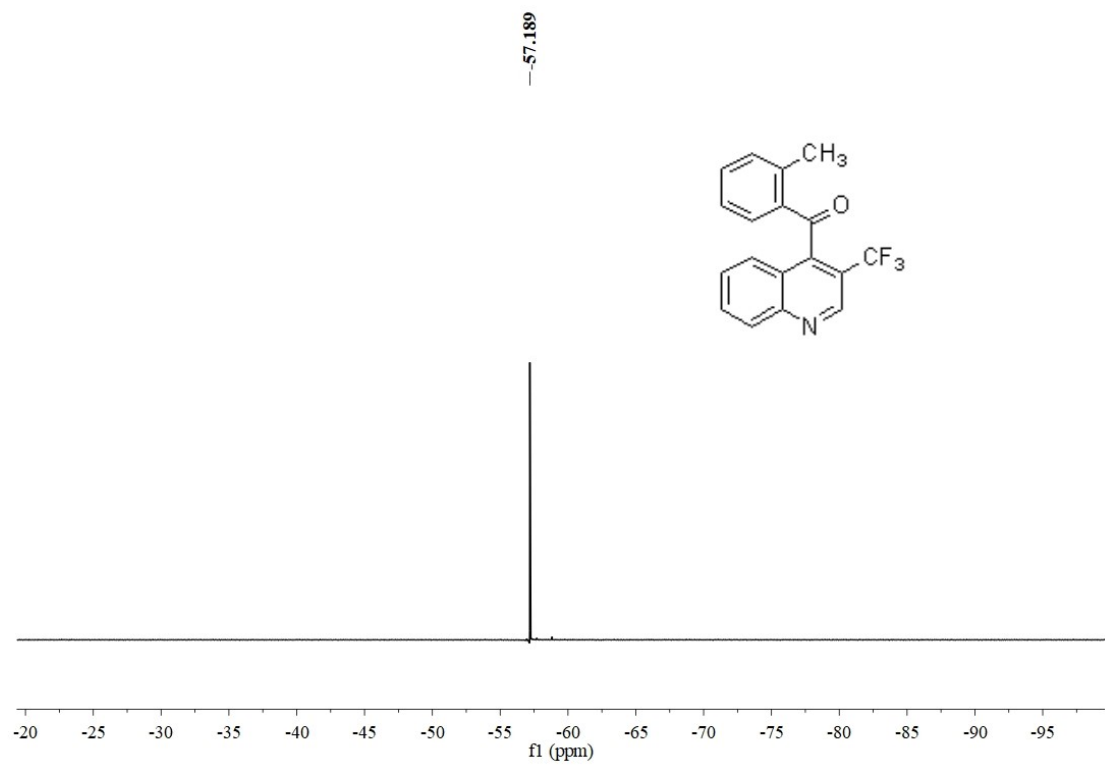

3ac

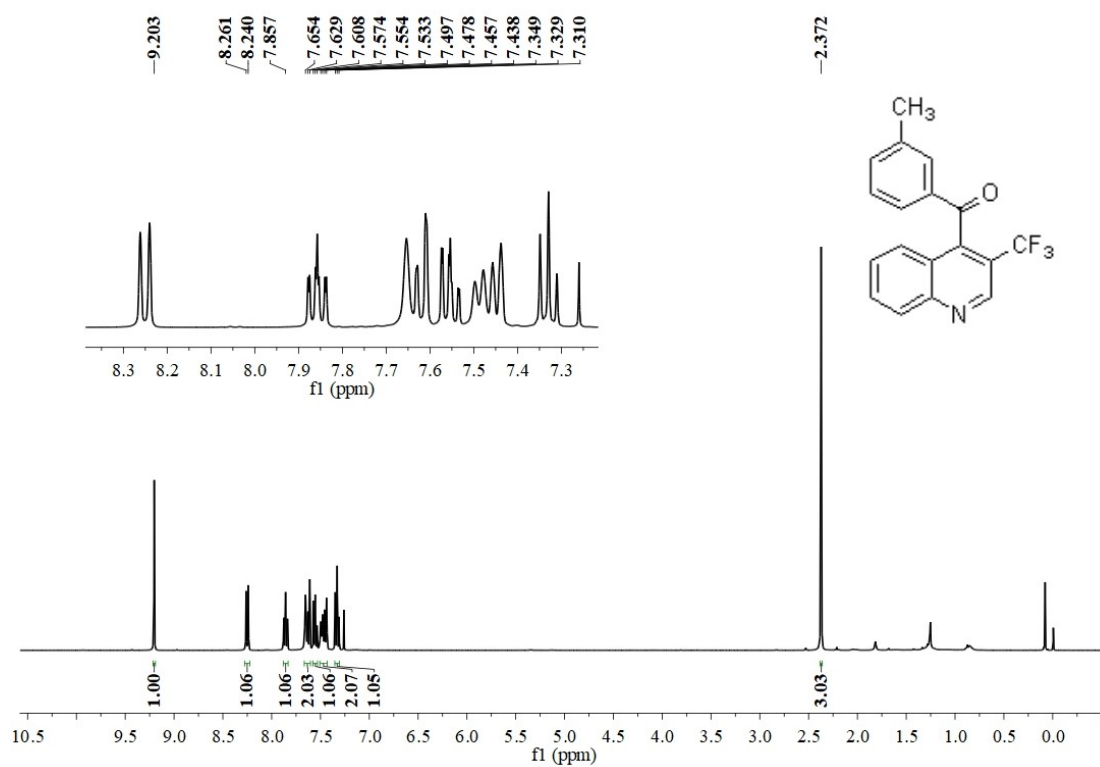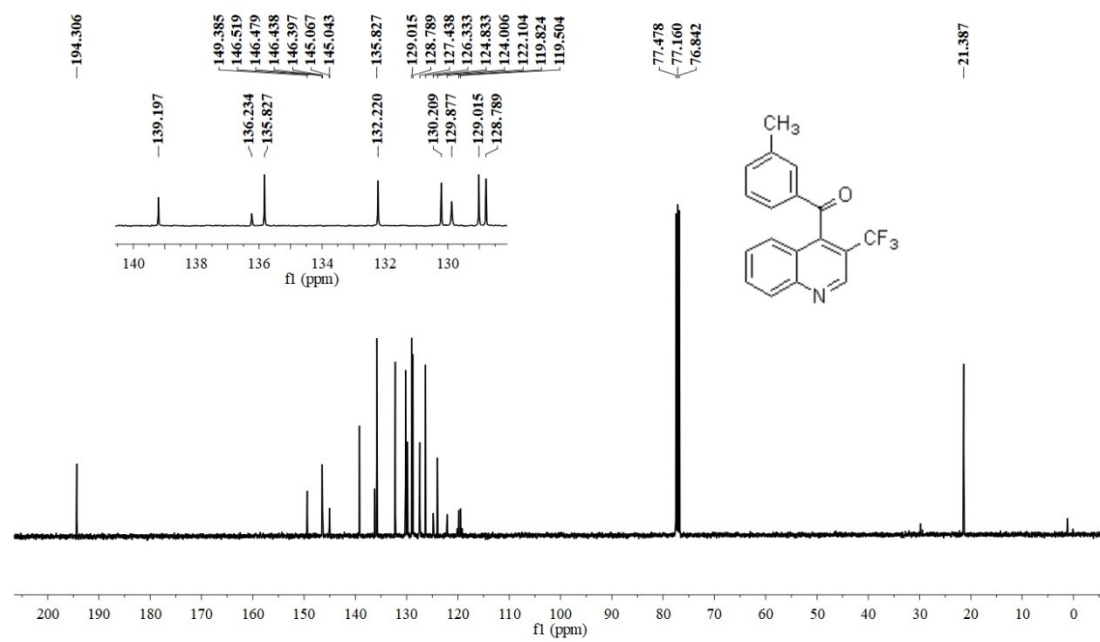

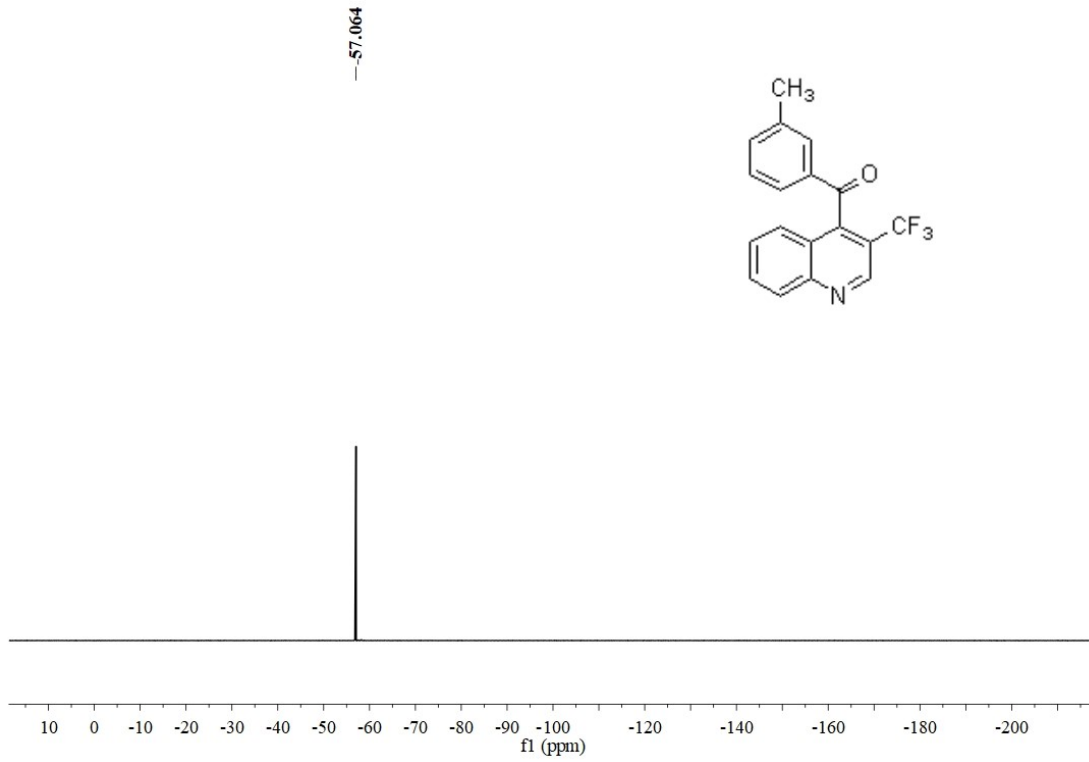

**3ad**

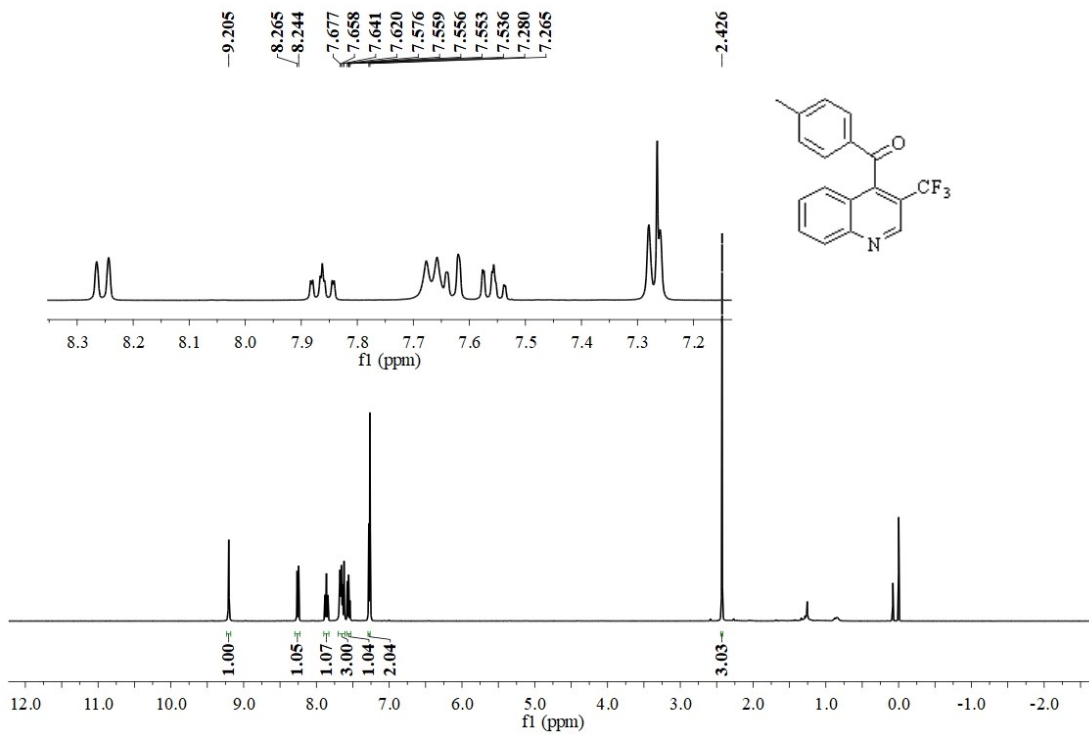

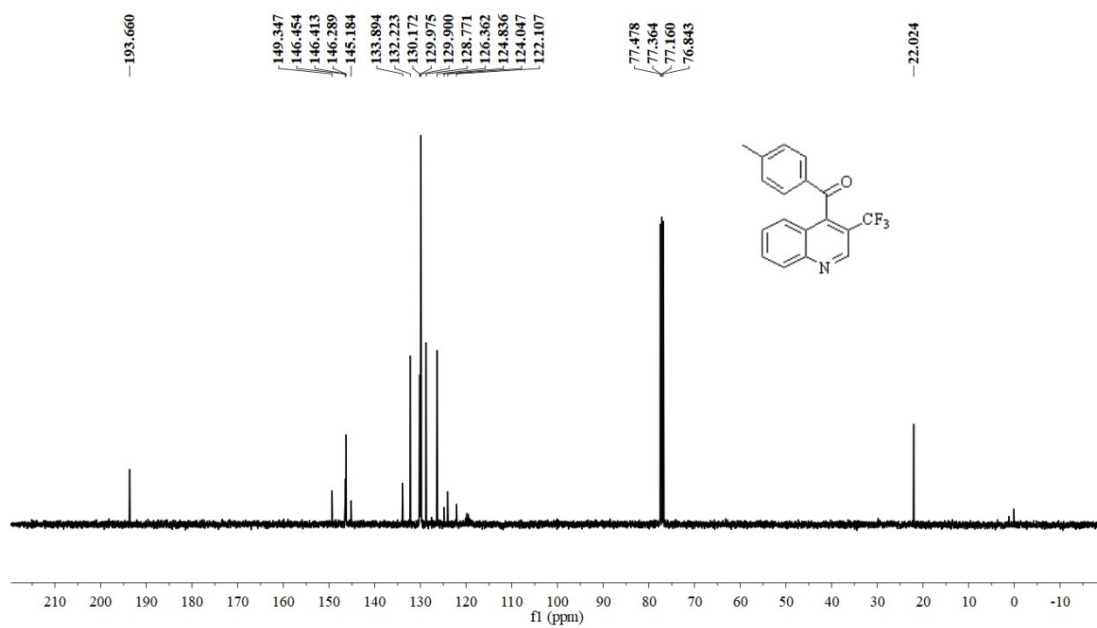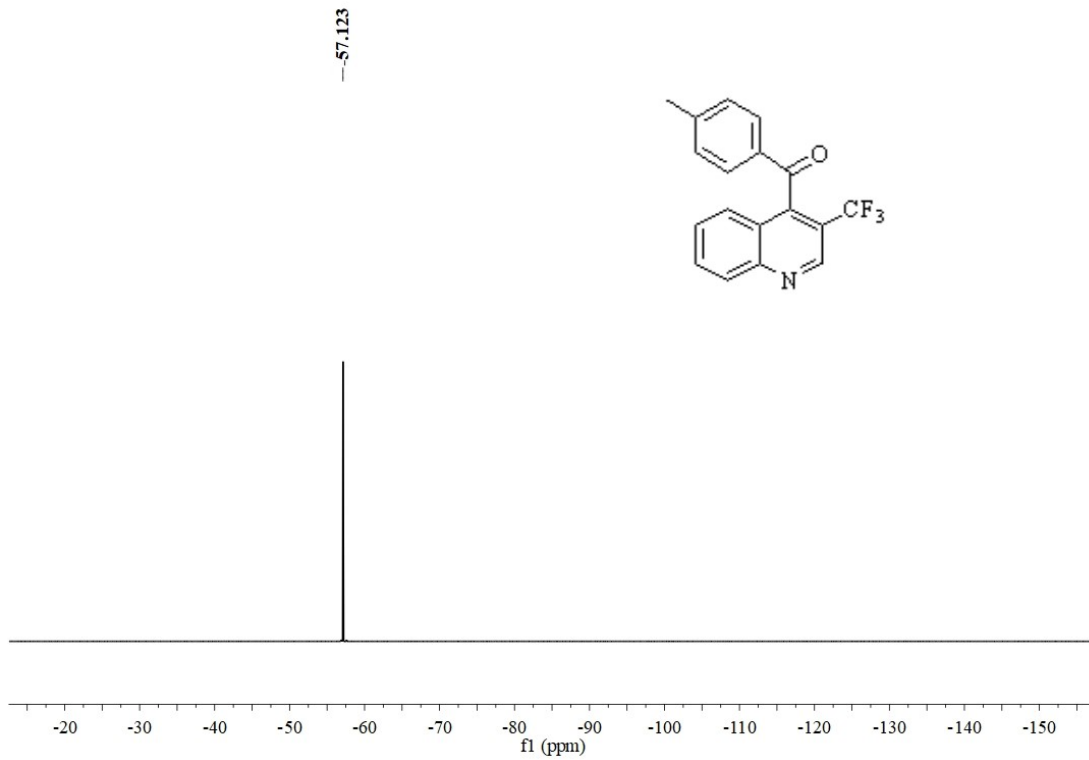



## 3ae

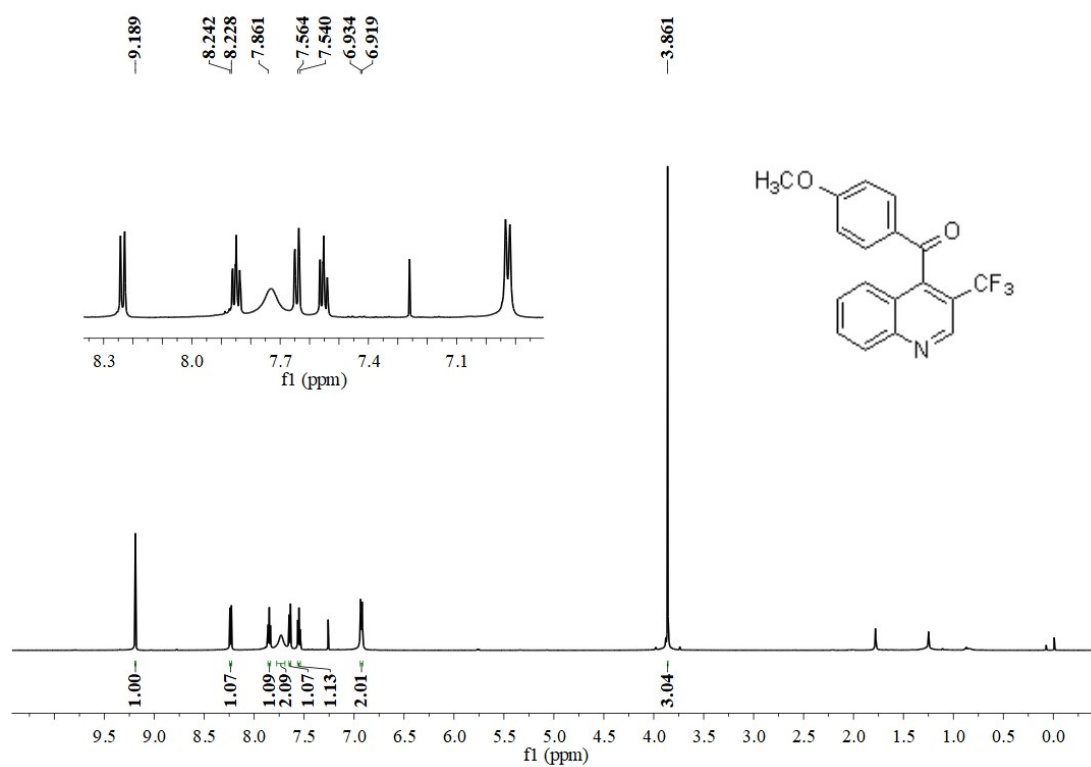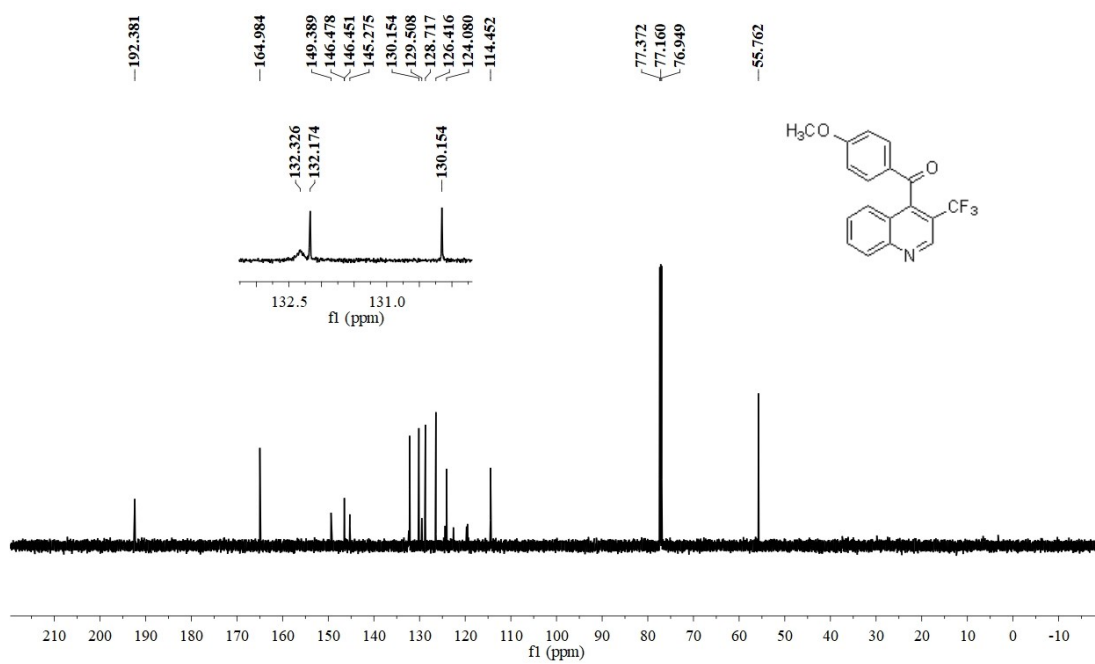

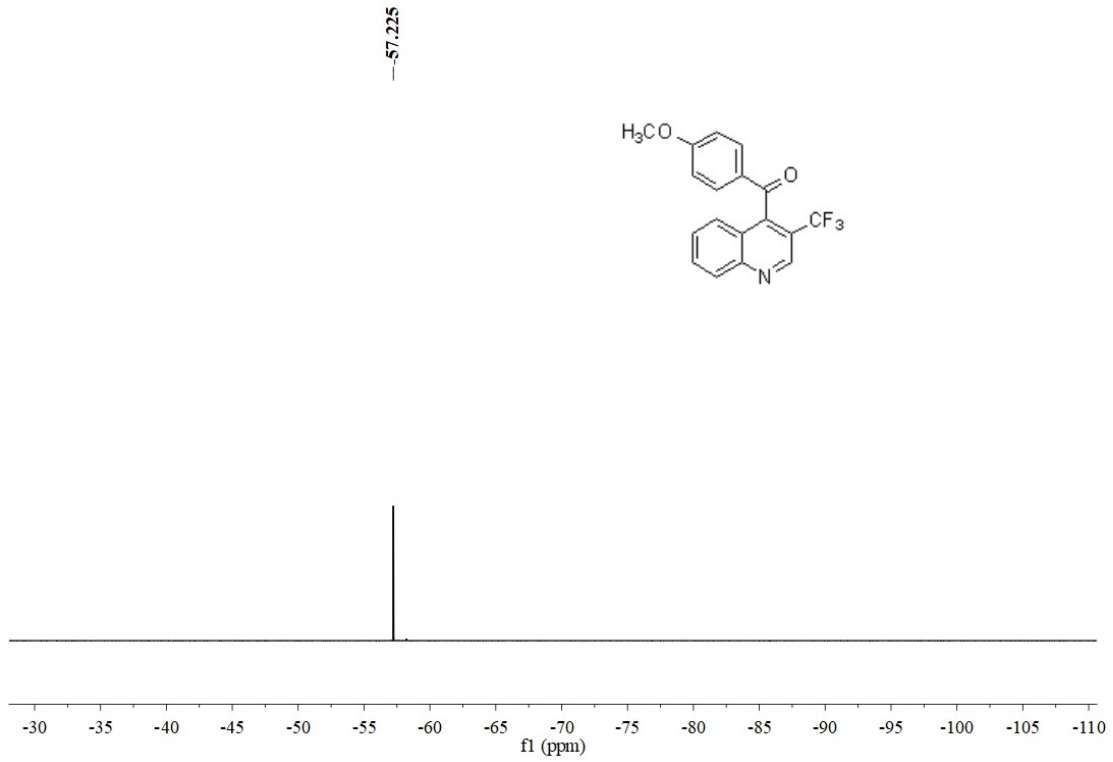

### 3af

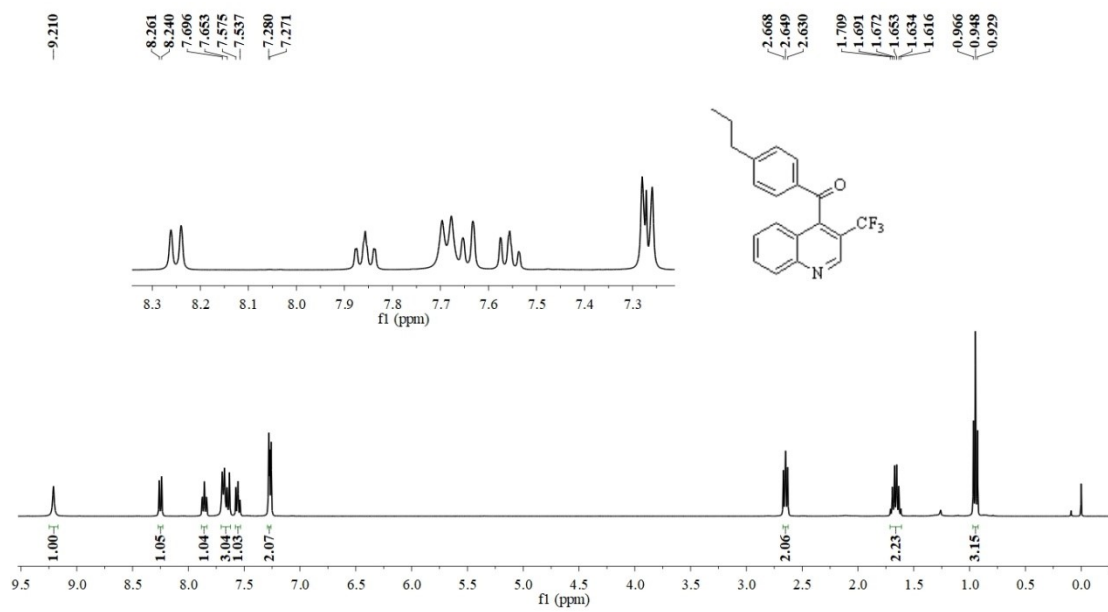

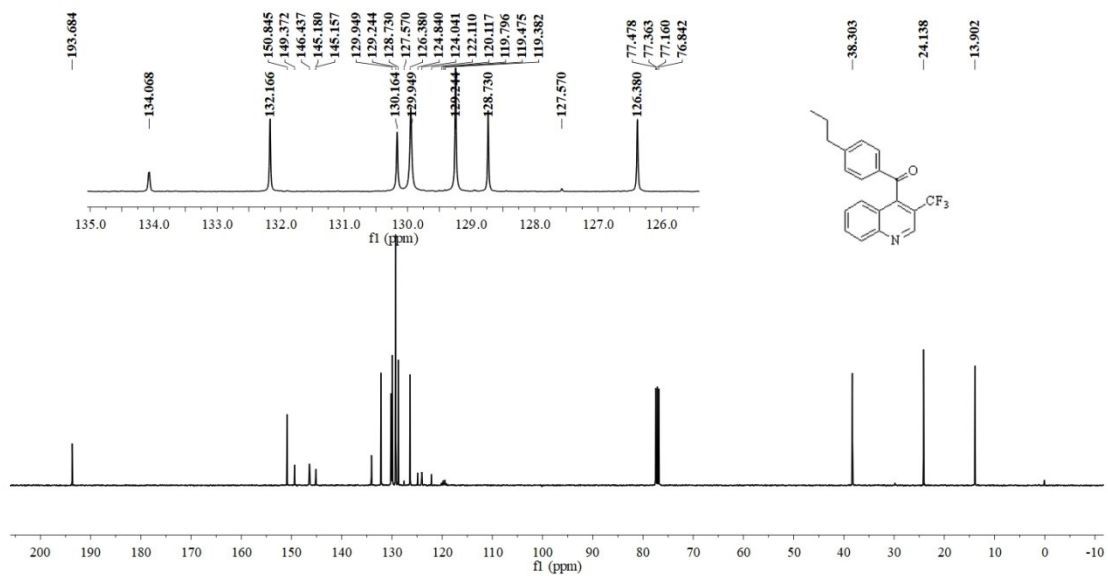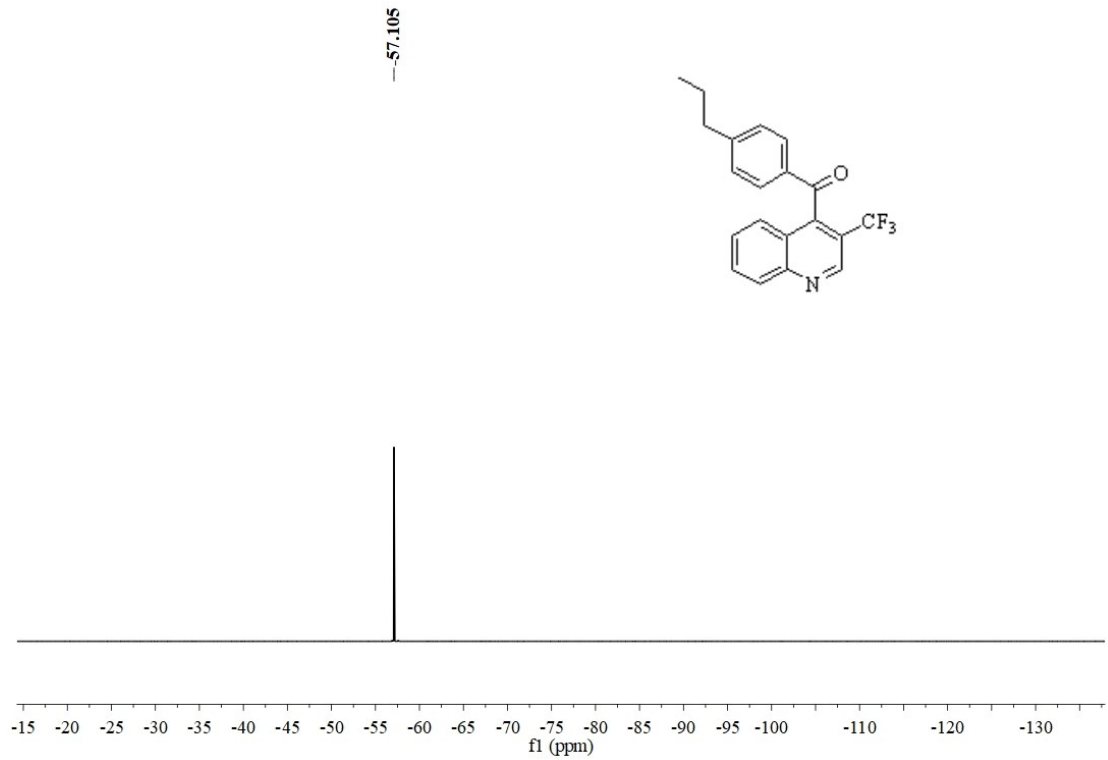

3ag

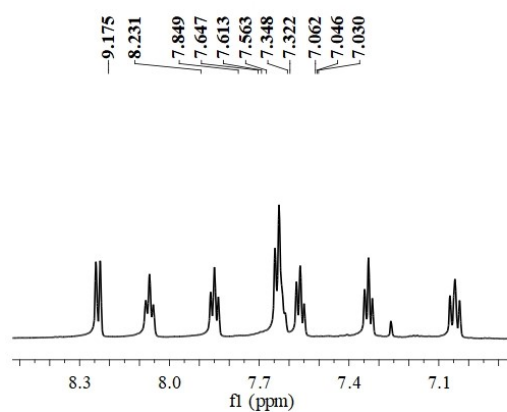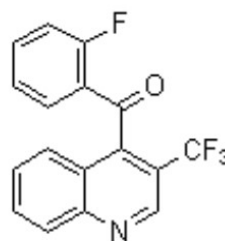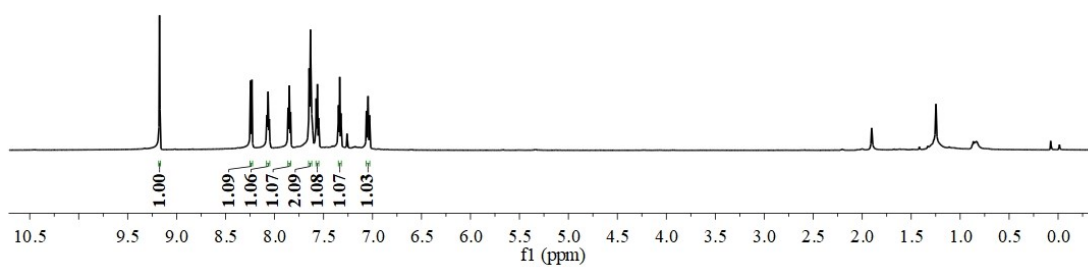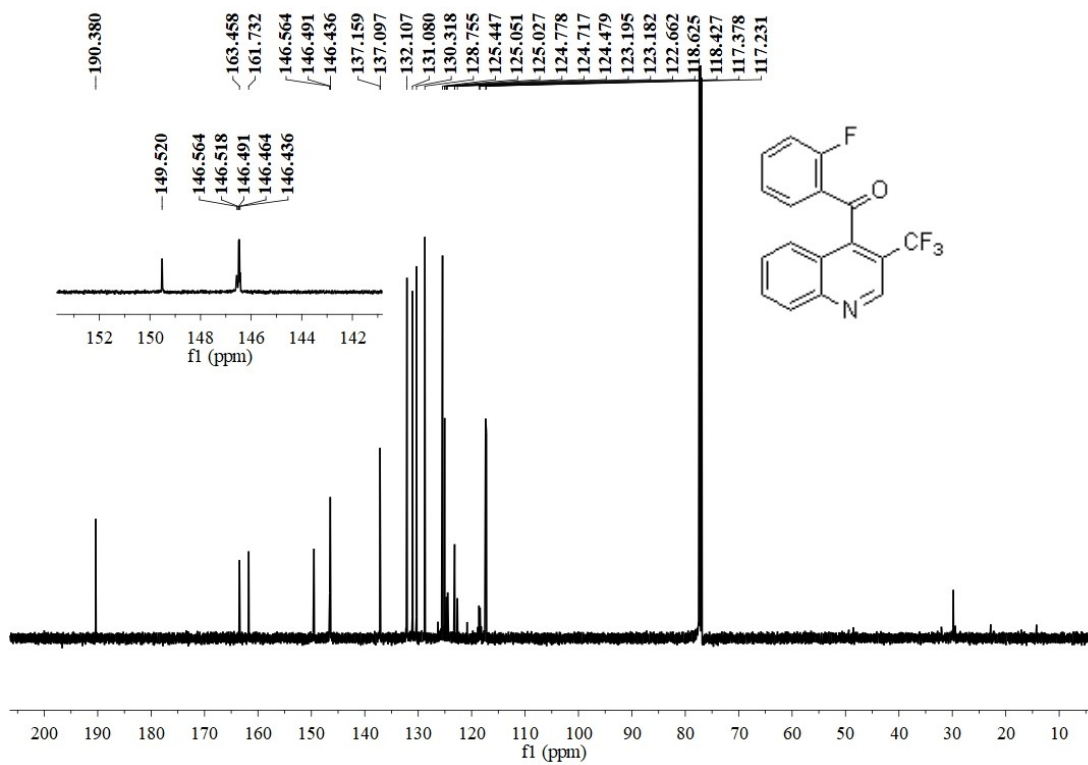

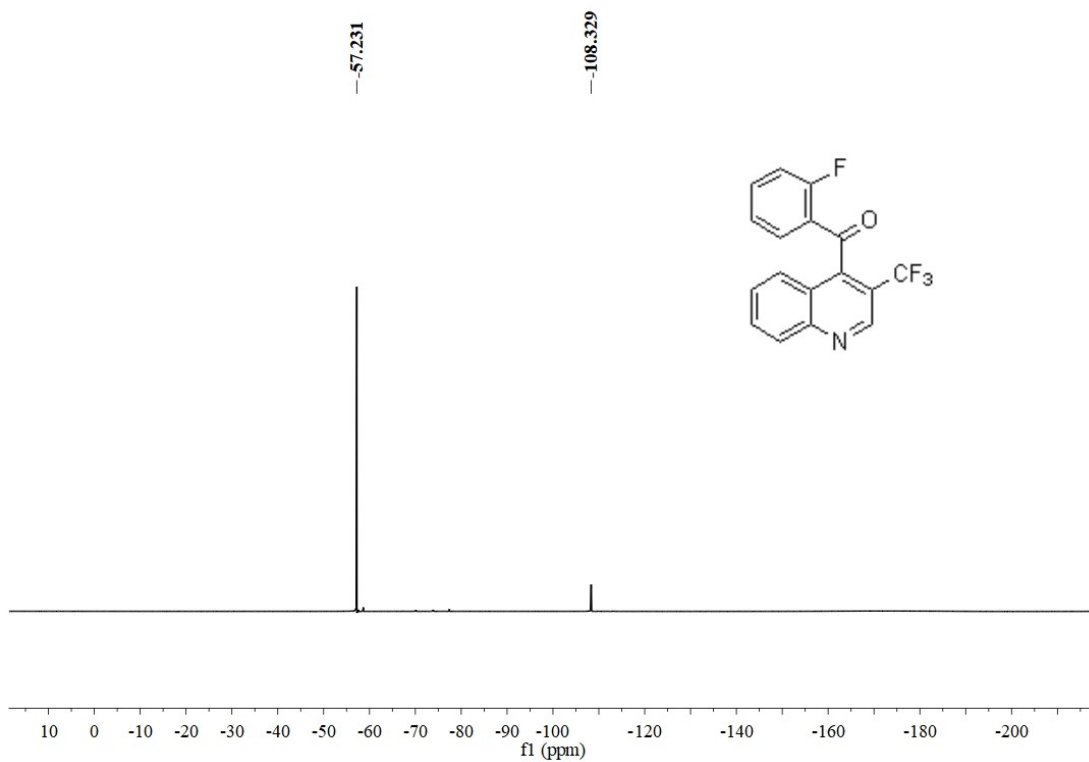

3ah

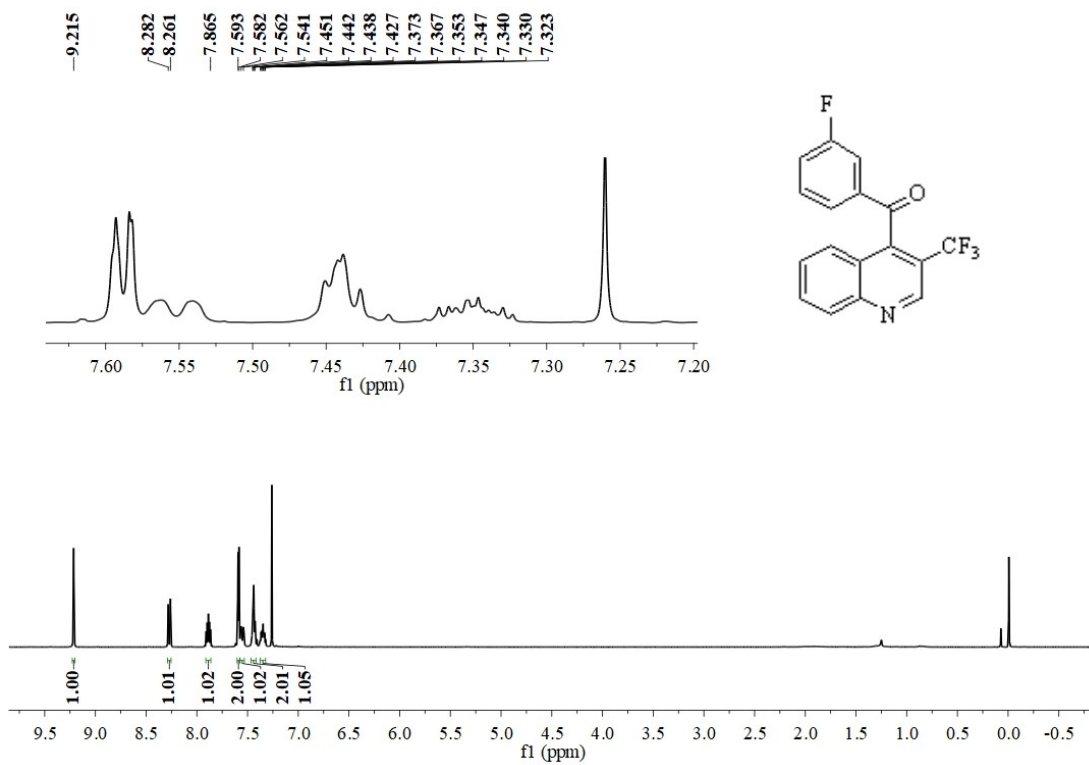

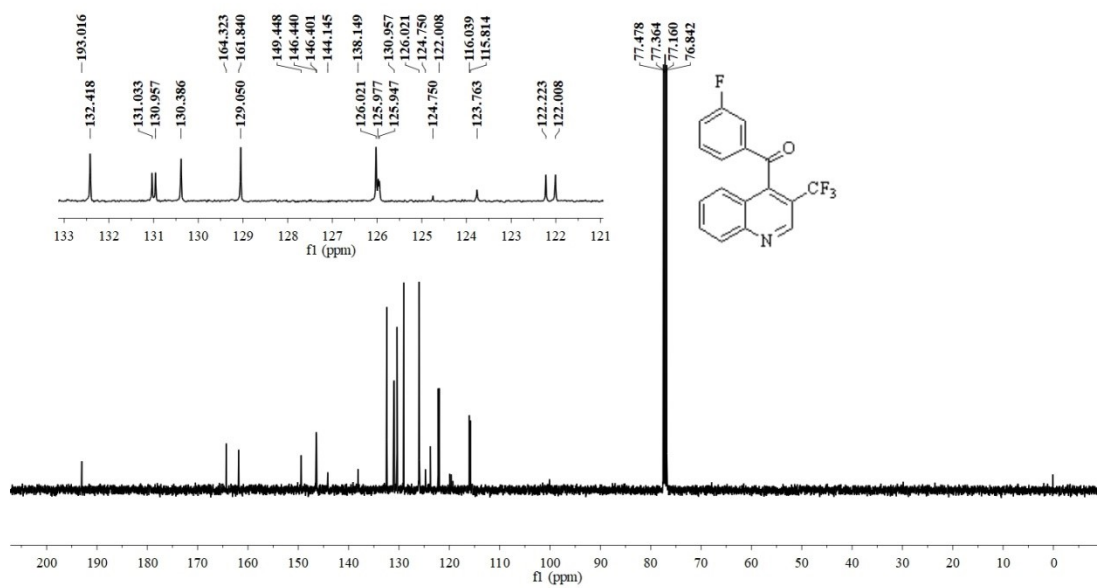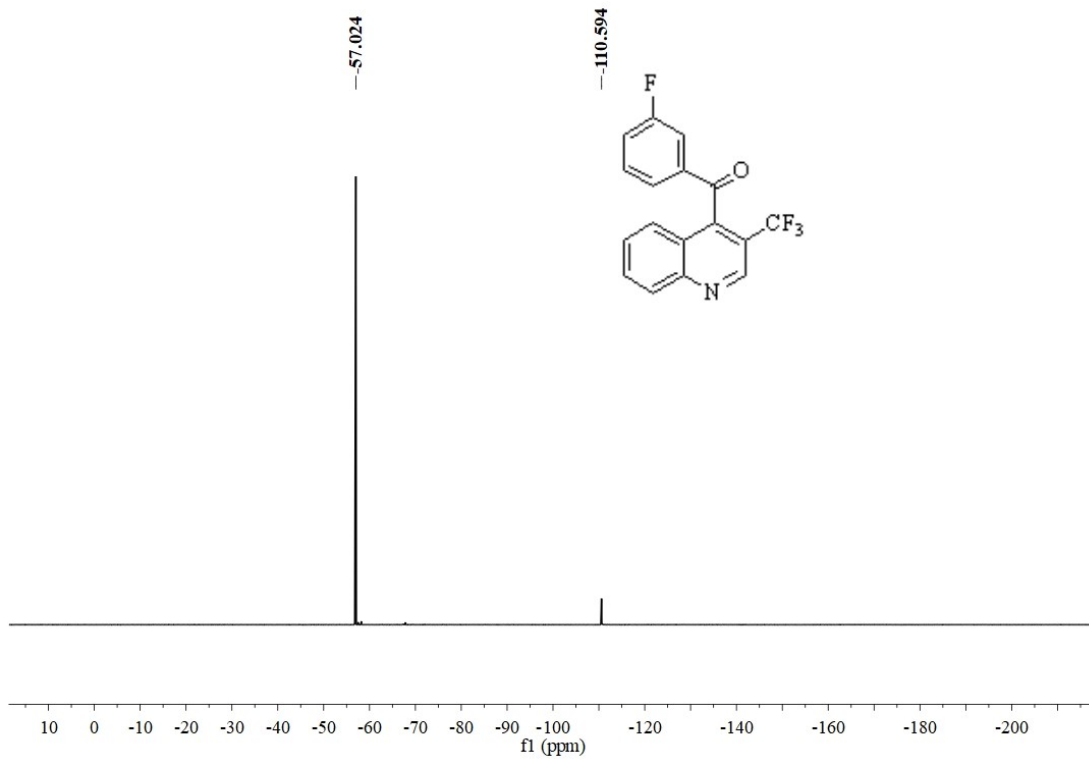

3ai

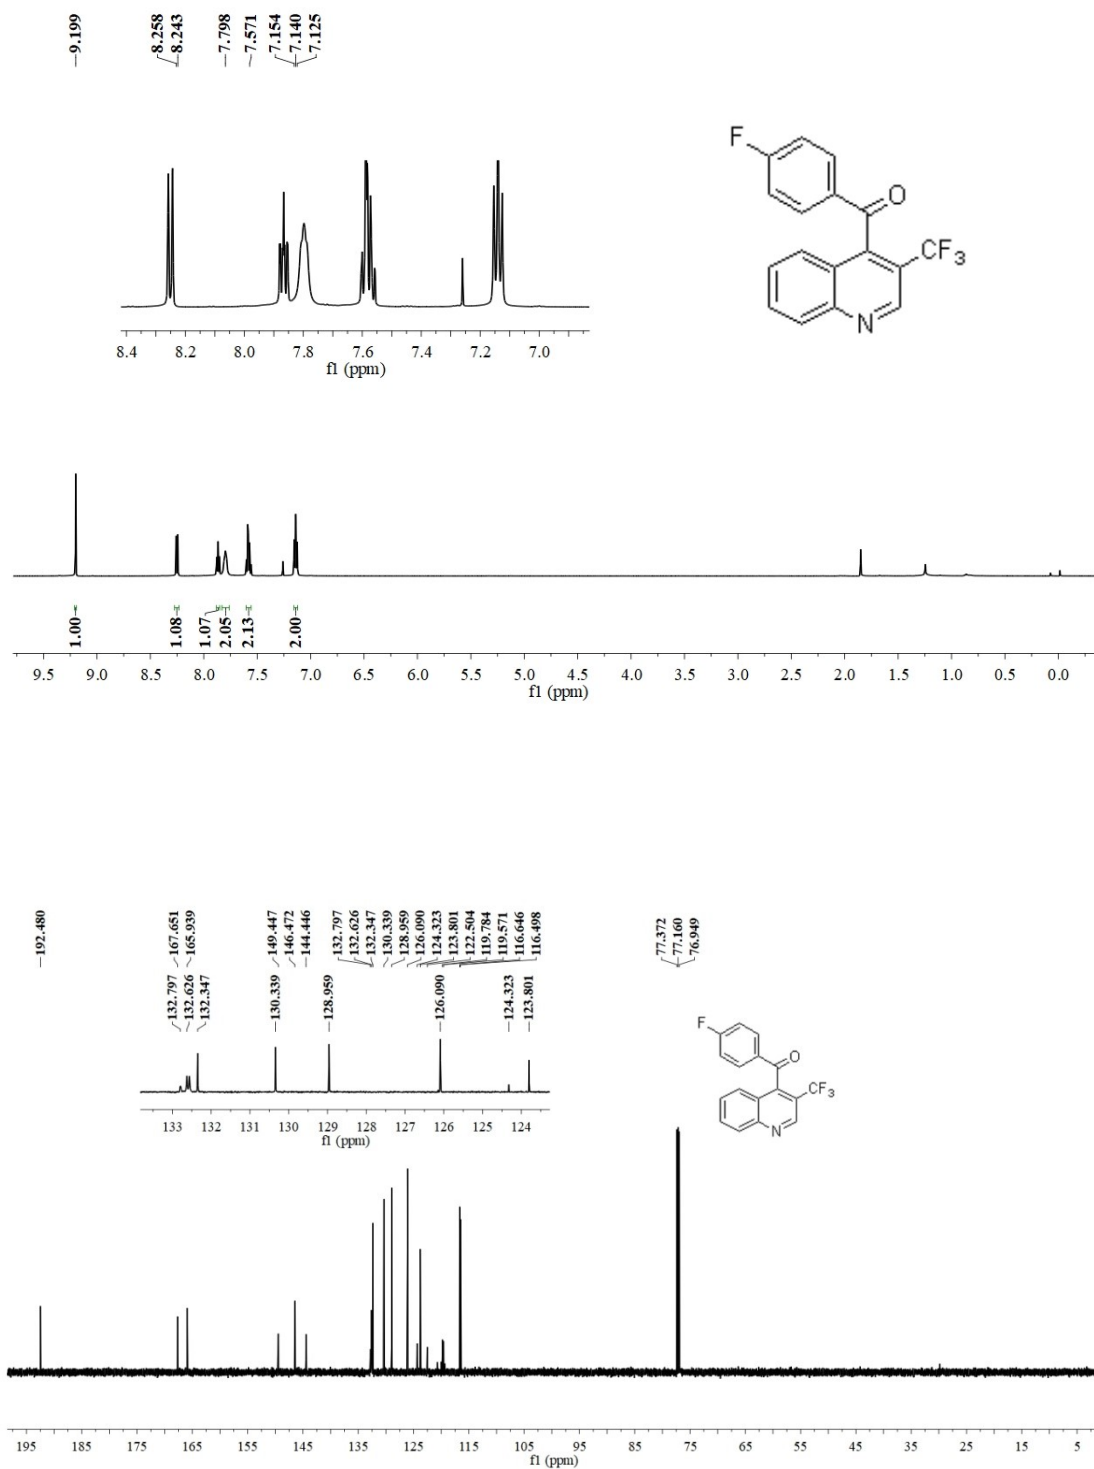

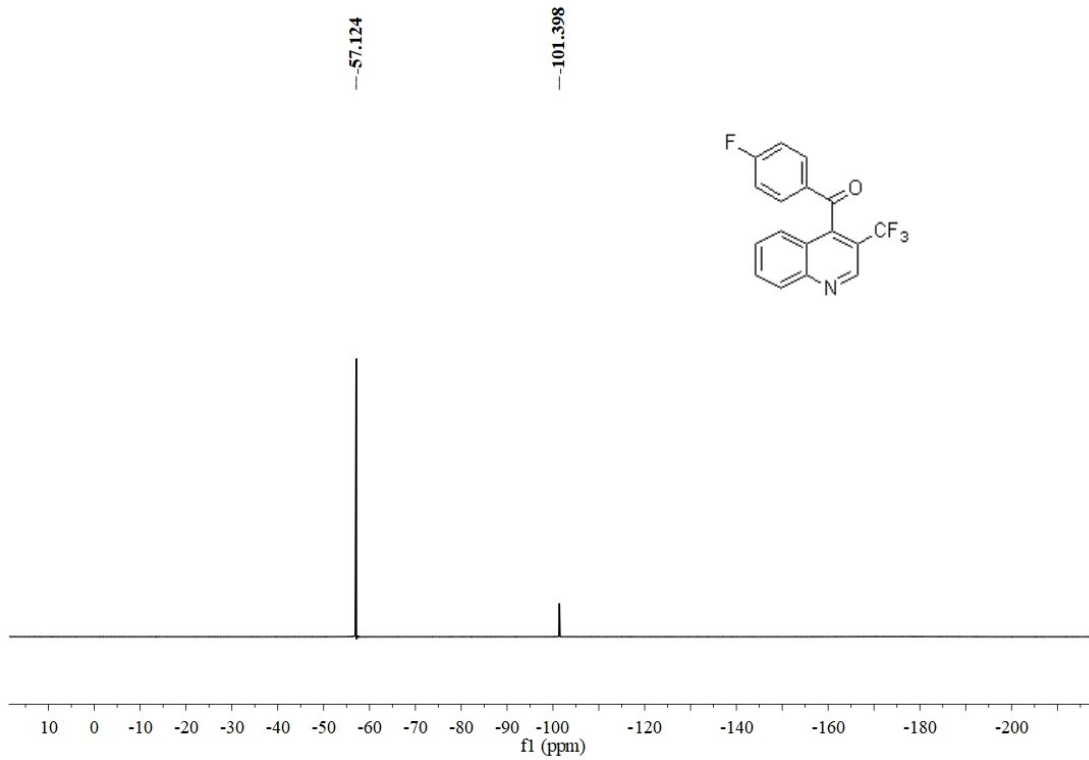

**3aj**

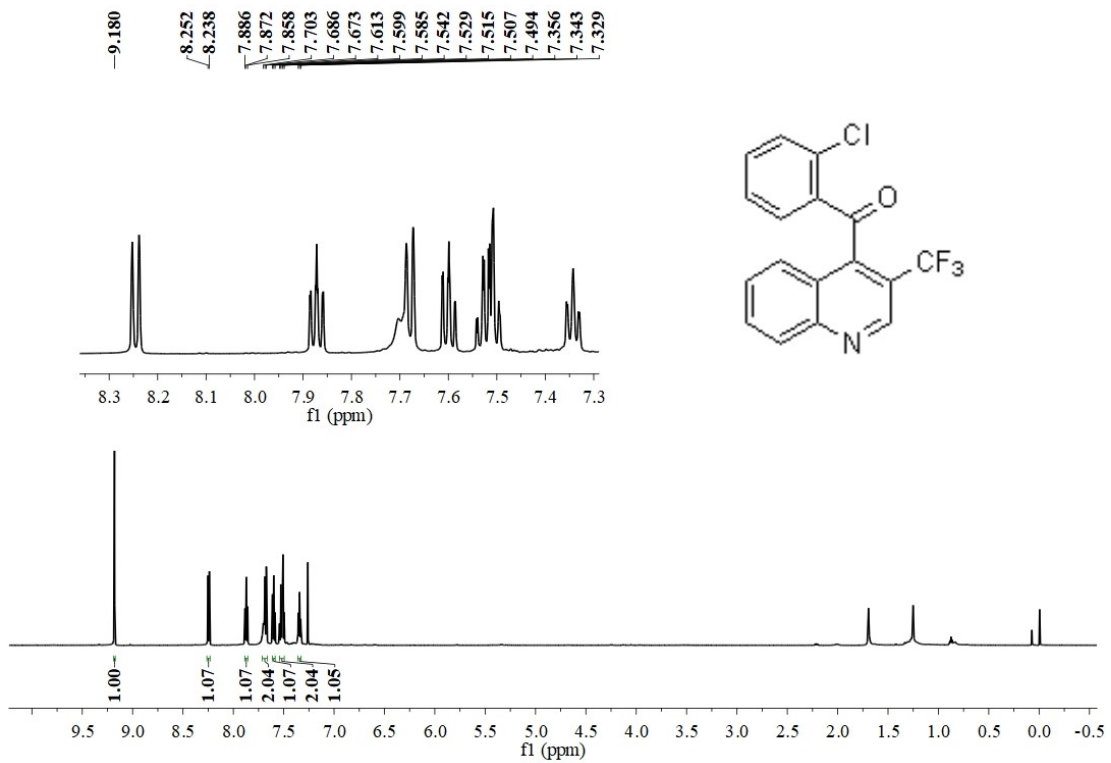



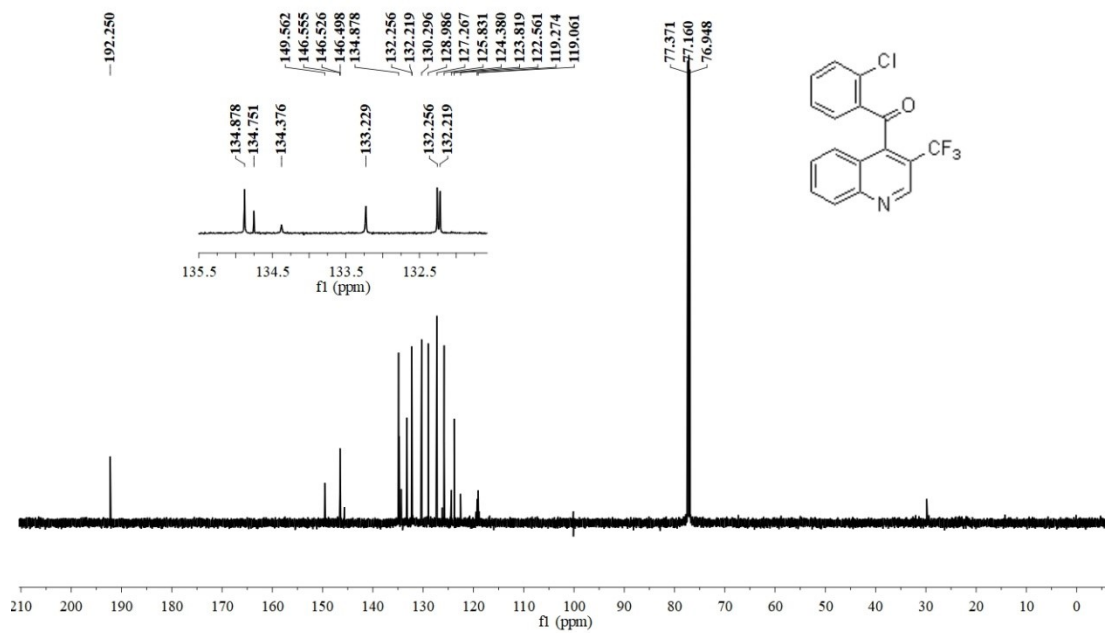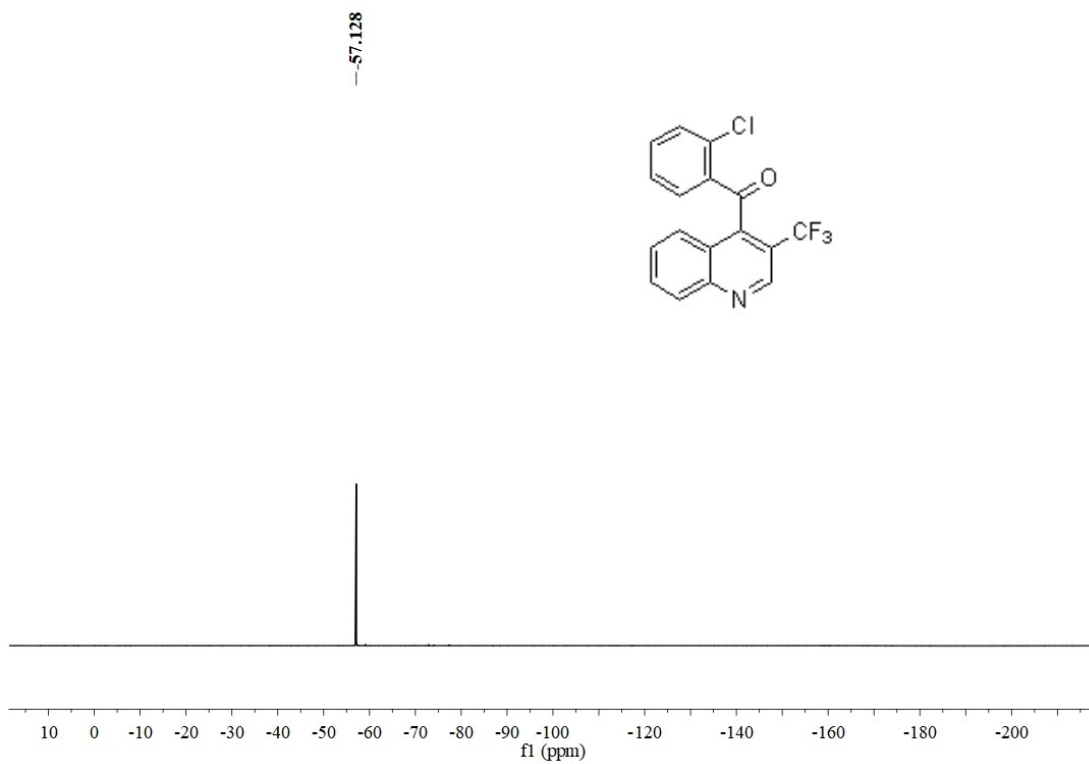

3ak

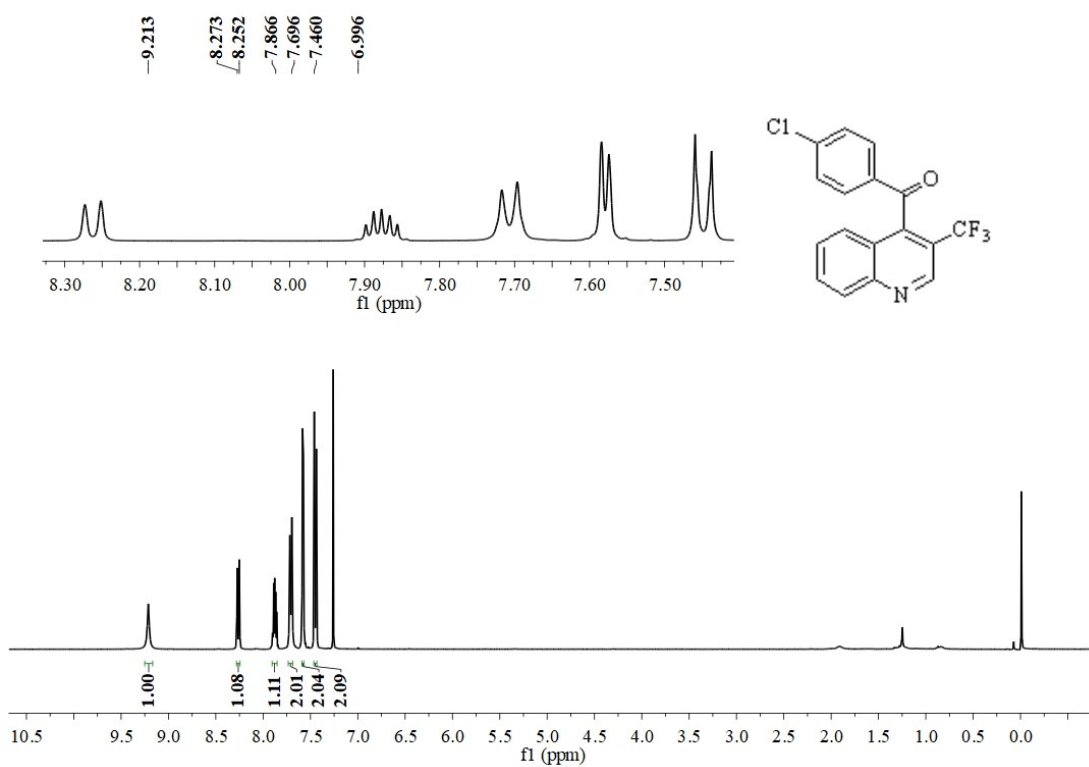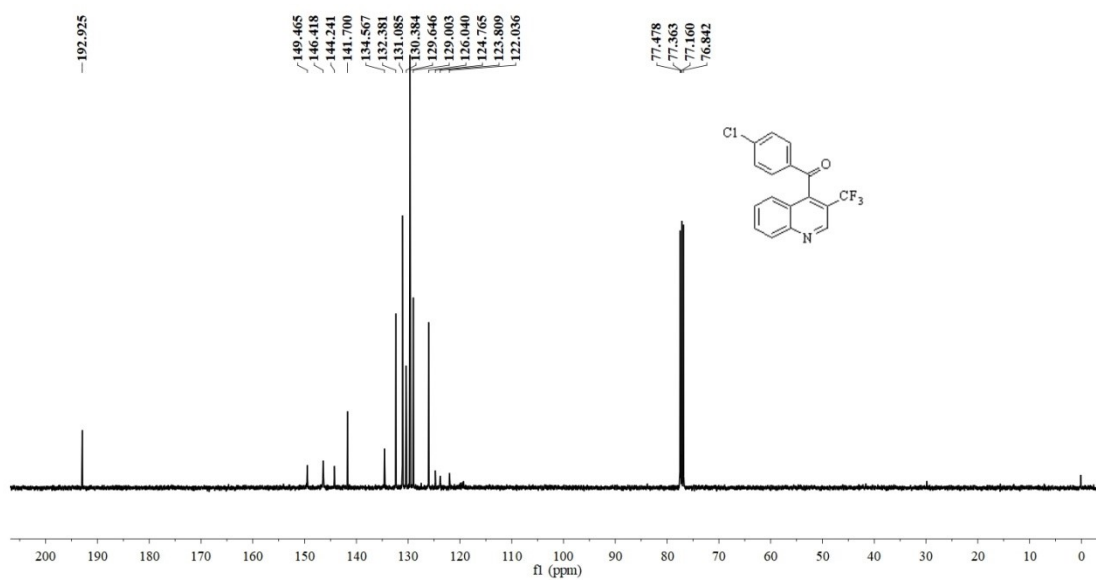

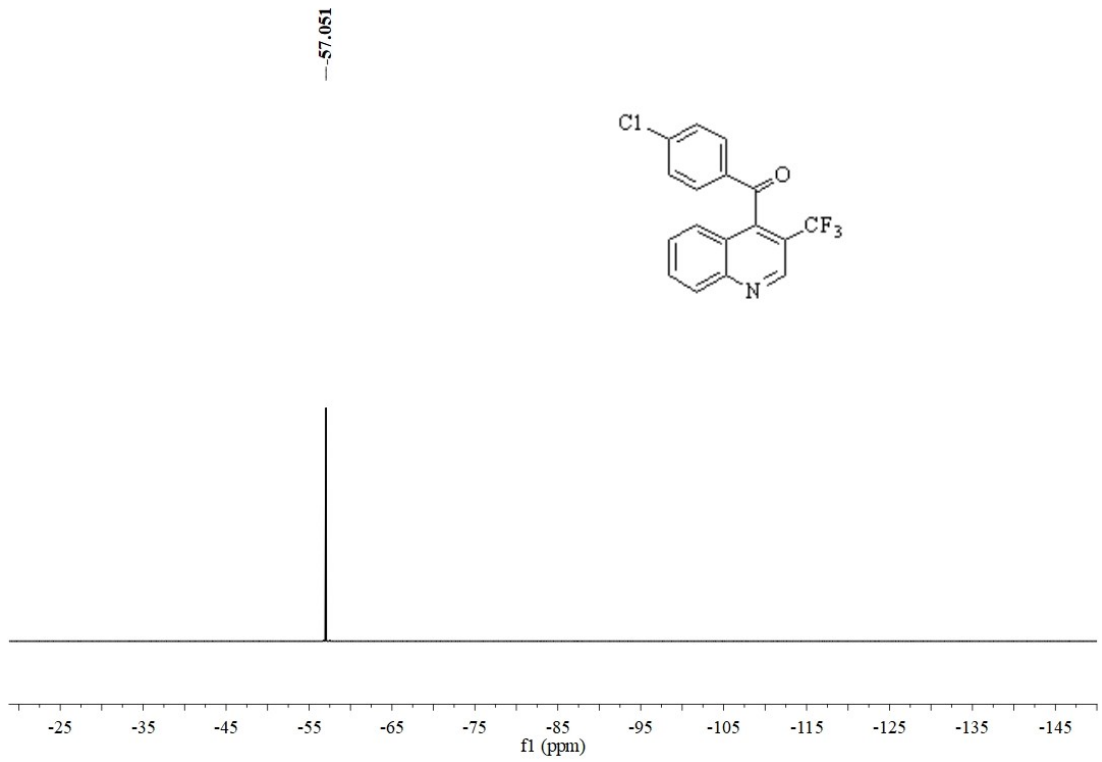

**3a1**

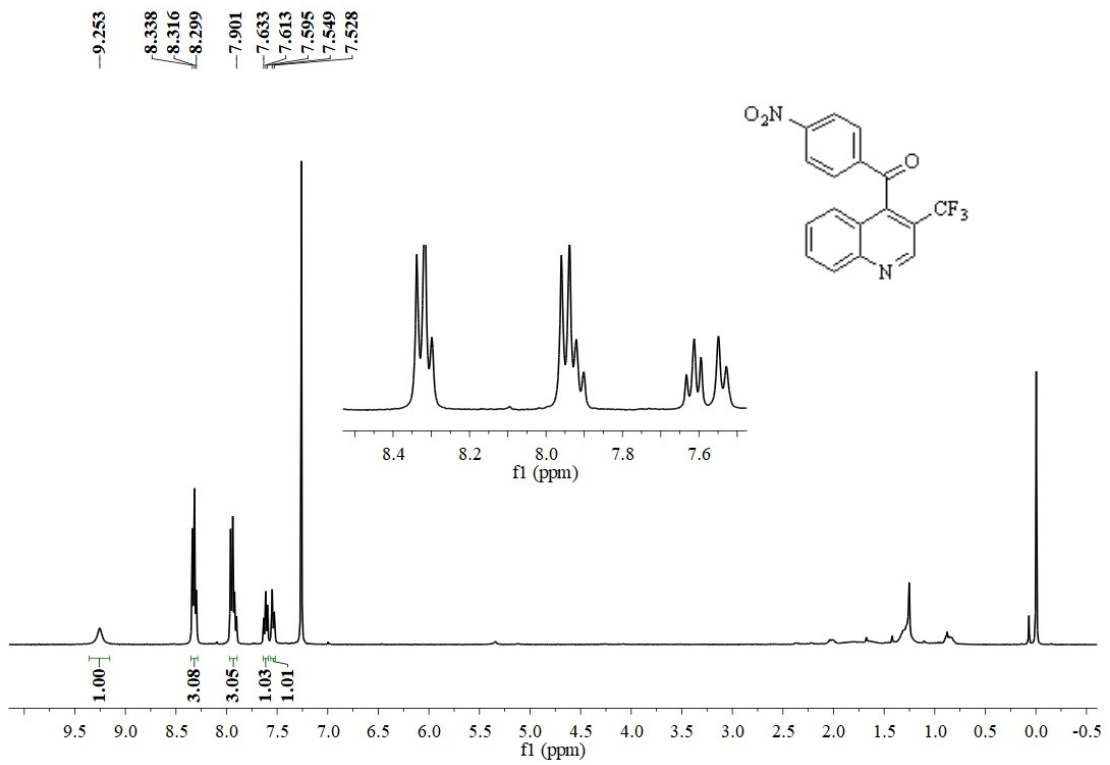

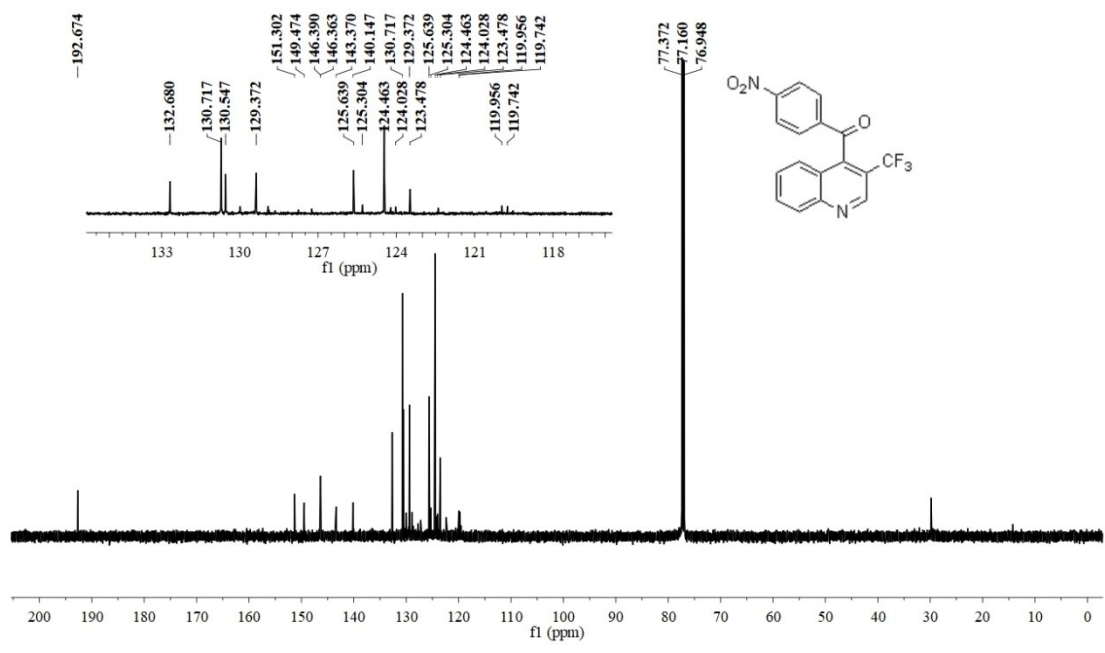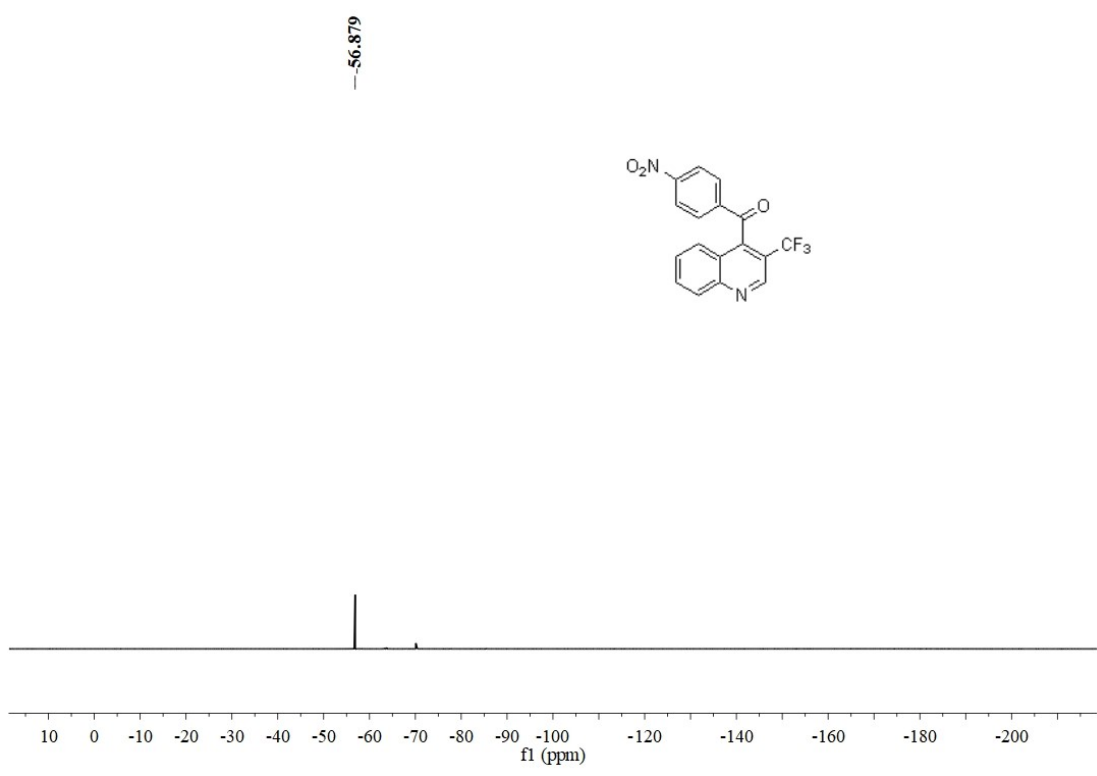

3am

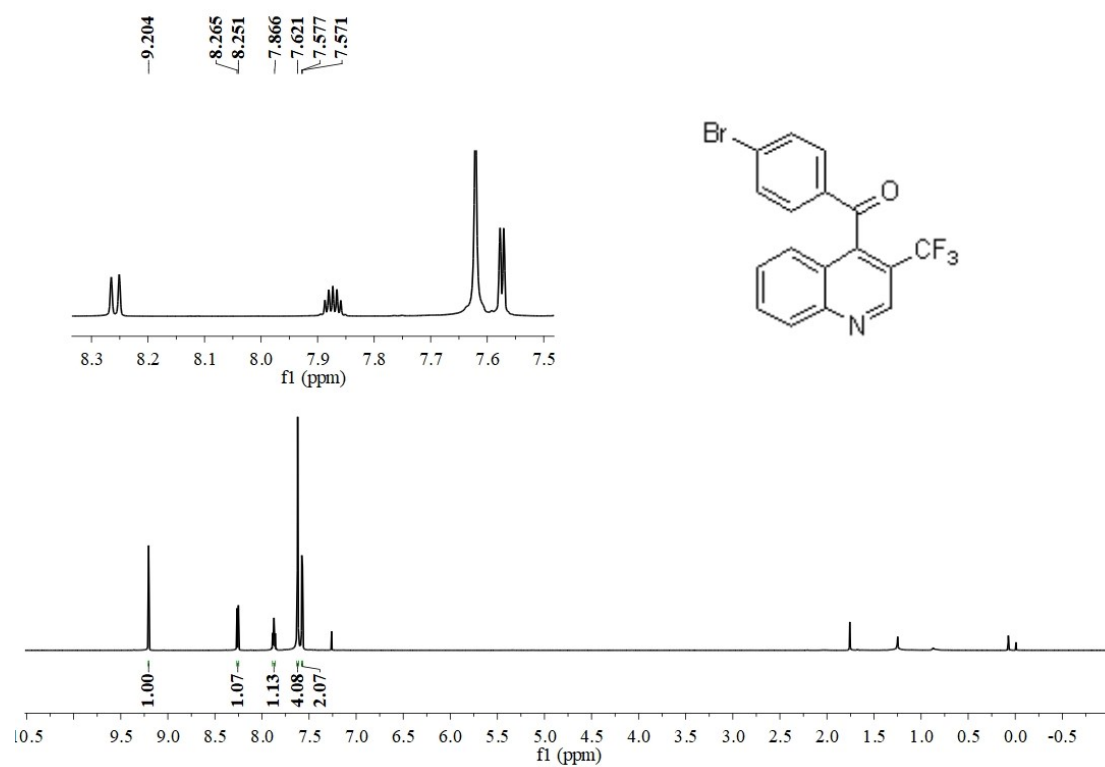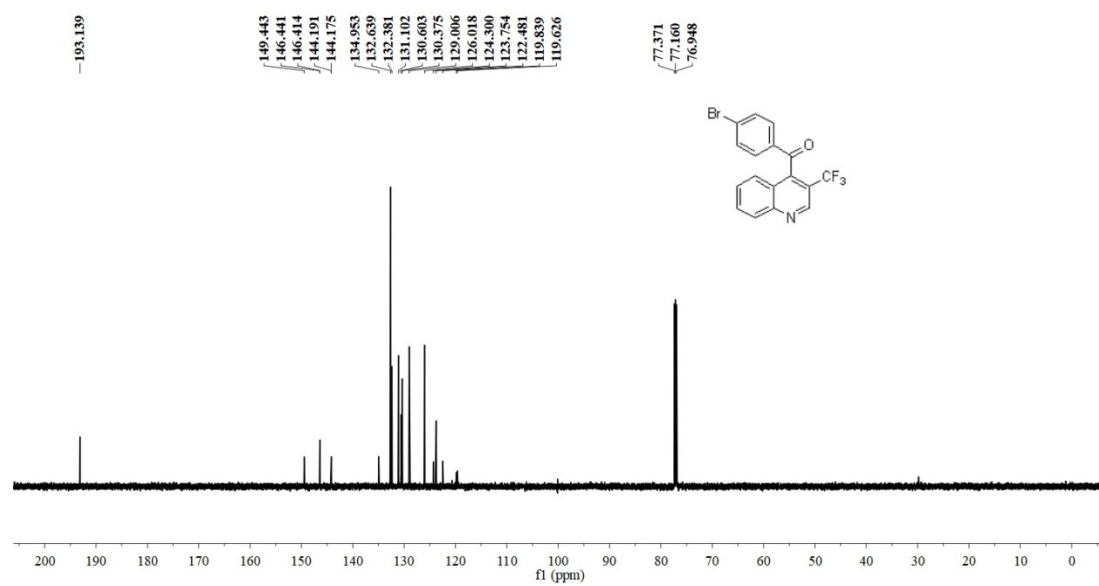

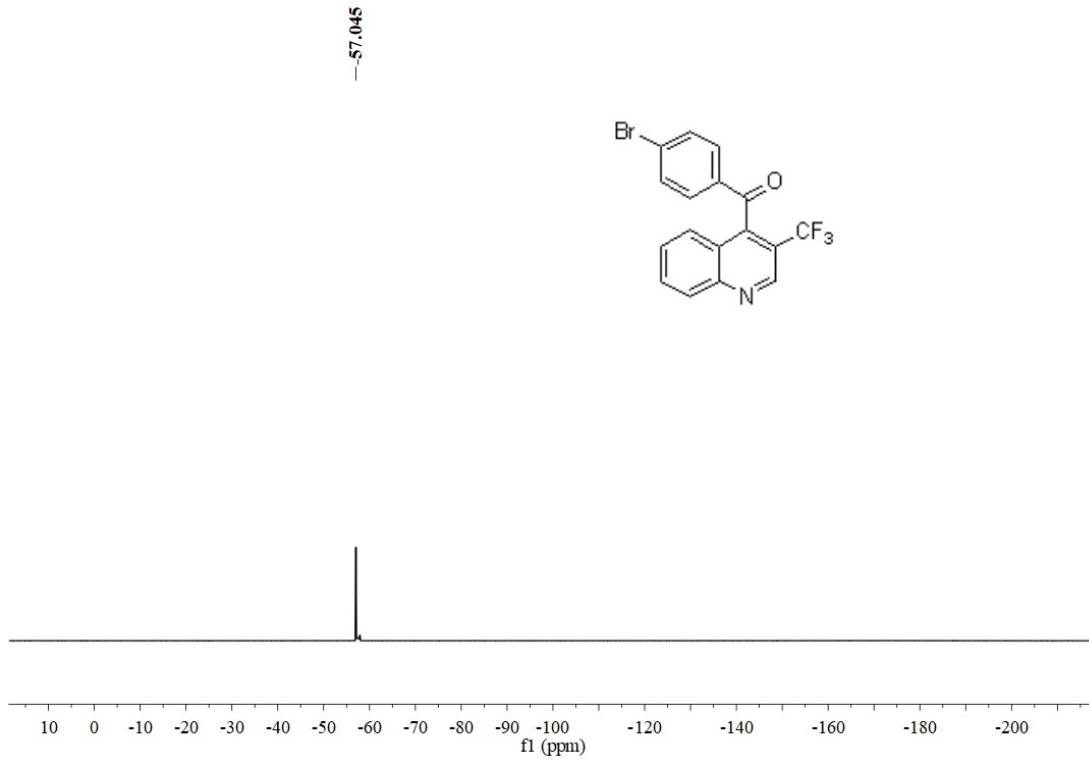

**3an**

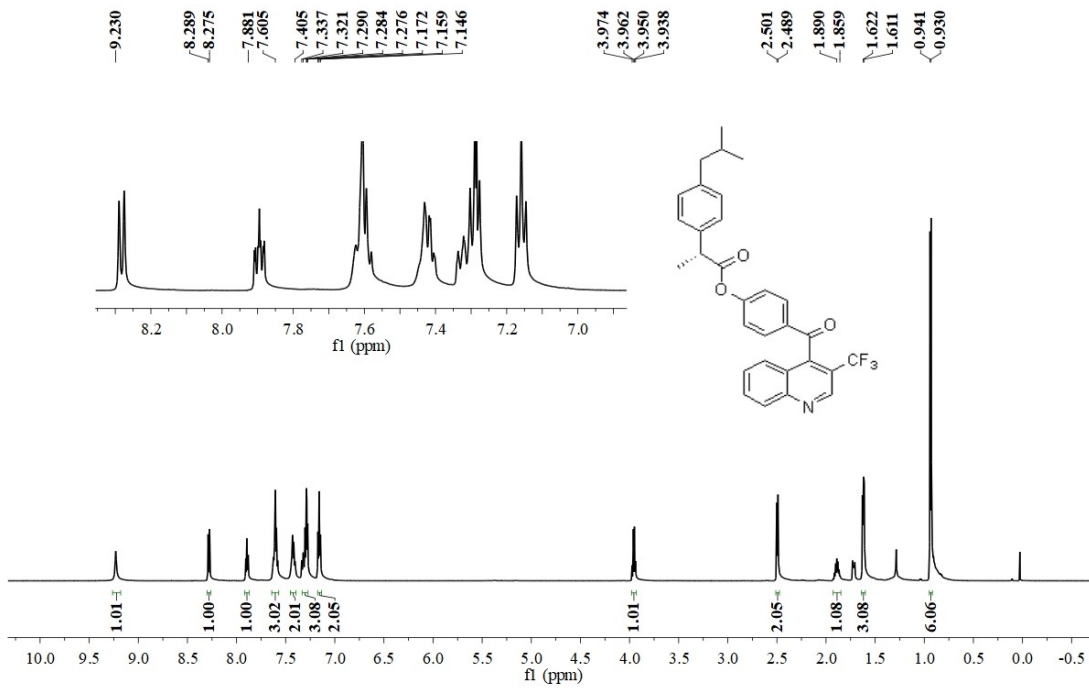

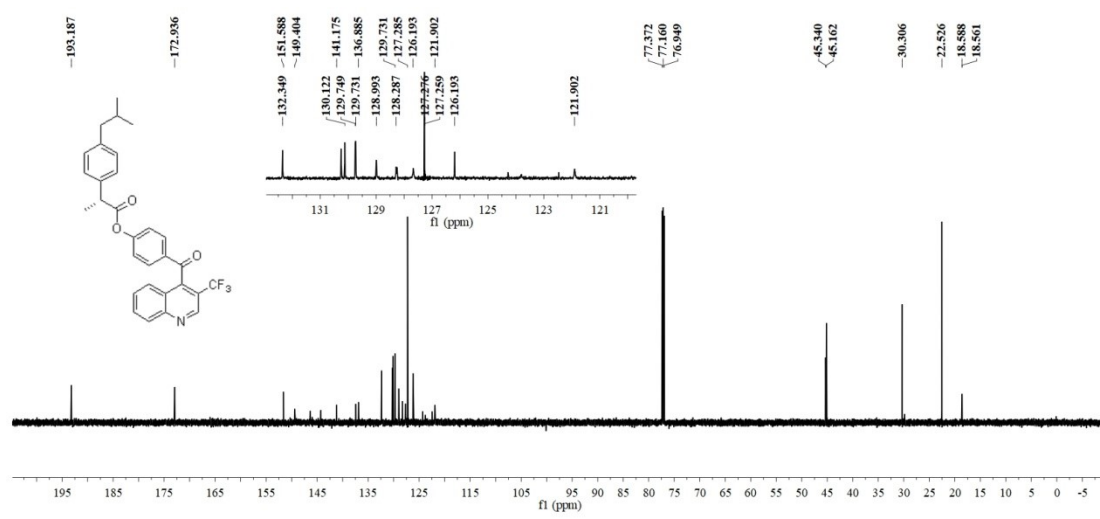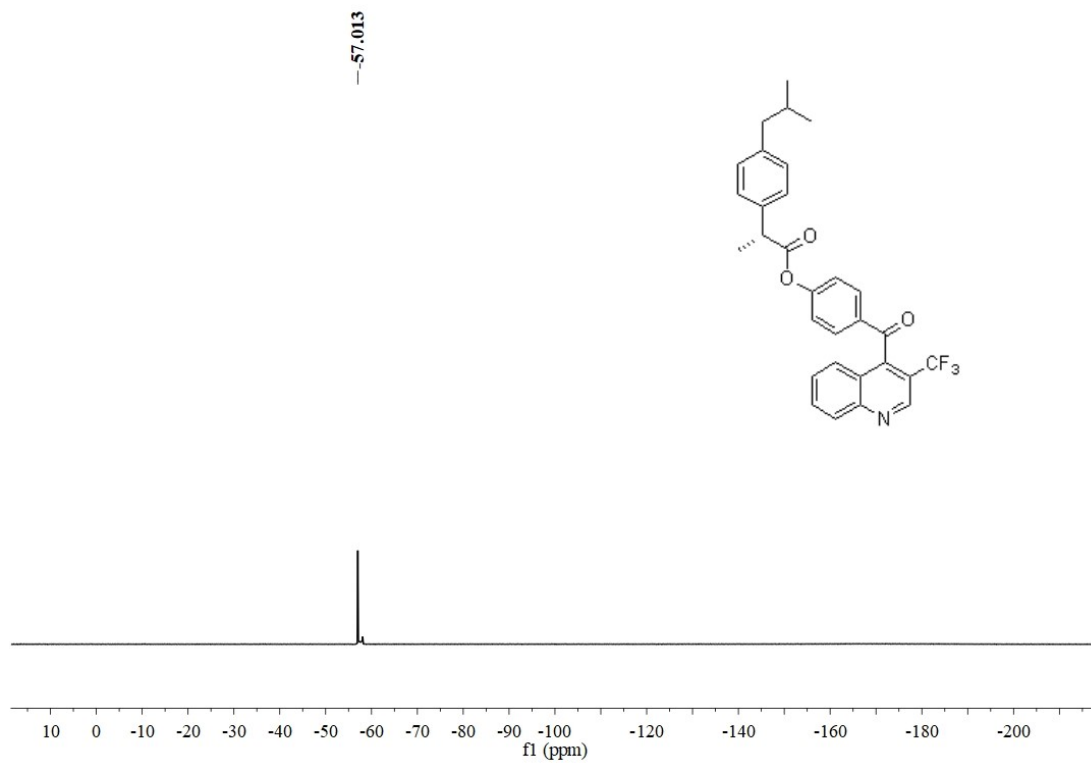

3ao

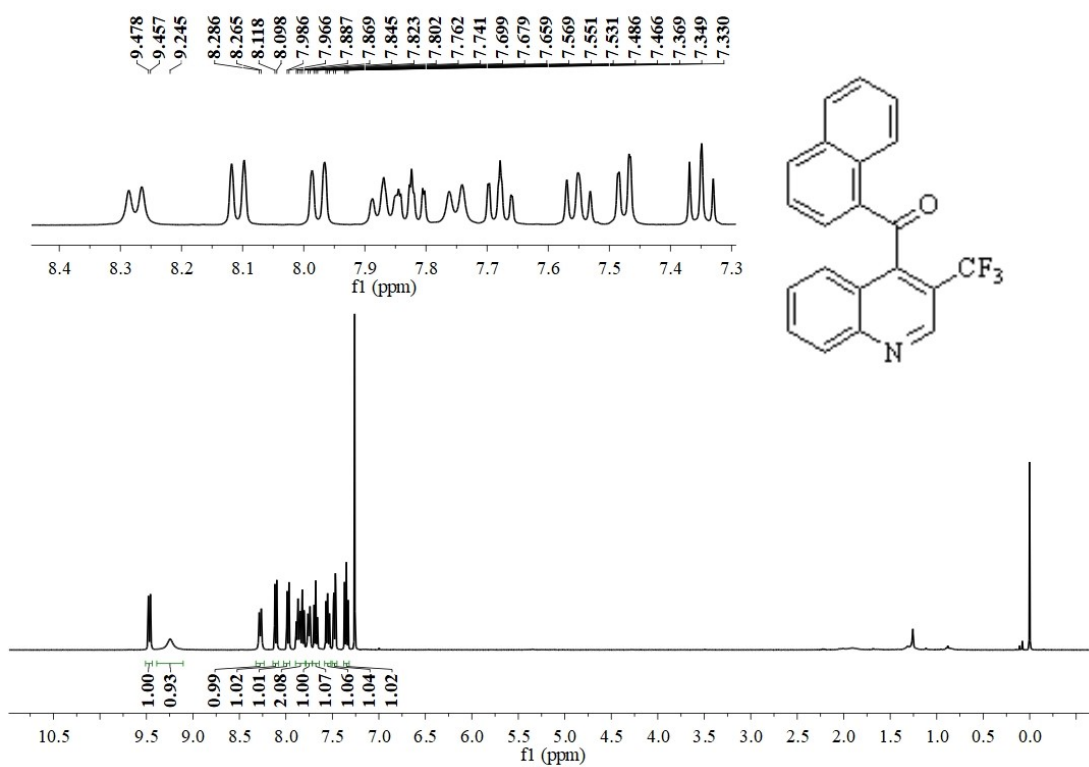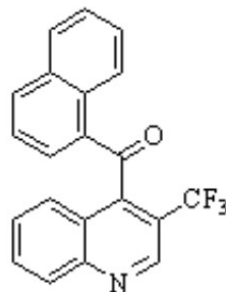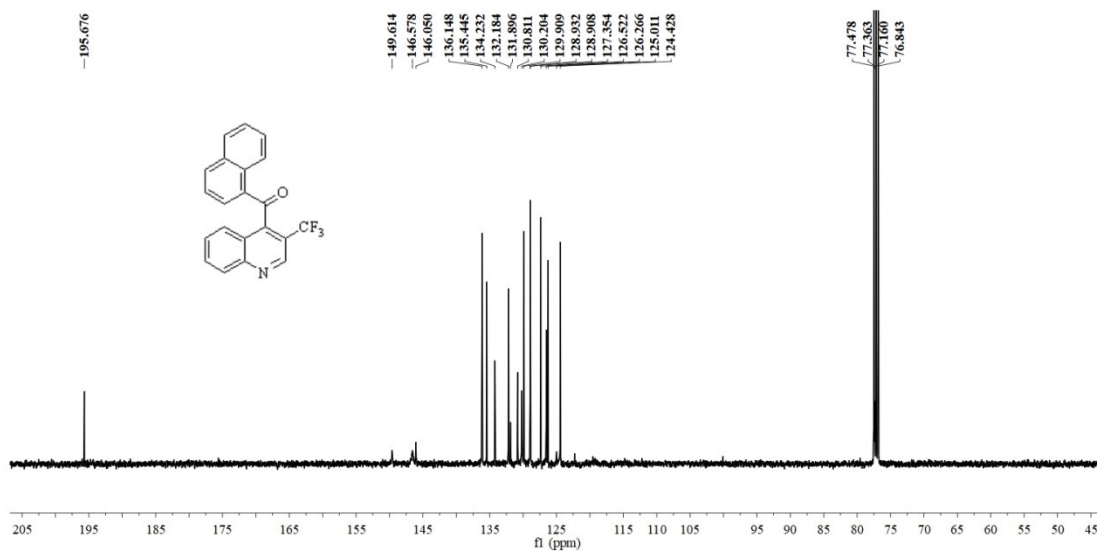



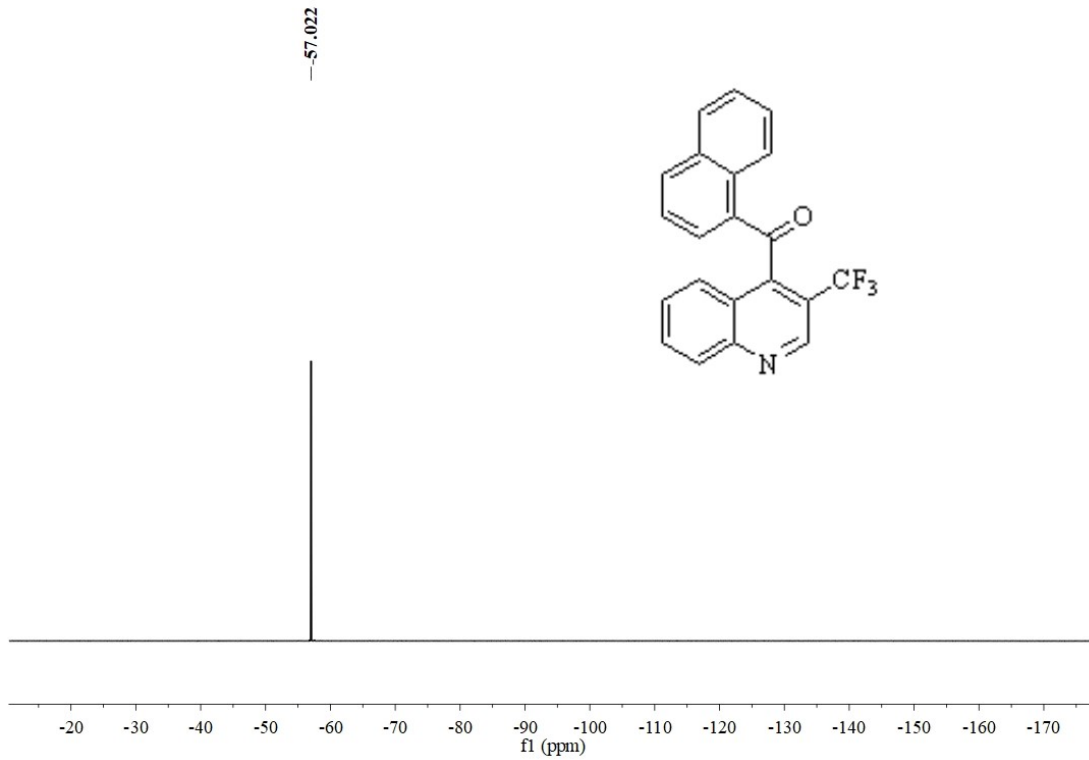

**3ap**

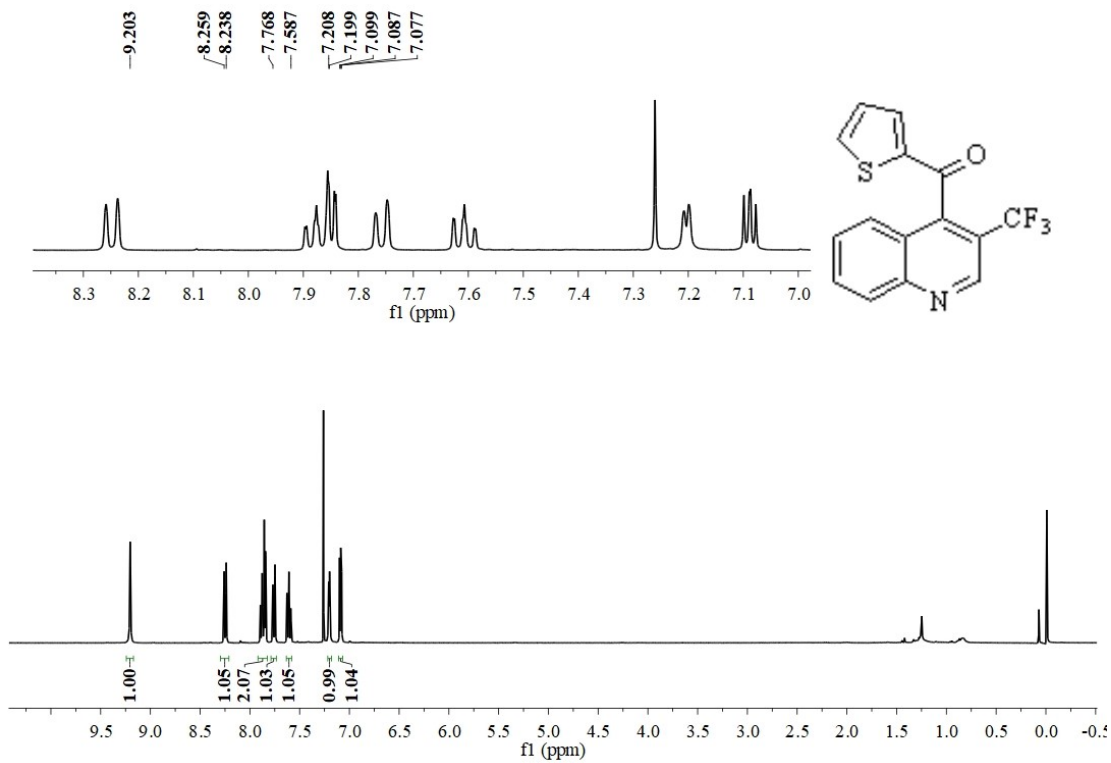

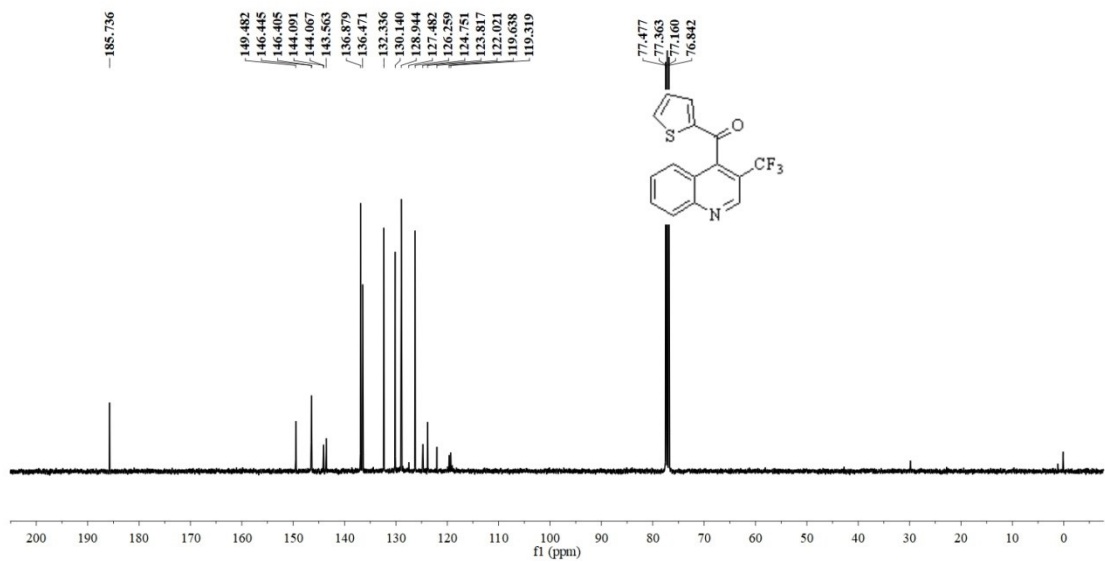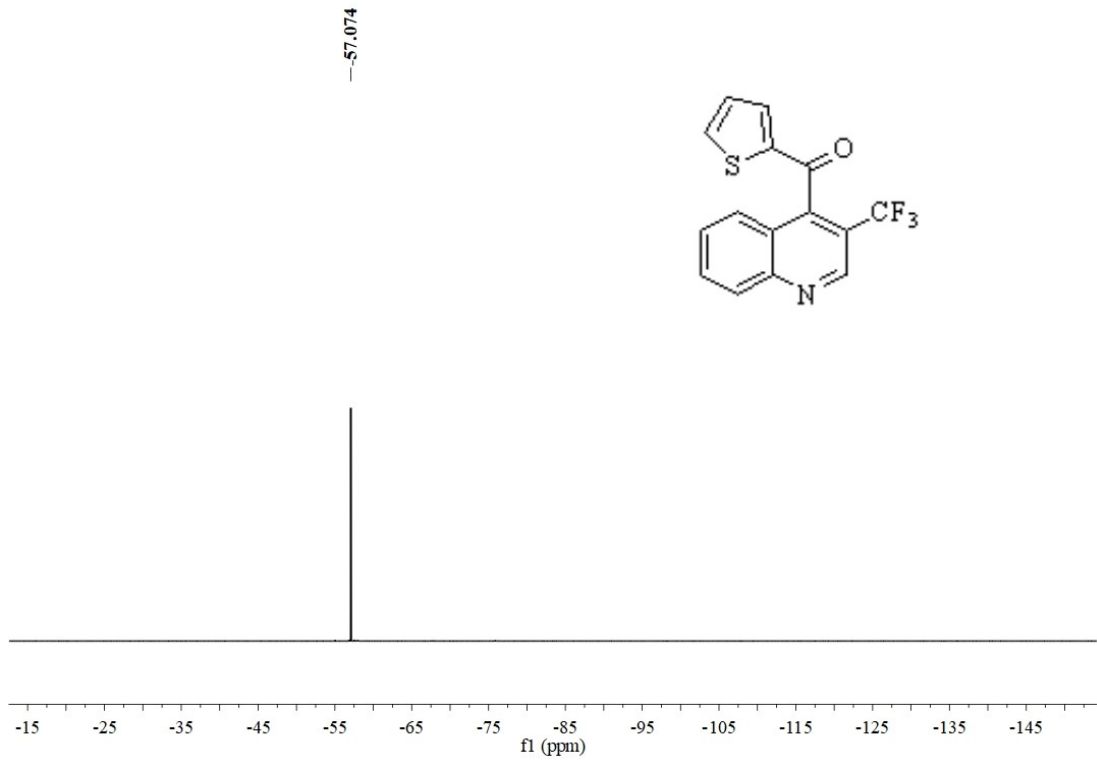

3aq

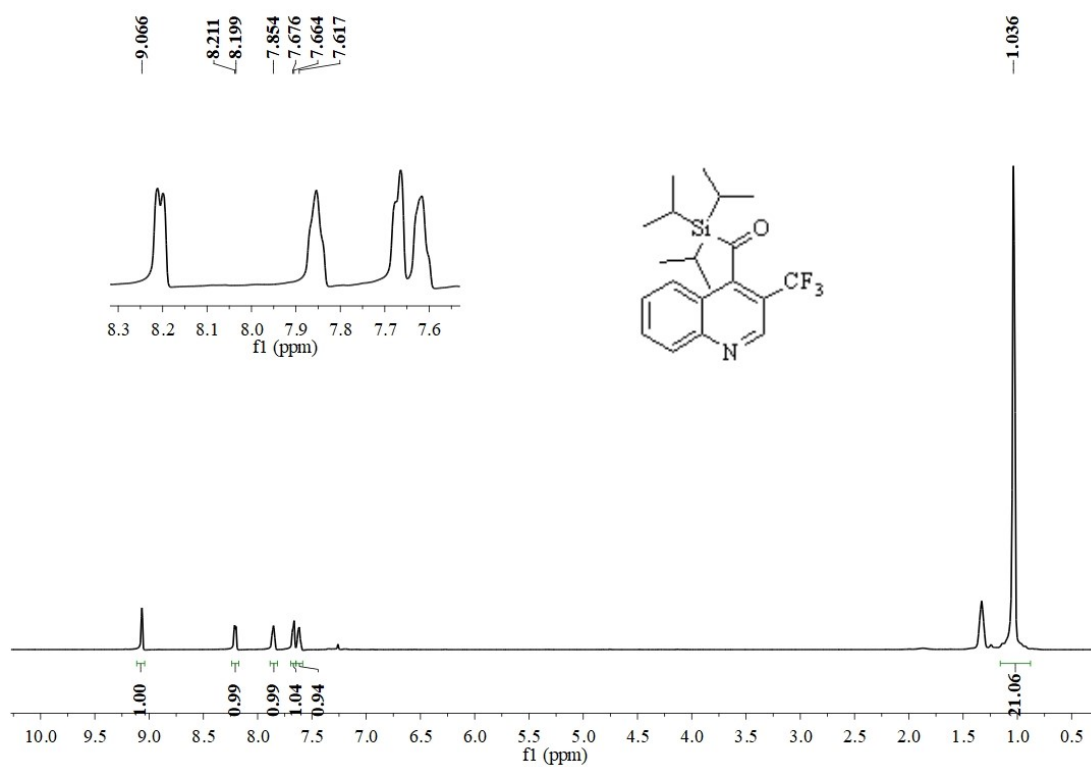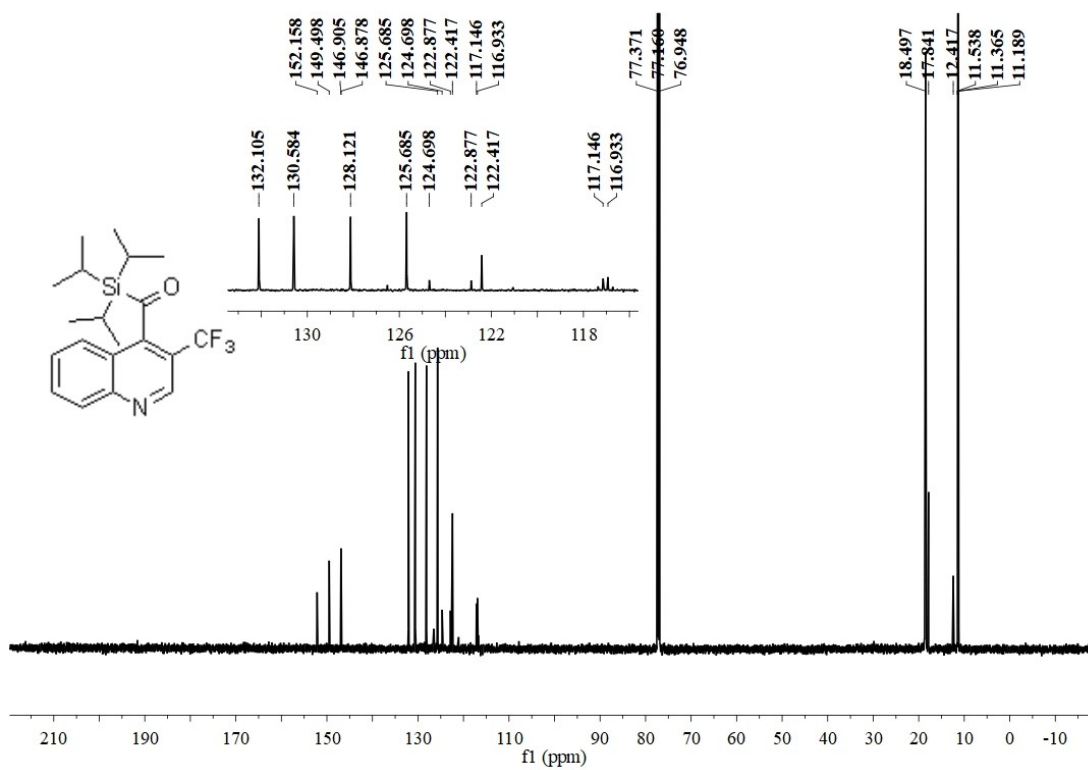

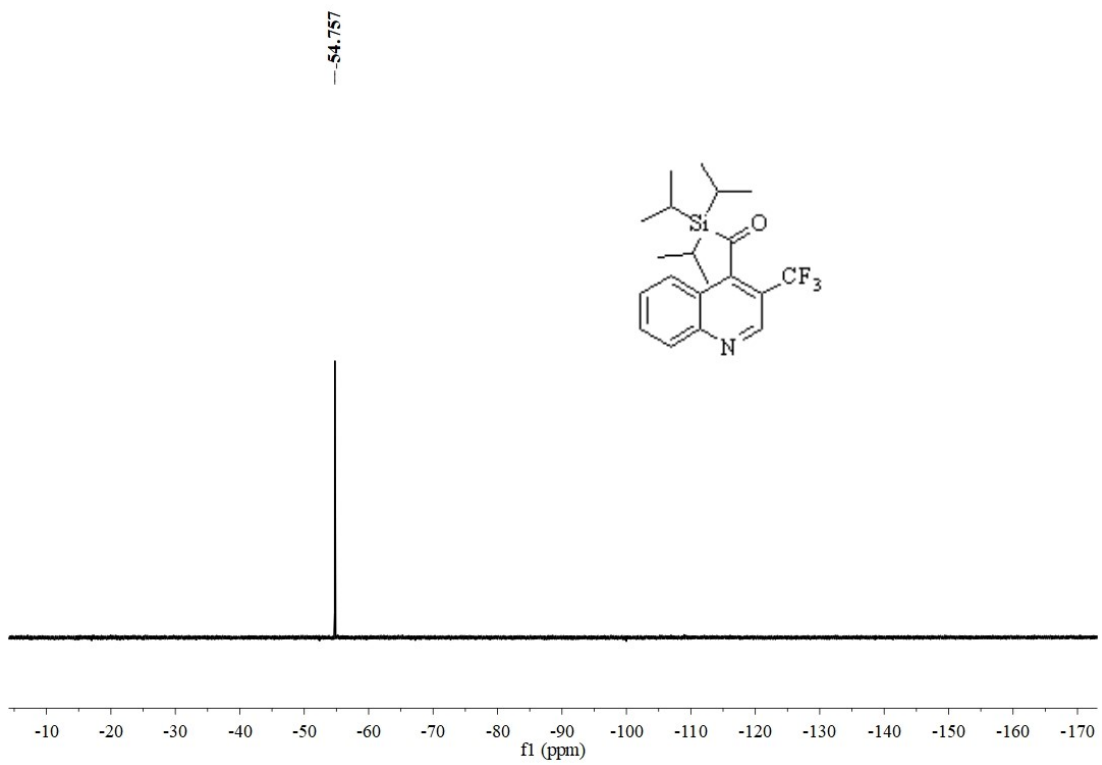

**4ar**

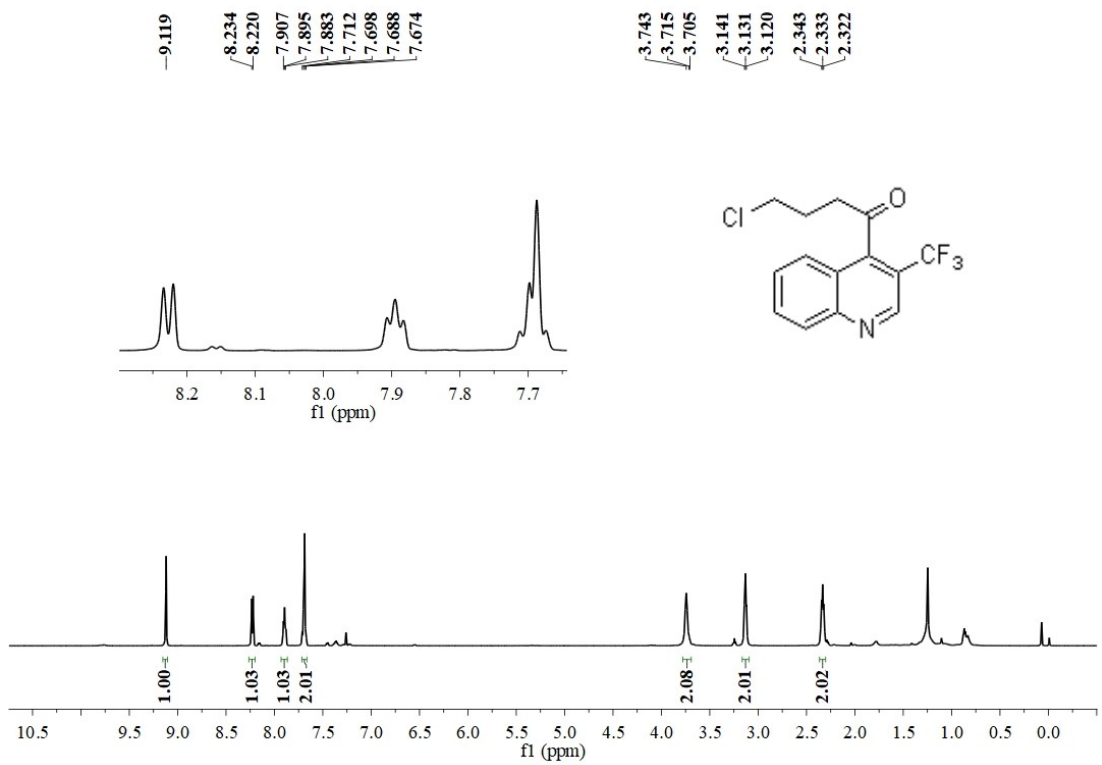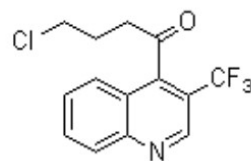

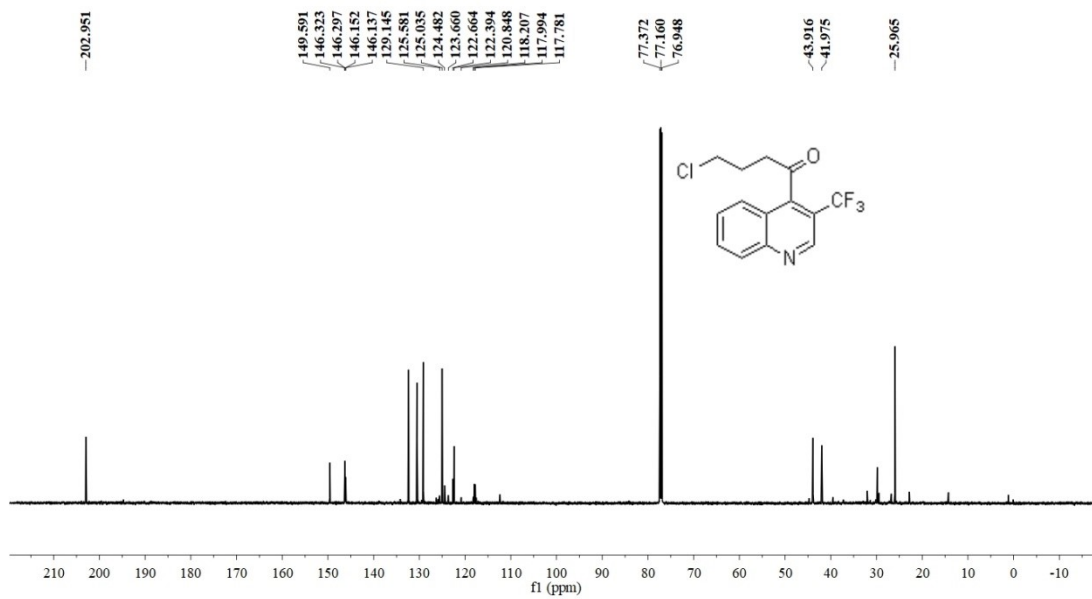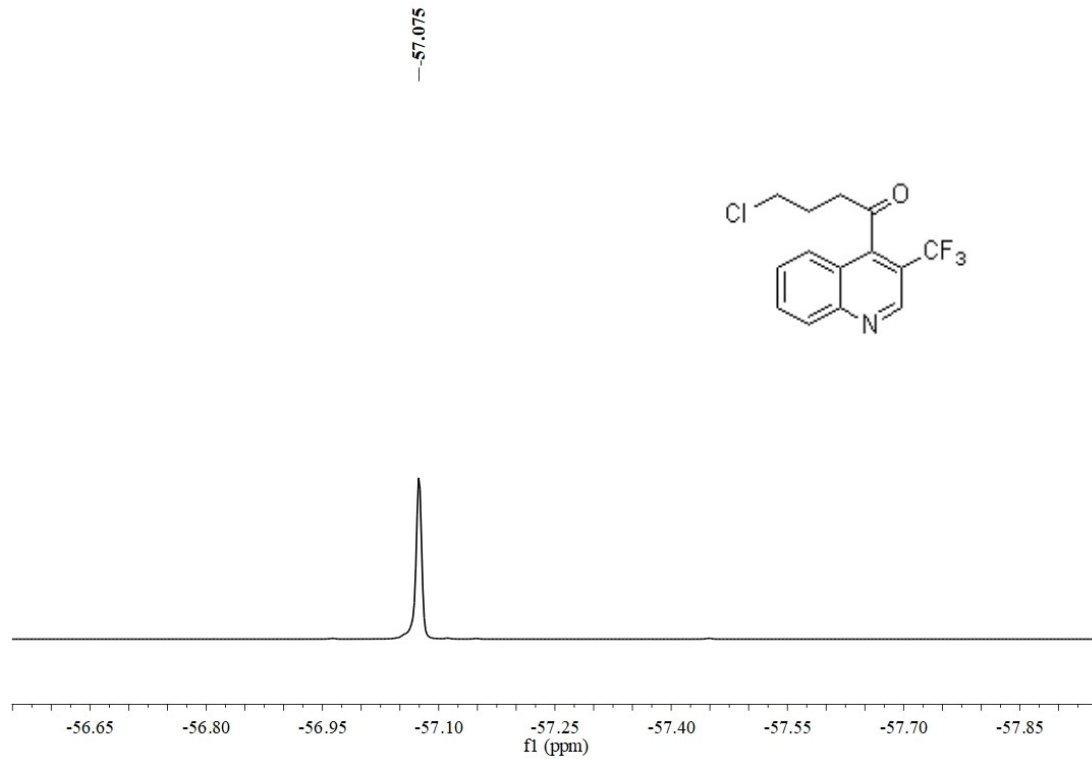

## 12. <sup>1</sup>H NMR, <sup>13</sup>C NMR and <sup>19</sup>F NMR spectra for compound 4

4

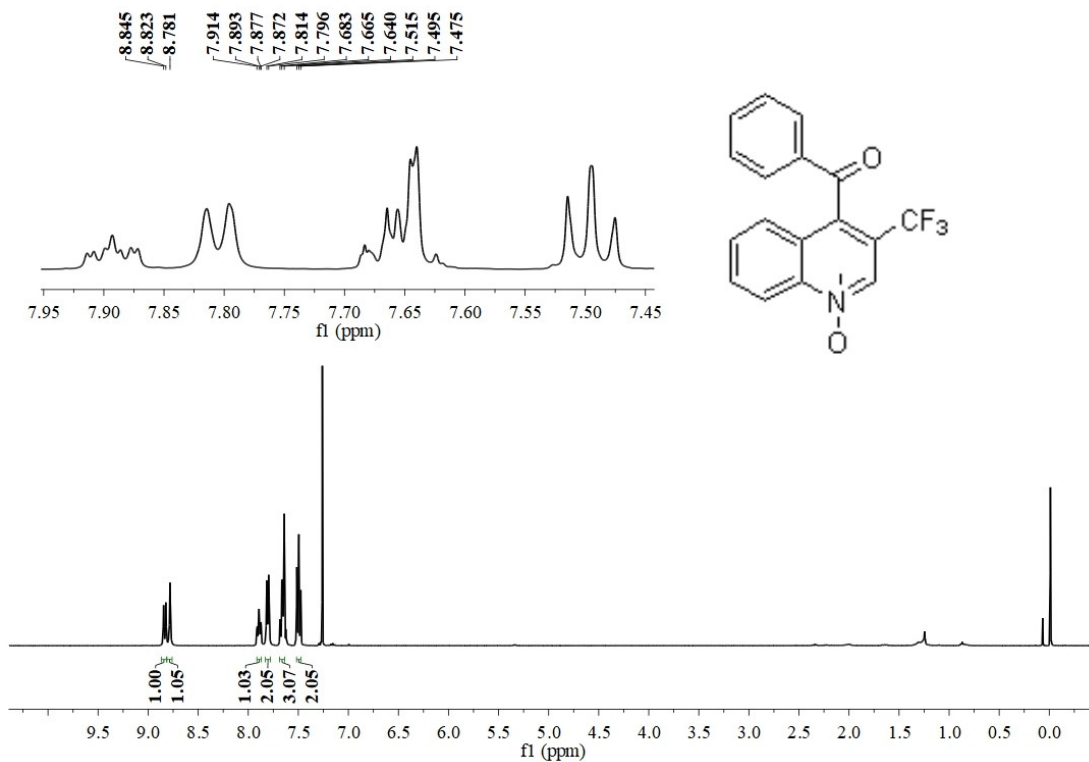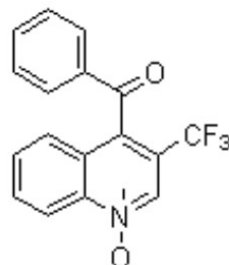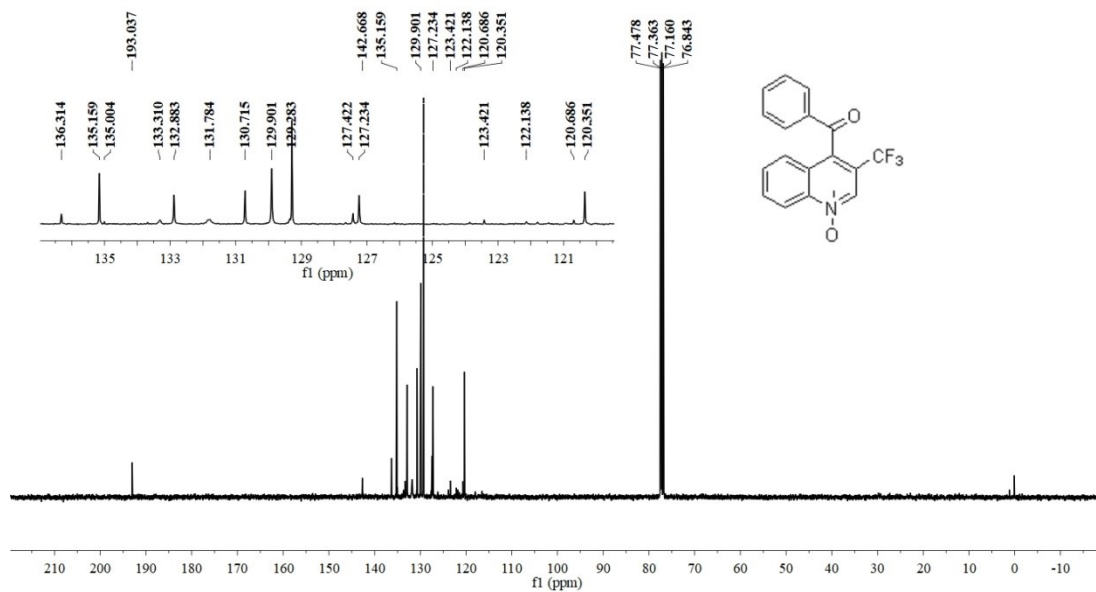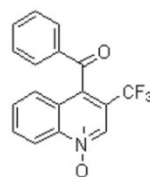

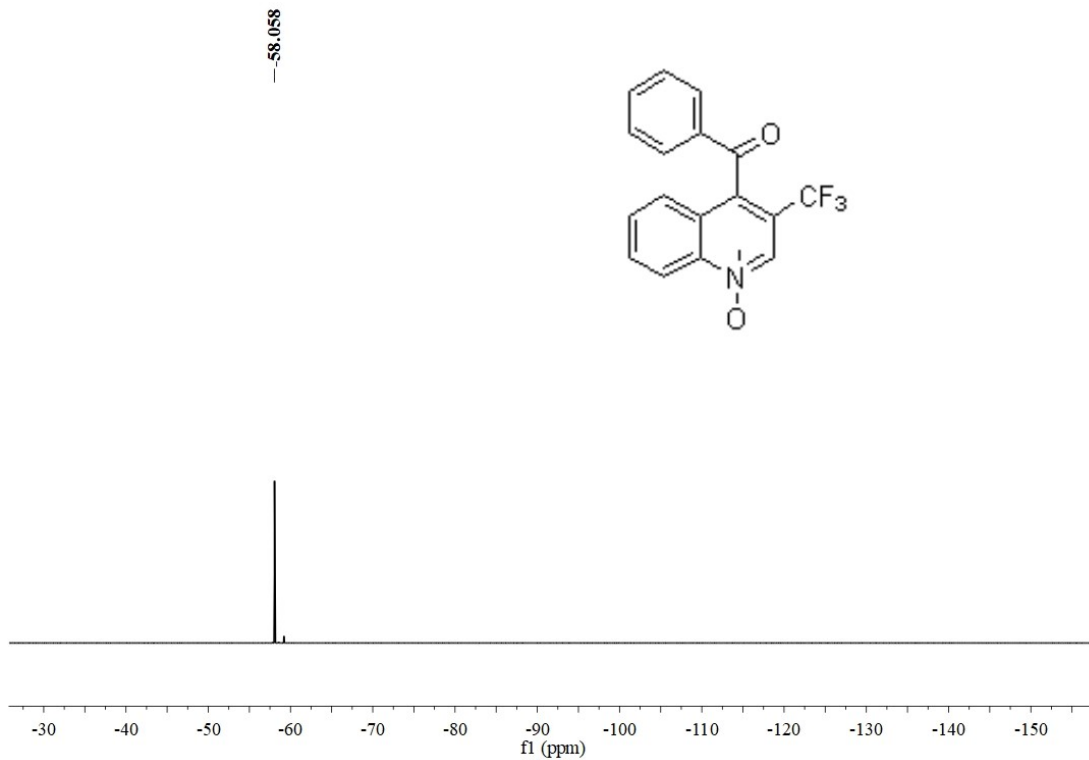

**13. <sup>1</sup>H NMR, <sup>13</sup>C NMR and <sup>19</sup>F NMR spectra for compound 5**

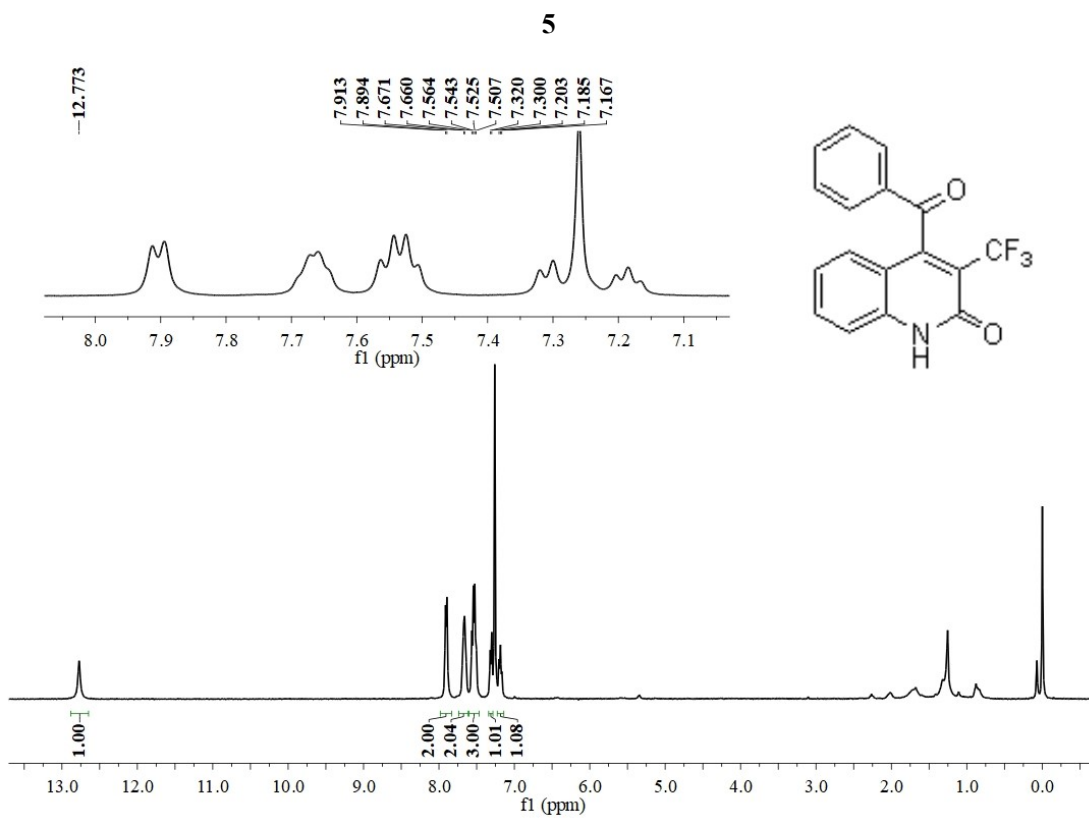

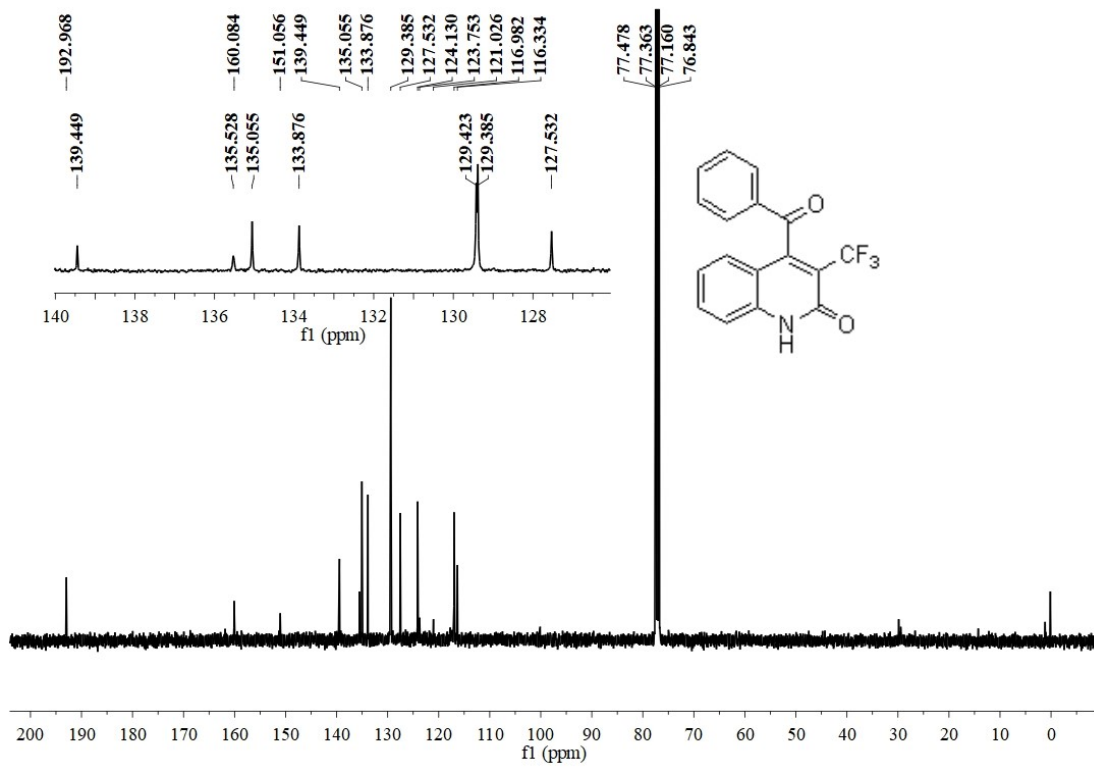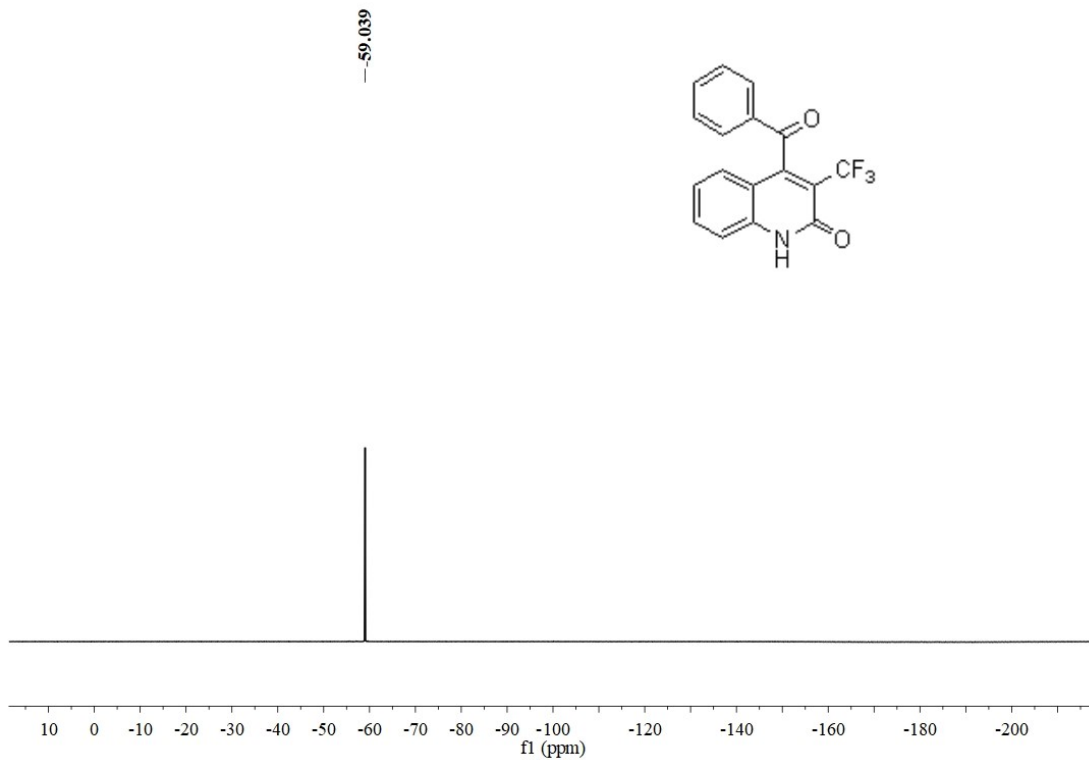

Supplement: d3qo01208e1.pdf [file d3qo01208e1.pdf]
